# Supplementary material
Source: MDPI journal article supplement (https://www.mdpi.com/1996-1073/15/10/3660)
Supplement: s1 [file s1]

### Solar radiation measurements

|                   | Global Horizontal<br>Irradiance (GHI) W/m2 |
|-------------------|--------------------------------------------|
| 1/1/2021 0:15:00  | 0                                          |
| 1/1/2021 0:45:00  | 0                                          |
| 1/1/2021 1:15:00  | 0                                          |
| 1/1/2021 1:45:00  | 0                                          |
| 1/1/2021 2:15:00  | 0                                          |
| 1/1/2021 2:45:00  | 0                                          |
| 1/1/2021 3:15:00  | 0                                          |
| 1/1/2021 3:45:00  | 0                                          |
| 1/1/2021 4:15:00  | 0                                          |
| 1/1/2021 4:45:00  | 0                                          |
| 1/1/2021 5:15:00  | 0                                          |
| 1/1/2021 5:45:00  | 0                                          |
| 1/1/2021 6:15:00  | 0                                          |
| 1/1/2021 6:45:00  | 0                                          |
| 1/1/2021 7:15:00  | 0                                          |
| 1/1/2021 7:45:00  | 288                                        |
| 1/1/2021 8:15:00  | 552                                        |
| 1/1/2021 8:45:00  | 782                                        |
| 1/1/2021 9:15:00  | 827                                        |
| 1/1/2021 9:45:00  | 876                                        |
| 1/1/2021 10:15:00 | 798                                        |
| 1/1/2021 10:45:00 | 500                                        |
| 1/1/2021 11:15:00 | 620                                        |
| 1/1/2021 11:45:00 | 183                                        |
| 1/1/2021 12:15:00 | 541                                        |
| 1/1/2021 12:45:00 | 0                                          |
| 1/1/2021 13:15:00 | 105                                        |
| 1/1/2021 13:45:00 | 121                                        |

|                   |     |
|-------------------|-----|
| 1/1/2021 14:15:00 | 14  |
| 1/1/2021 14:45:00 | 363 |
| 1/1/2021 15:15:00 | 43  |
| 1/1/2021 15:45:00 | 0   |
| 1/1/2021 16:15:00 | 11  |
| 1/1/2021 16:45:00 | 141 |
| 1/1/2021 17:15:00 | 288 |
| 1/1/2021 17:45:00 | 232 |
| 1/1/2021 18:15:00 | 0   |
| 1/1/2021 18:45:00 | 0   |
| 1/1/2021 19:15:00 | 0   |
| 1/1/2021 19:45:00 | 0   |
| 1/1/2021 20:15:00 | 0   |
| 1/1/2021 20:45:00 | 0   |
| 1/1/2021 21:15:00 | 0   |
| 1/1/2021 21:45:00 | 0   |
| 1/1/2021 22:15:00 | 0   |
| 1/1/2021 22:45:00 | 0   |
| 1/1/2021 23:15:00 | 0   |
| 1/1/2021 23:45:00 | 0   |
| 1/2/2021 0:15:00  | 0   |
| 1/2/2021 0:45:00  | 0   |
| 1/2/2021 1:15:00  | 0   |
| 1/2/2021 1:45:00  | 0   |
| 1/2/2021 2:15:00  | 0   |
| 1/2/2021 2:45:00  | 0   |
| 1/2/2021 3:15:00  | 0   |
| 1/2/2021 3:45:00  | 0   |
| 1/2/2021 4:15:00  | 0   |
| 1/2/2021 4:45:00  | 0   |
| 1/2/2021 5:15:00  | 0   |

|                   |     |
|-------------------|-----|
| 1/2/2021 5:45:00  | 0   |
| 1/2/2021 6:15:00  | 0   |
| 1/2/2021 6:45:00  | 0   |
| 1/2/2021 7:15:00  | 0   |
| 1/2/2021 7:45:00  | 308 |
| 1/2/2021 8:15:00  | 625 |
| 1/2/2021 8:45:00  | 797 |
| 1/2/2021 9:15:00  | 867 |
| 1/2/2021 9:45:00  | 910 |
| 1/2/2021 10:15:00 | 938 |
| 1/2/2021 10:45:00 | 960 |
| 1/2/2021 11:15:00 | 984 |
| 1/2/2021 11:45:00 | 988 |
| 1/2/2021 12:15:00 | 987 |
| 1/2/2021 12:45:00 | 983 |
| 1/2/2021 13:15:00 | 969 |
| 1/2/2021 13:45:00 | 978 |
| 1/2/2021 14:15:00 | 948 |
| 1/2/2021 14:45:00 | 814 |
| 1/2/2021 15:15:00 | 266 |
| 1/2/2021 15:45:00 | 748 |
| 1/2/2021 16:15:00 | 842 |
| 1/2/2021 16:45:00 | 761 |
| 1/2/2021 17:15:00 | 607 |
| 1/2/2021 17:45:00 | 315 |
| 1/2/2021 18:15:00 | 0   |
| 1/2/2021 18:45:00 | 0   |
| 1/2/2021 19:15:00 | 0   |
| 1/2/2021 19:45:00 | 0   |
| 1/2/2021 20:15:00 | 0   |
| 1/2/2021 20:45:00 | 0   |

|                   |      |
|-------------------|------|
| 1/2/2021 21:15:00 | 0    |
| 1/2/2021 21:45:00 | 0    |
| 1/2/2021 22:15:00 | 0    |
| 1/2/2021 22:45:00 | 0    |
| 1/2/2021 23:15:00 | 0    |
| 1/2/2021 23:45:00 | 0    |
| 1/3/2021 0:15:00  | 0    |
| 1/3/2021 0:45:00  | 0    |
| 1/3/2021 1:15:00  | 0    |
| 1/3/2021 1:45:00  | 0    |
| 1/3/2021 2:15:00  | 0    |
| 1/3/2021 2:45:00  | 0    |
| 1/3/2021 3:15:00  | 0    |
| 1/3/2021 3:45:00  | 0    |
| 1/3/2021 4:15:00  | 0    |
| 1/3/2021 4:45:00  | 0    |
| 1/3/2021 5:15:00  | 0    |
| 1/3/2021 5:45:00  | 0    |
| 1/3/2021 6:15:00  | 0    |
| 1/3/2021 6:45:00  | 0    |
| 1/3/2021 7:15:00  | 0    |
| 1/3/2021 7:45:00  | 335  |
| 1/3/2021 8:15:00  | 626  |
| 1/3/2021 8:45:00  | 781  |
| 1/3/2021 9:15:00  | 861  |
| 1/3/2021 9:45:00  | 912  |
| 1/3/2021 10:15:00 | 945  |
| 1/3/2021 10:45:00 | 960  |
| 1/3/2021 11:15:00 | 979  |
| 1/3/2021 11:45:00 | 981  |
| 1/3/2021 12:15:00 | 1002 |

|                   |      |
|-------------------|------|
| 1/3/2021 12:45:00 | 1004 |
| 1/3/2021 13:15:00 | 1001 |
| 1/3/2021 13:45:00 | 994  |
| 1/3/2021 14:15:00 | 976  |
| 1/3/2021 14:45:00 | 873  |
| 1/3/2021 15:15:00 | 657  |
| 1/3/2021 15:45:00 | 759  |
| 1/3/2021 16:15:00 | 738  |
| 1/3/2021 16:45:00 | 716  |
| 1/3/2021 17:15:00 | 638  |
| 1/3/2021 17:45:00 | 355  |
| 1/3/2021 18:15:00 | 0    |
| 1/3/2021 18:45:00 | 0    |
| 1/3/2021 19:15:00 | 0    |
| 1/3/2021 19:45:00 | 0    |
| 1/3/2021 20:15:00 | 0    |
| 1/3/2021 20:45:00 | 0    |
| 1/3/2021 21:15:00 | 0    |
| 1/3/2021 21:45:00 | 0    |
| 1/3/2021 22:15:00 | 0    |
| 1/3/2021 22:45:00 | 0    |
| 1/3/2021 23:15:00 | 0    |
| 1/3/2021 23:45:00 | 0    |
| 1/4/2021 0:15:00  | 0    |
| 1/4/2021 0:45:00  | 0    |
| 1/4/2021 1:15:00  | 0    |
| 1/4/2021 1:45:00  | 0    |
| 1/4/2021 2:15:00  | 0    |
| 1/4/2021 2:45:00  | 0    |
| 1/4/2021 3:15:00  | 0    |
| 1/4/2021 3:45:00  | 0    |

|                   |      |
|-------------------|------|
| 1/4/2021 4:15:00  | 0    |
| 1/4/2021 4:45:00  | 0    |
| 1/4/2021 5:15:00  | 0    |
| 1/4/2021 5:45:00  | 0    |
| 1/4/2021 6:15:00  | 0    |
| 1/4/2021 6:45:00  | 0    |
| 1/4/2021 7:15:00  | 0    |
| 1/4/2021 7:45:00  | 321  |
| 1/4/2021 8:15:00  | 616  |
| 1/4/2021 8:45:00  | 780  |
| 1/4/2021 9:15:00  | 866  |
| 1/4/2021 9:45:00  | 910  |
| 1/4/2021 10:15:00 | 944  |
| 1/4/2021 10:45:00 | 968  |
| 1/4/2021 11:15:00 | 979  |
| 1/4/2021 11:45:00 | 995  |
| 1/4/2021 12:15:00 | 1001 |
| 1/4/2021 12:45:00 | 991  |
| 1/4/2021 13:15:00 | 986  |
| 1/4/2021 13:45:00 | 990  |
| 1/4/2021 14:15:00 | 982  |
| 1/4/2021 14:45:00 | 865  |
| 1/4/2021 15:15:00 | 554  |
| 1/4/2021 15:45:00 | 384  |
| 1/4/2021 16:15:00 | 685  |
| 1/4/2021 16:45:00 | 721  |
| 1/4/2021 17:15:00 | 373  |
| 1/4/2021 17:45:00 | 0    |
| 1/4/2021 18:15:00 | 0    |
| 1/4/2021 18:45:00 | 0    |
| 1/4/2021 19:15:00 | 0    |

|                   |     |
|-------------------|-----|
| 1/4/2021 19:45:00 | 0   |
| 1/4/2021 20:15:00 | 0   |
| 1/4/2021 20:45:00 | 0   |
| 1/4/2021 21:15:00 | 0   |
| 1/4/2021 21:45:00 | 0   |
| 1/4/2021 22:15:00 | 0   |
| 1/4/2021 22:45:00 | 0   |
| 1/4/2021 23:15:00 | 0   |
| 1/4/2021 23:45:00 | 0   |
| 1/5/2021 0:15:00  | 0   |
| 1/5/2021 0:45:00  | 0   |
| 1/5/2021 1:15:00  | 0   |
| 1/5/2021 1:45:00  | 0   |
| 1/5/2021 2:15:00  | 0   |
| 1/5/2021 2:45:00  | 0   |
| 1/5/2021 3:15:00  | 0   |
| 1/5/2021 3:45:00  | 0   |
| 1/5/2021 4:15:00  | 0   |
| 1/5/2021 4:45:00  | 0   |
| 1/5/2021 5:15:00  | 0   |
| 1/5/2021 5:45:00  | 0   |
| 1/5/2021 6:15:00  | 0   |
| 1/5/2021 6:45:00  | 0   |
| 1/5/2021 7:15:00  | 0   |
| 1/5/2021 7:45:00  | 335 |
| 1/5/2021 8:15:00  | 626 |
| 1/5/2021 8:45:00  | 780 |
| 1/5/2021 9:15:00  | 860 |
| 1/5/2021 9:45:00  | 912 |
| 1/5/2021 10:15:00 | 944 |
| 1/5/2021 10:45:00 | 952 |

|                   |      |
|-------------------|------|
| 1/5/2021 11:15:00 | 985  |
| 1/5/2021 11:45:00 | 996  |
| 1/5/2021 12:15:00 | 1001 |
| 1/5/2021 12:45:00 | 994  |
| 1/5/2021 13:15:00 | 1002 |
| 1/5/2021 13:45:00 | 986  |
| 1/5/2021 14:15:00 | 974  |
| 1/5/2021 14:45:00 | 956  |
| 1/5/2021 15:15:00 | 901  |
| 1/5/2021 15:45:00 | 833  |
| 1/5/2021 16:15:00 | 781  |
| 1/5/2021 16:45:00 | 737  |
| 1/5/2021 17:15:00 | 625  |
| 1/5/2021 17:45:00 | 345  |
| 1/5/2021 18:15:00 | 0    |
| 1/5/2021 18:45:00 | 0    |
| 1/5/2021 19:15:00 | 0    |
| 1/5/2021 19:45:00 | 0    |
| 1/5/2021 20:15:00 | 0    |
| 1/5/2021 20:45:00 | 0    |
| 1/5/2021 21:15:00 | 0    |
| 1/5/2021 21:45:00 | 0    |
| 1/5/2021 22:15:00 | 0    |
| 1/5/2021 22:45:00 | 0    |
| 1/5/2021 23:15:00 | 0    |
| 1/5/2021 23:45:00 | 0    |
| 1/6/2021 0:15:00  | 0    |
| 1/6/2021 0:45:00  | 0    |
| 1/6/2021 1:15:00  | 0    |
| 1/6/2021 1:45:00  | 0    |
| 1/6/2021 2:15:00  | 0    |



|                   |     |
|-------------------|-----|
| 1/6/2021 2:45:00  | 0   |
| 1/6/2021 3:15:00  | 0   |
| 1/6/2021 3:45:00  | 0   |
| 1/6/2021 4:15:00  | 0   |
| 1/6/2021 4:45:00  | 0   |
| 1/6/2021 5:15:00  | 0   |
| 1/6/2021 5:45:00  | 0   |
| 1/6/2021 6:15:00  | 0   |
| 1/6/2021 6:45:00  | 0   |
| 1/6/2021 7:15:00  | 0   |
| 1/6/2021 7:45:00  | 297 |
| 1/6/2021 8:15:00  | 543 |
| 1/6/2021 8:45:00  | 780 |
| 1/6/2021 9:15:00  | 865 |
| 1/6/2021 9:45:00  | 902 |
| 1/6/2021 10:15:00 | 945 |
| 1/6/2021 10:45:00 | 969 |
| 1/6/2021 11:15:00 | 985 |
| 1/6/2021 11:45:00 | 996 |
| 1/6/2021 12:15:00 | 998 |
| 1/6/2021 12:45:00 | 991 |
| 1/6/2021 13:15:00 | 988 |
| 1/6/2021 13:45:00 | 995 |
| 1/6/2021 14:15:00 | 970 |
| 1/6/2021 14:45:00 | 965 |
| 1/6/2021 15:15:00 | 941 |
| 1/6/2021 15:45:00 | 884 |
| 1/6/2021 16:15:00 | 842 |
| 1/6/2021 16:45:00 | 767 |
| 1/6/2021 17:15:00 | 644 |
| 1/6/2021 17:45:00 | 371 |

|                   |     |
|-------------------|-----|
| 1/6/2021 18:15:00 | 0   |
| 1/6/2021 18:45:00 | 0   |
| 1/6/2021 19:15:00 | 0   |
| 1/6/2021 19:45:00 | 0   |
| 1/6/2021 20:15:00 | 0   |
| 1/6/2021 20:45:00 | 0   |
| 1/6/2021 21:15:00 | 0   |
| 1/6/2021 21:45:00 | 0   |
| 1/6/2021 22:15:00 | 0   |
| 1/6/2021 22:45:00 | 0   |
| 1/6/2021 23:15:00 | 0   |
| 1/6/2021 23:45:00 | 0   |
| 1/7/2021 0:15:00  | 0   |
| 1/7/2021 0:45:00  | 0   |
| 1/7/2021 1:15:00  | 0   |
| 1/7/2021 1:45:00  | 0   |
| 1/7/2021 2:15:00  | 0   |
| 1/7/2021 2:45:00  | 0   |
| 1/7/2021 3:15:00  | 0   |
| 1/7/2021 3:45:00  | 0   |
| 1/7/2021 4:15:00  | 0   |
| 1/7/2021 4:45:00  | 0   |
| 1/7/2021 5:15:00  | 0   |
| 1/7/2021 5:45:00  | 0   |
| 1/7/2021 6:15:00  | 0   |
| 1/7/2021 6:45:00  | 0   |
| 1/7/2021 7:15:00  | 0   |
| 1/7/2021 7:45:00  | 328 |
| 1/7/2021 8:15:00  | 624 |
| 1/7/2021 8:45:00  | 796 |
| 1/7/2021 9:15:00  | 866 |

|                   |     |
|-------------------|-----|
| 1/7/2021 9:45:00  | 912 |
| 1/7/2021 10:15:00 | 945 |
| 1/7/2021 10:45:00 | 969 |
| 1/7/2021 11:15:00 | 985 |
| 1/7/2021 11:45:00 | 997 |
| 1/7/2021 12:15:00 | 987 |
| 1/7/2021 12:45:00 | 977 |
| 1/7/2021 13:15:00 | 980 |
| 1/7/2021 13:45:00 | 981 |
| 1/7/2021 14:15:00 | 983 |
| 1/7/2021 14:45:00 | 955 |
| 1/7/2021 15:15:00 | 938 |
| 1/7/2021 15:45:00 | 907 |
| 1/7/2021 16:15:00 | 850 |
| 1/7/2021 16:45:00 | 765 |
| 1/7/2021 17:15:00 | 596 |
| 1/7/2021 17:45:00 | 300 |
| 1/7/2021 18:15:00 | 0   |
| 1/8/2021 7:45:00  | 291 |
| 1/8/2021 8:15:00  | 562 |
| 1/8/2021 8:45:00  | 733 |
| 1/8/2021 9:15:00  | 866 |
| 1/8/2021 9:45:00  | 909 |
| 1/8/2021 10:15:00 | 944 |
| 1/8/2021 10:45:00 | 967 |
| 1/8/2021 11:15:00 | 985 |
| 1/8/2021 11:45:00 | 997 |
| 1/8/2021 12:15:00 | 980 |
| 1/8/2021 12:45:00 | 958 |
| 1/8/2021 13:15:00 | 929 |
| 1/8/2021 13:45:00 | 914 |

|                   |      |
|-------------------|------|
| 1/8/2021 14:15:00 | 770  |
| 1/8/2021 14:45:00 | 562  |
| 1/8/2021 15:15:00 | 358  |
| 1/8/2021 15:45:00 | 166  |
| 1/8/2021 16:15:00 | 639  |
| 1/8/2021 16:45:00 | 671  |
| 1/8/2021 17:15:00 | 603  |
| 1/8/2021 17:45:00 | 298  |
| 1/8/2021 18:15:00 | 0    |
| 1/8/2021 21:45:00 | 0    |
| 1/8/2021 22:15:00 | 0    |
| 1/8/2021 23:15:00 | 0    |
| 1/9/2021 7:15:00  | 0    |
| 1/9/2021 7:45:00  | 315  |
| 1/9/2021 8:15:00  | 586  |
| 1/9/2021 8:45:00  | 735  |
| 1/9/2021 9:15:00  | 724  |
| 1/9/2021 9:45:00  | 867  |
| 1/9/2021 10:15:00 | 938  |
| 1/9/2021 10:45:00 | 953  |
| 1/9/2021 11:15:00 | 981  |
| 1/9/2021 11:45:00 | 985  |
| 1/9/2021 12:15:00 | 1004 |
| 1/9/2021 12:45:00 | 1006 |
| 1/9/2021 13:15:00 | 997  |
| 1/9/2021 13:45:00 | 991  |
| 1/9/2021 14:15:00 | 985  |
| 1/9/2021 14:45:00 | 952  |
| 1/9/2021 15:15:00 | 854  |
| 1/9/2021 15:45:00 | 752  |
| 1/9/2021 16:15:00 | 779  |

|                    |      |
|--------------------|------|
| 1/9/2021 16:45:00  | 590  |
| 1/9/2021 17:15:00  | 349  |
| 1/9/2021 17:45:00  | 281  |
| 1/10/2021 7:15:00  | 0    |
| 1/10/2021 7:45:00  | 281  |
| 1/10/2021 8:15:00  | 421  |
| 1/10/2021 8:45:00  | 511  |
| 1/10/2021 9:15:00  | 544  |
| 1/10/2021 9:45:00  | 790  |
| 1/10/2021 10:15:00 | 885  |
| 1/10/2021 10:45:00 | 969  |
| 1/10/2021 11:15:00 | 986  |
| 1/10/2021 11:45:00 | 952  |
| 1/10/2021 12:15:00 | 827  |
| 1/10/2021 12:45:00 | 957  |
| 1/10/2021 13:15:00 | 1004 |
| 1/10/2021 13:45:00 | 997  |
| 1/10/2021 14:15:00 | 985  |
| 1/10/2021 14:45:00 | 968  |
| 1/10/2021 15:15:00 | 944  |
| 1/10/2021 15:45:00 | 910  |
| 1/10/2021 16:15:00 | 860  |
| 1/10/2021 16:45:00 | 776  |
| 1/10/2021 17:15:00 | 577  |
| 1/10/2021 17:45:00 | 359  |
| 1/11/2021 7:15:00  | 0    |
| 1/11/2021 7:45:00  | 260  |
| 1/11/2021 8:15:00  | 524  |
| 1/11/2021 8:45:00  | 795  |
| 1/11/2021 9:15:00  | 866  |
| 1/11/2021 9:45:00  | 912  |

|                    |      |
|--------------------|------|
| 1/11/2021 10:15:00 | 946  |
| 1/11/2021 10:45:00 | 969  |
| 1/11/2021 11:15:00 | 986  |
| 1/11/2021 11:45:00 | 998  |
| 1/11/2021 12:15:00 | 998  |
| 1/11/2021 12:45:00 | 1007 |
| 1/11/2021 13:15:00 | 1004 |
| 1/11/2021 13:45:00 | 998  |
| 1/11/2021 14:15:00 | 986  |
| 1/11/2021 14:45:00 | 949  |
| 1/11/2021 15:15:00 | 903  |
| 1/11/2021 15:45:00 | 880  |
| 1/11/2021 16:15:00 | 835  |
| 1/11/2021 16:45:00 | 738  |
| 1/11/2021 17:15:00 | 523  |
| 1/11/2021 17:45:00 | 342  |
| 1/12/2021 7:15:00  | 0    |
| 1/12/2021 7:45:00  | 0    |
| 1/12/2021 8:15:00  | 0    |
| 1/12/2021 8:45:00  | 0    |
| 1/12/2021 9:15:00  | 0    |
| 1/12/2021 9:45:00  | 2    |
| 1/12/2021 10:15:00 | 46   |
| 1/12/2021 10:45:00 | 110  |
| 1/12/2021 11:15:00 | 698  |
| 1/12/2021 11:45:00 | 953  |
| 1/12/2021 12:15:00 | 1005 |
| 1/12/2021 12:45:00 | 992  |
| 1/12/2021 13:15:00 | 1005 |
| 1/12/2021 13:45:00 | 996  |
| 1/12/2021 14:15:00 | 987  |

|                    |     |
|--------------------|-----|
| 1/12/2021 14:45:00 | 963 |
| 1/12/2021 15:15:00 | 946 |
| 1/12/2021 15:45:00 | 903 |
| 1/12/2021 16:15:00 | 851 |
| 1/12/2021 16:45:00 | 776 |
| 1/12/2021 17:15:00 | 648 |
| 1/12/2021 17:45:00 | 380 |
| 1/13/2021 7:15:00  | 0   |
| 1/13/2021 7:45:00  | 15  |
| 1/13/2021 8:15:00  | 0   |
| 1/13/2021 8:45:00  | 0   |
| 1/13/2021 9:15:00  | 343 |
| 1/13/2021 9:45:00  | 0   |
| 1/13/2021 10:15:00 | 127 |
| 1/13/2021 10:45:00 | 54  |
| 1/13/2021 11:15:00 | 800 |
| 1/13/2021 11:45:00 | 998 |
| 1/13/2021 12:15:00 | 948 |
| 1/13/2021 12:45:00 | 767 |
| 1/13/2021 13:15:00 | 35  |
| 1/13/2021 13:45:00 | 26  |
| 1/13/2021 14:15:00 | 0   |
| 1/13/2021 14:45:00 | 0   |
| 1/13/2021 15:15:00 | 0   |
| 1/13/2021 15:45:00 | 0   |
| 1/13/2021 16:15:00 | 0   |
| 1/13/2021 16:45:00 | 0   |
| 1/13/2021 17:15:00 | 0   |
| 1/13/2021 17:45:00 | 91  |
| 1/13/2021 18:15:00 | 0   |
| 1/14/2021 7:15:00  | 0   |

|                    |      |
|--------------------|------|
| 1/14/2021 7:45:00  | 361  |
| 1/14/2021 8:15:00  | 658  |
| 1/14/2021 8:45:00  | 764  |
| 1/14/2021 9:15:00  | 837  |
| 1/14/2021 9:45:00  | 913  |
| 1/14/2021 10:15:00 | 946  |
| 1/14/2021 10:45:00 | 970  |
| 1/14/2021 11:15:00 | 987  |
| 1/14/2021 11:45:00 | 999  |
| 1/14/2021 12:15:00 | 1006 |
| 1/14/2021 12:45:00 | 1006 |
| 1/14/2021 13:15:00 | 1004 |
| 1/14/2021 13:45:00 | 988  |
| 1/14/2021 14:15:00 | 947  |
| 1/14/2021 14:45:00 | 911  |
| 1/14/2021 15:15:00 | 875  |
| 1/14/2021 15:45:00 | 812  |
| 1/14/2021 16:15:00 | 829  |
| 1/14/2021 16:45:00 | 752  |
| 1/14/2021 17:15:00 | 610  |
| 1/14/2021 17:45:00 | 360  |
| 1/14/2021 18:15:00 | 0    |
| 1/15/2021 7:15:00  | 0    |
| 1/15/2021 7:45:00  | 344  |
| 1/15/2021 8:15:00  | 658  |
| 1/15/2021 8:45:00  | 772  |
| 1/15/2021 9:15:00  | 838  |
| 1/15/2021 9:45:00  | 901  |
| 1/15/2021 10:15:00 | 921  |
| 1/15/2021 10:45:00 | 962  |
| 1/15/2021 11:15:00 | 983  |



|                    |      |
|--------------------|------|
| 1/15/2021 11:45:00 | 988  |
| 1/15/2021 12:15:00 | 928  |
| 1/15/2021 12:45:00 | 797  |
| 1/15/2021 13:15:00 | 347  |
| 1/15/2021 13:45:00 | 185  |
| 1/15/2021 14:15:00 | 0    |
| 1/15/2021 14:45:00 | 624  |
| 1/15/2021 15:15:00 | 50   |
| 1/15/2021 15:45:00 | 82   |
| 1/15/2021 16:15:00 | 333  |
| 1/15/2021 16:45:00 | 158  |
| 1/15/2021 17:15:00 | 0    |
| 1/15/2021 17:45:00 | 163  |
| 1/15/2021 18:15:00 | 0    |
| 1/16/2021 7:15:00  | 0    |
| 1/16/2021 7:45:00  | 235  |
| 1/16/2021 8:15:00  | 621  |
| 1/16/2021 8:45:00  | 789  |
| 1/16/2021 9:15:00  | 864  |
| 1/16/2021 9:45:00  | 910  |
| 1/16/2021 10:15:00 | 947  |
| 1/16/2021 10:45:00 | 971  |
| 1/16/2021 11:15:00 | 988  |
| 1/16/2021 11:45:00 | 996  |
| 1/16/2021 12:15:00 | 998  |
| 1/16/2021 12:45:00 | 1004 |
| 1/16/2021 13:15:00 | 1007 |
| 1/16/2021 13:45:00 | 1001 |
| 1/16/2021 14:15:00 | 989  |
| 1/16/2021 14:45:00 | 973  |
| 1/16/2021 15:15:00 | 950  |

|                    |      |
|--------------------|------|
| 1/16/2021 15:45:00 | 917  |
| 1/16/2021 16:15:00 | 872  |
| 1/16/2021 16:45:00 | 800  |
| 1/16/2021 17:15:00 | 681  |
| 1/16/2021 17:45:00 | 410  |
| 1/16/2021 18:15:00 | 0    |
| 1/17/2021 7:15:00  | 0    |
| 1/17/2021 7:45:00  | 272  |
| 1/17/2021 8:15:00  | 619  |
| 1/17/2021 8:45:00  | 768  |
| 1/17/2021 9:15:00  | 839  |
| 1/17/2021 9:45:00  | 904  |
| 1/17/2021 10:15:00 | 947  |
| 1/17/2021 10:45:00 | 967  |
| 1/17/2021 11:15:00 | 988  |
| 1/17/2021 11:45:00 | 997  |
| 1/17/2021 12:15:00 | 1007 |
| 1/17/2021 12:45:00 | 1009 |
| 1/17/2021 13:15:00 | 1007 |
| 1/17/2021 13:45:00 | 1001 |
| 1/17/2021 14:15:00 | 990  |
| 1/17/2021 14:45:00 | 974  |
| 1/17/2021 15:15:00 | 951  |
| 1/17/2021 15:45:00 | 918  |
| 1/17/2021 16:15:00 | 874  |
| 1/17/2021 16:45:00 | 808  |
| 1/17/2021 17:15:00 | 680  |
| 1/17/2021 17:45:00 | 422  |
| 1/17/2021 18:15:00 | 0    |
| 1/18/2021 7:15:00  | 0    |
| 1/18/2021 7:45:00  | 272  |

|                    |      |
|--------------------|------|
| 1/18/2021 8:15:00  | 621  |
| 1/18/2021 8:45:00  | 795  |
| 1/18/2021 9:15:00  | 867  |
| 1/18/2021 9:45:00  | 904  |
| 1/18/2021 10:15:00 | 947  |
| 1/18/2021 10:45:00 | 968  |
| 1/18/2021 11:15:00 | 989  |
| 1/18/2021 11:45:00 | 998  |
| 1/18/2021 12:15:00 | 1007 |
| 1/18/2021 12:45:00 | 1007 |
| 1/18/2021 13:15:00 | 954  |
| 1/18/2021 13:45:00 | 910  |
| 1/18/2021 14:15:00 | 942  |
| 1/18/2021 14:45:00 | 927  |
| 1/18/2021 15:15:00 | 786  |
| 1/18/2021 15:45:00 | 676  |
| 1/18/2021 16:15:00 | 768  |
| 1/18/2021 16:45:00 | 706  |
| 1/18/2021 17:15:00 | 428  |
| 1/18/2021 17:45:00 | 190  |
| 1/18/2021 18:15:00 | 0    |
| 1/19/2021 7:15:00  | 0    |
| 1/19/2021 7:45:00  | 272  |
| 1/19/2021 8:15:00  | 620  |
| 1/19/2021 8:45:00  | 792  |
| 1/19/2021 9:15:00  | 867  |
| 1/19/2021 9:45:00  | 905  |
| 1/19/2021 10:15:00 | 945  |
| 1/19/2021 10:45:00 | 972  |
| 1/19/2021 11:15:00 | 989  |
| 1/19/2021 11:45:00 | 999  |

|                    |      |
|--------------------|------|
| 1/19/2021 12:15:00 | 1008 |
| 1/19/2021 12:45:00 | 1010 |
| 1/19/2021 13:15:00 | 1008 |
| 1/19/2021 13:45:00 | 1002 |
| 1/19/2021 14:15:00 | 991  |
| 1/19/2021 14:45:00 | 975  |
| 1/19/2021 15:15:00 | 953  |
| 1/19/2021 15:45:00 | 921  |
| 1/19/2021 16:15:00 | 877  |
| 1/19/2021 16:45:00 | 812  |
| 1/19/2021 17:15:00 | 694  |
| 1/19/2021 17:45:00 | 437  |
| 1/19/2021 18:15:00 | 0    |
| 1/19/2021 18:45:00 | 0    |
| 1/19/2021 19:15:00 | 0    |
| 1/19/2021 19:45:00 | 0    |
| 1/19/2021 20:15:00 | 0    |
| 1/19/2021 20:45:00 | 0    |
| 1/19/2021 21:15:00 | 0    |
| 1/19/2021 21:45:00 | 0    |
| 1/19/2021 22:15:00 | 0    |
| 1/19/2021 22:45:00 | 0    |
| 1/19/2021 23:15:00 | 0    |
| 1/19/2021 23:45:00 | 0    |
| 1/20/2021 0:15:00  | 0    |
| 1/20/2021 0:45:00  | 0    |
| 1/20/2021 1:15:00  | 0    |
| 1/20/2021 1:45:00  | 0    |
| 1/20/2021 2:15:00  | 0    |
| 1/20/2021 2:45:00  | 0    |
| 1/20/2021 3:15:00  | 0    |

|                    |      |
|--------------------|------|
| 1/20/2021 3:45:00  | 0    |
| 1/20/2021 4:15:00  | 0    |
| 1/20/2021 4:45:00  | 0    |
| 1/20/2021 5:15:00  | 0    |
| 1/20/2021 5:45:00  | 0    |
| 1/20/2021 6:15:00  | 0    |
| 1/20/2021 6:45:00  | 0    |
| 1/20/2021 7:15:00  | 0    |
| 1/20/2021 7:45:00  | 342  |
| 1/20/2021 8:15:00  | 667  |
| 1/20/2021 8:45:00  | 798  |
| 1/20/2021 9:15:00  | 868  |
| 1/20/2021 9:45:00  | 914  |
| 1/20/2021 10:15:00 | 948  |
| 1/20/2021 10:45:00 | 972  |
| 1/20/2021 11:15:00 | 989  |
| 1/20/2021 11:45:00 | 1000 |
| 1/20/2021 12:15:00 | 1008 |
| 1/20/2021 12:45:00 | 1010 |
| 1/20/2021 13:15:00 | 1009 |
| 1/20/2021 13:45:00 | 1003 |
| 1/20/2021 14:15:00 | 992  |
| 1/20/2021 14:45:00 | 976  |
| 1/20/2021 15:15:00 | 953  |
| 1/20/2021 15:45:00 | 922  |
| 1/20/2021 16:15:00 | 878  |
| 1/20/2021 16:45:00 | 814  |
| 1/20/2021 17:15:00 | 704  |
| 1/20/2021 17:45:00 | 466  |
| 1/20/2021 18:15:00 | 0    |
| 1/20/2021 18:45:00 | 0    |

|                    |     |
|--------------------|-----|
| 1/20/2021 19:15:00 | 0   |
| 1/20/2021 19:45:00 | 0   |
| 1/20/2021 20:15:00 | 0   |
| 1/20/2021 20:45:00 | 0   |
| 1/20/2021 21:15:00 | 0   |
| 1/20/2021 21:45:00 | 0   |
| 1/20/2021 22:15:00 | 0   |
| 1/20/2021 22:45:00 | 0   |
| 1/20/2021 23:15:00 | 0   |
| 1/20/2021 23:45:00 | 0   |
| 1/21/2021 0:15:00  | 0   |
| 1/21/2021 0:45:00  | 0   |
| 1/21/2021 1:15:00  | 0   |
| 1/21/2021 1:45:00  | 0   |
| 1/21/2021 2:15:00  | 0   |
| 1/21/2021 2:45:00  | 0   |
| 1/21/2021 3:15:00  | 0   |
| 1/21/2021 3:45:00  | 0   |
| 1/21/2021 4:15:00  | 0   |
| 1/21/2021 4:45:00  | 0   |
| 1/21/2021 5:15:00  | 0   |
| 1/21/2021 5:45:00  | 0   |
| 1/21/2021 6:15:00  | 0   |
| 1/21/2021 6:45:00  | 0   |
| 1/21/2021 7:15:00  | 0   |
| 1/21/2021 7:45:00  | 293 |
| 1/21/2021 8:15:00  | 624 |
| 1/21/2021 8:45:00  | 793 |
| 1/21/2021 9:15:00  | 867 |
| 1/21/2021 9:45:00  | 915 |
| 1/21/2021 10:15:00 | 948 |

|                    |      |
|--------------------|------|
| 1/21/2021 10:45:00 | 973  |
| 1/21/2021 11:15:00 | 990  |
| 1/21/2021 11:45:00 | 1002 |
| 1/21/2021 12:15:00 | 1002 |
| 1/21/2021 12:45:00 | 1008 |
| 1/21/2021 13:15:00 | 999  |
| 1/21/2021 13:45:00 | 1003 |
| 1/21/2021 14:15:00 | 983  |
| 1/21/2021 14:45:00 | 918  |
| 1/21/2021 15:15:00 | 780  |
| 1/21/2021 15:45:00 | 886  |
| 1/21/2021 16:15:00 | 879  |
| 1/21/2021 16:45:00 | 816  |
| 1/21/2021 17:15:00 | 699  |
| 1/21/2021 17:45:00 | 439  |
| 1/21/2021 18:15:00 | 0    |
| 1/21/2021 18:45:00 | 0    |
| 1/21/2021 19:15:00 | 0    |
| 1/21/2021 19:45:00 | 0    |
| 1/21/2021 20:15:00 | 0    |
| 1/21/2021 20:45:00 | 0    |
| 1/21/2021 21:15:00 | 0    |
| 1/21/2021 21:45:00 | 0    |
| 1/21/2021 22:15:00 | 0    |
| 1/21/2021 22:45:00 | 0    |
| 1/21/2021 23:15:00 | 0    |
| 1/21/2021 23:45:00 | 0    |
| 1/22/2021 0:15:00  | 0    |
| 1/22/2021 0:45:00  | 0    |
| 1/22/2021 1:15:00  | 0    |
| 1/22/2021 1:45:00  | 0    |

|                    |      |
|--------------------|------|
| 1/22/2021 2:15:00  | 0    |
| 1/22/2021 2:45:00  | 0    |
| 1/22/2021 3:15:00  | 0    |
| 1/22/2021 3:45:00  | 0    |
| 1/22/2021 4:15:00  | 0    |
| 1/22/2021 4:45:00  | 0    |
| 1/22/2021 5:15:00  | 0    |
| 1/22/2021 5:45:00  | 0    |
| 1/22/2021 6:15:00  | 0    |
| 1/22/2021 6:45:00  | 0    |
| 1/22/2021 7:15:00  | 0    |
| 1/22/2021 7:45:00  | 254  |
| 1/22/2021 8:15:00  | 531  |
| 1/22/2021 8:45:00  | 799  |
| 1/22/2021 9:15:00  | 869  |
| 1/22/2021 9:45:00  | 915  |
| 1/22/2021 10:15:00 | 949  |
| 1/22/2021 10:45:00 | 973  |
| 1/22/2021 11:15:00 | 990  |
| 1/22/2021 11:45:00 | 1002 |
| 1/22/2021 12:15:00 | 1004 |
| 1/22/2021 12:45:00 | 1009 |
| 1/22/2021 13:15:00 | 1007 |
| 1/22/2021 13:45:00 | 984  |
| 1/22/2021 14:15:00 | 949  |
| 1/22/2021 14:45:00 | 839  |
| 1/22/2021 15:15:00 | 915  |
| 1/22/2021 15:45:00 | 924  |
| 1/22/2021 16:15:00 | 881  |
| 1/22/2021 16:45:00 | 818  |
| 1/22/2021 17:15:00 | 697  |



|                    |     |
|--------------------|-----|
| 1/22/2021 17:45:00 | 450 |
| 1/22/2021 18:15:00 | 0   |
| 1/22/2021 18:45:00 | 0   |
| 1/22/2021 19:15:00 | 0   |
| 1/22/2021 19:45:00 | 0   |
| 1/22/2021 20:15:00 | 0   |
| 1/22/2021 20:45:00 | 0   |
| 1/22/2021 21:15:00 | 0   |
| 1/22/2021 21:45:00 | 0   |
| 1/22/2021 22:15:00 | 0   |
| 1/22/2021 22:45:00 | 0   |
| 1/22/2021 23:15:00 | 0   |
| 1/22/2021 23:45:00 | 0   |
| 1/23/2021 0:15:00  | 0   |
| 1/23/2021 0:45:00  | 0   |
| 1/23/2021 1:15:00  | 0   |
| 1/23/2021 1:45:00  | 0   |
| 1/23/2021 2:15:00  | 0   |
| 1/23/2021 2:45:00  | 0   |
| 1/23/2021 3:15:00  | 0   |
| 1/23/2021 3:45:00  | 0   |
| 1/23/2021 4:15:00  | 0   |
| 1/23/2021 4:45:00  | 0   |
| 1/23/2021 5:15:00  | 0   |
| 1/23/2021 5:45:00  | 0   |
| 1/23/2021 6:15:00  | 0   |
| 1/23/2021 6:45:00  | 0   |
| 1/23/2021 7:15:00  | 0   |
| 1/23/2021 7:45:00  | 256 |
| 1/23/2021 8:15:00  | 532 |
| 1/23/2021 8:45:00  | 799 |

|                    |      |
|--------------------|------|
| 1/23/2021 9:15:00  | 869  |
| 1/23/2021 9:45:00  | 916  |
| 1/23/2021 10:15:00 | 949  |
| 1/23/2021 10:45:00 | 968  |
| 1/23/2021 11:15:00 | 988  |
| 1/23/2021 11:45:00 | 1002 |
| 1/23/2021 12:15:00 | 1009 |
| 1/23/2021 12:45:00 | 1012 |
| 1/23/2021 13:15:00 | 1008 |
| 1/23/2021 13:45:00 | 1003 |
| 1/23/2021 14:15:00 | 994  |
| 1/23/2021 14:45:00 | 631  |
| 1/23/2021 15:15:00 | 0    |
| 1/23/2021 15:45:00 | 629  |
| 1/23/2021 16:15:00 | 882  |
| 1/23/2021 16:45:00 | 820  |
| 1/23/2021 17:15:00 | 713  |
| 1/23/2021 17:45:00 | 462  |
| 1/23/2021 18:15:00 | 0    |
| 1/23/2021 18:45:00 | 0    |
| 1/23/2021 19:15:00 | 0    |
| 1/23/2021 19:45:00 | 0    |
| 1/23/2021 20:15:00 | 0    |
| 1/23/2021 20:45:00 | 0    |
| 1/23/2021 21:15:00 | 0    |
| 1/23/2021 21:45:00 | 0    |
| 1/23/2021 22:15:00 | 0    |
| 1/23/2021 22:45:00 | 0    |
| 1/23/2021 23:15:00 | 0    |
| 1/23/2021 23:45:00 | 0    |
| 1/24/2021 0:15:00  | 0    |

|                    |      |
|--------------------|------|
| 1/24/2021 0:45:00  | 0    |
| 1/24/2021 1:15:00  | 0    |
| 1/24/2021 1:45:00  | 0    |
| 1/24/2021 2:15:00  | 0    |
| 1/24/2021 2:45:00  | 0    |
| 1/24/2021 3:15:00  | 0    |
| 1/24/2021 3:45:00  | 0    |
| 1/24/2021 4:15:00  | 0    |
| 1/24/2021 4:45:00  | 0    |
| 1/24/2021 5:15:00  | 0    |
| 1/24/2021 5:45:00  | 0    |
| 1/24/2021 6:15:00  | 0    |
| 1/24/2021 6:45:00  | 0    |
| 1/24/2021 7:15:00  | 0    |
| 1/24/2021 7:45:00  | 279  |
| 1/24/2021 8:15:00  | 628  |
| 1/24/2021 8:45:00  | 797  |
| 1/24/2021 9:15:00  | 870  |
| 1/24/2021 9:45:00  | 916  |
| 1/24/2021 10:15:00 | 945  |
| 1/24/2021 10:45:00 | 830  |
| 1/24/2021 11:15:00 | 367  |
| 1/24/2021 11:45:00 | 862  |
| 1/24/2021 12:15:00 | 1010 |
| 1/24/2021 12:45:00 | 1012 |
| 1/24/2021 13:15:00 | 1011 |
| 1/24/2021 13:45:00 | 1005 |
| 1/24/2021 14:15:00 | 995  |
| 1/24/2021 14:45:00 | 835  |
| 1/24/2021 15:15:00 | 416  |
| 1/24/2021 15:45:00 | 427  |

|                    |     |
|--------------------|-----|
| 1/24/2021 16:15:00 | 673 |
| 1/24/2021 16:45:00 | 506 |
| 1/24/2021 17:15:00 | 596 |
| 1/24/2021 17:45:00 | 493 |
| 1/24/2021 18:15:00 | 0   |
| 1/24/2021 18:45:00 | 0   |
| 1/24/2021 19:15:00 | 0   |
| 1/24/2021 19:45:00 | 0   |
| 1/24/2021 20:15:00 | 0   |
| 1/24/2021 20:45:00 | 0   |
| 1/24/2021 21:15:00 | 0   |
| 1/24/2021 21:45:00 | 0   |
| 1/24/2021 22:15:00 | 0   |
| 1/24/2021 22:45:00 | 0   |
| 1/24/2021 23:15:00 | 0   |
| 1/24/2021 23:45:00 | 0   |
| 1/25/2021 0:15:00  | 0   |
| 1/25/2021 0:45:00  | 0   |
| 1/25/2021 1:15:00  | 0   |
| 1/25/2021 1:45:00  | 0   |
| 1/25/2021 2:15:00  | 0   |
| 1/25/2021 2:45:00  | 0   |
| 1/25/2021 3:15:00  | 0   |
| 1/25/2021 3:45:00  | 0   |
| 1/25/2021 4:15:00  | 0   |
| 1/25/2021 4:45:00  | 0   |
| 1/25/2021 5:15:00  | 0   |
| 1/25/2021 5:45:00  | 0   |
| 1/25/2021 6:15:00  | 0   |
| 1/25/2021 6:45:00  | 0   |
| 1/25/2021 7:15:00  | 0   |

|                    |      |
|--------------------|------|
| 1/25/2021 7:45:00  | 282  |
| 1/25/2021 8:15:00  | 629  |
| 1/25/2021 8:45:00  | 801  |
| 1/25/2021 9:15:00  | 871  |
| 1/25/2021 9:45:00  | 917  |
| 1/25/2021 10:15:00 | 950  |
| 1/25/2021 10:45:00 | 974  |
| 1/25/2021 11:15:00 | 992  |
| 1/25/2021 11:45:00 | 1003 |
| 1/25/2021 12:15:00 | 1010 |
| 1/25/2021 12:45:00 | 1012 |
| 1/25/2021 13:15:00 | 1011 |
| 1/25/2021 13:45:00 | 1006 |
| 1/25/2021 14:15:00 | 860  |
| 1/25/2021 14:45:00 | 296  |
| 1/25/2021 15:15:00 | 417  |
| 1/25/2021 15:45:00 | 394  |
| 1/25/2021 16:15:00 | 670  |
| 1/25/2021 16:45:00 | 324  |
| 1/25/2021 17:15:00 | 351  |
| 1/25/2021 17:45:00 | 324  |
| 1/25/2021 18:15:00 | 0    |
| 1/25/2021 18:45:00 | 0    |
| 1/25/2021 19:15:00 | 0    |
| 1/25/2021 19:45:00 | 0    |
| 1/25/2021 20:15:00 | 0    |
| 1/25/2021 20:45:00 | 0    |
| 1/25/2021 21:15:00 | 0    |
| 1/25/2021 21:45:00 | 0    |
| 1/25/2021 22:15:00 | 0    |
| 1/25/2021 22:45:00 | 0    |

|                    |      |
|--------------------|------|
| 1/25/2021 23:15:00 | 0    |
| 1/25/2021 23:45:00 | 0    |
| 1/26/2021 0:15:00  | 0    |
| 1/26/2021 0:45:00  | 0    |
| 1/26/2021 1:15:00  | 0    |
| 1/26/2021 1:45:00  | 0    |
| 1/26/2021 2:15:00  | 0    |
| 1/26/2021 2:45:00  | 0    |
| 1/26/2021 3:15:00  | 0    |
| 1/26/2021 3:45:00  | 0    |
| 1/26/2021 4:15:00  | 0    |
| 1/26/2021 4:45:00  | 0    |
| 1/26/2021 5:15:00  | 0    |
| 1/26/2021 5:45:00  | 0    |
| 1/26/2021 6:15:00  | 0    |
| 1/26/2021 6:45:00  | 0    |
| 1/26/2021 7:15:00  | 0    |
| 1/26/2021 7:45:00  | 243  |
| 1/26/2021 8:15:00  | 630  |
| 1/26/2021 8:45:00  | 795  |
| 1/26/2021 9:15:00  | 866  |
| 1/26/2021 9:45:00  | 918  |
| 1/26/2021 10:15:00 | 951  |
| 1/26/2021 10:45:00 | 885  |
| 1/26/2021 11:15:00 | 635  |
| 1/26/2021 11:45:00 | 919  |
| 1/26/2021 12:15:00 | 1010 |
| 1/26/2021 12:45:00 | 931  |
| 1/26/2021 13:15:00 | 758  |
| 1/26/2021 13:45:00 | 876  |
| 1/26/2021 14:15:00 | 951  |

|                    |     |
|--------------------|-----|
| 1/26/2021 14:45:00 | 963 |
| 1/26/2021 15:15:00 | 945 |
| 1/26/2021 15:45:00 | 929 |
| 1/26/2021 16:15:00 | 886 |
| 1/26/2021 16:45:00 | 826 |
| 1/26/2021 17:15:00 | 715 |
| 1/26/2021 17:45:00 | 438 |
| 1/26/2021 18:15:00 | 0   |
| 1/26/2021 18:45:00 | 0   |
| 1/26/2021 19:15:00 | 0   |
| 1/26/2021 19:45:00 | 0   |
| 1/26/2021 20:15:00 | 0   |
| 1/26/2021 20:45:00 | 0   |
| 1/26/2021 21:15:00 | 0   |
| 1/26/2021 21:45:00 | 0   |
| 1/26/2021 22:15:00 | 0   |
| 1/26/2021 22:45:00 | 0   |
| 1/26/2021 23:15:00 | 0   |
| 1/26/2021 23:45:00 | 0   |
| 1/27/2021 0:15:00  | 0   |
| 1/27/2021 0:45:00  | 0   |
| 1/27/2021 1:15:00  | 0   |
| 1/27/2021 1:45:00  | 0   |
| 1/27/2021 2:15:00  | 0   |
| 1/27/2021 2:45:00  | 0   |
| 1/27/2021 3:15:00  | 0   |
| 1/27/2021 3:45:00  | 0   |
| 1/27/2021 4:15:00  | 0   |
| 1/27/2021 4:45:00  | 0   |
| 1/27/2021 5:15:00  | 0   |
| 1/27/2021 5:45:00  | 0   |

|                    |      |
|--------------------|------|
| 1/27/2021 6:15:00  | 0    |
| 1/27/2021 6:45:00  | 0    |
| 1/27/2021 7:15:00  | 0    |
| 1/27/2021 7:45:00  | 248  |
| 1/27/2021 8:15:00  | 623  |
| 1/27/2021 8:45:00  | 789  |
| 1/27/2021 9:15:00  | 861  |
| 1/27/2021 9:45:00  | 871  |
| 1/27/2021 10:15:00 | 831  |
| 1/27/2021 10:45:00 | 749  |
| 1/27/2021 11:15:00 | 888  |
| 1/27/2021 11:45:00 | 1004 |
| 1/27/2021 12:15:00 | 1011 |
| 1/27/2021 12:45:00 | 1013 |
| 1/27/2021 13:15:00 | 1012 |
| 1/27/2021 13:45:00 | 1007 |
| 1/27/2021 14:15:00 | 980  |
| 1/27/2021 14:45:00 | 976  |
| 1/27/2021 15:15:00 | 960  |
| 1/27/2021 15:45:00 | 836  |
| 1/27/2021 16:15:00 | 615  |
| 1/27/2021 16:45:00 | 182  |
| 1/27/2021 17:15:00 | 48   |
| 1/27/2021 17:45:00 | 182  |
| 1/27/2021 18:15:00 | 0    |
| 1/27/2021 18:45:00 | 0    |
| 1/27/2021 19:15:00 | 0    |
| 1/27/2021 19:45:00 | 0    |
| 1/27/2021 20:15:00 | 0    |
| 1/27/2021 20:45:00 | 0    |
| 1/27/2021 21:15:00 | 0    |



|                    |     |
|--------------------|-----|
| 1/27/2021 21:45:00 | 0   |
| 1/27/2021 22:15:00 | 0   |
| 1/27/2021 22:45:00 | 0   |
| 1/27/2021 23:15:00 | 0   |
| 1/27/2021 23:45:00 | 0   |
| 1/28/2021 0:15:00  | 0   |
| 1/28/2021 0:45:00  | 0   |
| 1/28/2021 1:15:00  | 0   |
| 1/28/2021 1:45:00  | 0   |
| 1/28/2021 2:15:00  | 0   |
| 1/28/2021 2:45:00  | 0   |
| 1/28/2021 3:15:00  | 0   |
| 1/28/2021 3:45:00  | 0   |
| 1/28/2021 4:15:00  | 0   |
| 1/28/2021 4:45:00  | 0   |
| 1/28/2021 5:15:00  | 0   |
| 1/28/2021 5:45:00  | 0   |
| 1/28/2021 6:15:00  | 0   |
| 1/28/2021 6:45:00  | 0   |
| 1/28/2021 7:15:00  | 0   |
| 1/28/2021 7:45:00  | 188 |
| 1/28/2021 8:15:00  | 335 |
| 1/28/2021 8:45:00  | 168 |
| 1/28/2021 9:15:00  | 555 |
| 1/28/2021 9:45:00  | 725 |
| 1/28/2021 10:15:00 | 833 |
| 1/28/2021 10:45:00 | 729 |
| 1/28/2021 11:15:00 | 890 |
| 1/28/2021 11:45:00 | 861 |
| 1/28/2021 12:15:00 | 832 |
| 1/28/2021 12:45:00 | 522 |

|                    |     |
|--------------------|-----|
| 1/28/2021 13:15:00 | 868 |
| 1/28/2021 13:45:00 | 957 |
| 1/28/2021 14:15:00 | 908 |
| 1/28/2021 14:45:00 | 912 |
| 1/28/2021 15:15:00 | 731 |
| 1/28/2021 15:45:00 | 353 |
| 1/28/2021 16:15:00 | 131 |
| 1/28/2021 16:45:00 | 144 |
| 1/28/2021 17:15:00 | 154 |
| 1/28/2021 17:45:00 | 234 |
| 1/28/2021 18:15:00 | 0   |
| 1/28/2021 18:45:00 | 0   |
| 1/28/2021 19:15:00 | 0   |
| 1/28/2021 19:45:00 | 0   |
| 1/28/2021 20:15:00 | 0   |
| 1/28/2021 20:45:00 | 0   |
| 1/28/2021 21:15:00 | 0   |
| 1/28/2021 21:45:00 | 0   |
| 1/28/2021 22:15:00 | 0   |
| 1/28/2021 22:45:00 | 0   |
| 1/28/2021 23:15:00 | 0   |
| 1/28/2021 23:45:00 | 0   |
| 1/29/2021 0:15:00  | 0   |
| 1/29/2021 0:45:00  | 0   |
| 1/29/2021 1:15:00  | 0   |
| 1/29/2021 1:45:00  | 0   |
| 1/29/2021 2:15:00  | 0   |
| 1/29/2021 2:45:00  | 0   |
| 1/29/2021 3:15:00  | 0   |
| 1/29/2021 3:45:00  | 0   |
| 1/29/2021 4:15:00  | 0   |

|                    |     |
|--------------------|-----|
| 1/29/2021 4:45:00  | 0   |
| 1/29/2021 5:15:00  | 0   |
| 1/29/2021 5:45:00  | 0   |
| 1/29/2021 6:15:00  | 0   |
| 1/29/2021 6:45:00  | 0   |
| 1/29/2021 7:15:00  | 0   |
| 1/29/2021 7:45:00  | 144 |
| 1/29/2021 8:15:00  | 449 |
| 1/29/2021 8:45:00  | 743 |
| 1/29/2021 9:15:00  | 873 |
| 1/29/2021 9:45:00  | 919 |
| 1/29/2021 10:15:00 | 929 |
| 1/29/2021 10:45:00 | 963 |
| 1/29/2021 11:15:00 | 898 |
| 1/29/2021 11:45:00 | 622 |
| 1/29/2021 12:15:00 | 157 |
| 1/29/2021 12:45:00 | 737 |
| 1/29/2021 13:15:00 | 745 |
| 1/29/2021 13:45:00 | 165 |
| 1/29/2021 14:15:00 | 75  |
| 1/29/2021 14:45:00 | 502 |
| 1/29/2021 15:15:00 | 558 |
| 1/29/2021 15:45:00 | 226 |
| 1/29/2021 16:15:00 | 408 |
| 1/29/2021 16:45:00 | 0   |
| 1/29/2021 17:15:00 | 286 |
| 1/29/2021 17:45:00 | 0   |
| 1/29/2021 18:15:00 | 99  |
| 1/29/2021 18:45:00 | 0   |
| 1/29/2021 19:15:00 | 0   |
| 1/29/2021 19:45:00 | 0   |

|                    |     |
|--------------------|-----|
| 1/29/2021 20:15:00 | 0   |
| 1/29/2021 20:45:00 | 0   |
| 1/29/2021 21:15:00 | 0   |
| 1/29/2021 21:45:00 | 0   |
| 1/29/2021 22:15:00 | 0   |
| 1/29/2021 22:45:00 | 0   |
| 1/29/2021 23:15:00 | 0   |
| 1/29/2021 23:45:00 | 0   |
| 1/30/2021 0:15:00  | 0   |
| 1/30/2021 0:45:00  | 0   |
| 1/30/2021 1:15:00  | 0   |
| 1/30/2021 1:45:00  | 0   |
| 1/30/2021 2:15:00  | 0   |
| 1/30/2021 2:45:00  | 0   |
| 1/30/2021 3:15:00  | 0   |
| 1/30/2021 3:45:00  | 0   |
| 1/30/2021 4:15:00  | 0   |
| 1/30/2021 4:45:00  | 0   |
| 1/30/2021 5:15:00  | 0   |
| 1/30/2021 5:45:00  | 0   |
| 1/30/2021 6:15:00  | 0   |
| 1/30/2021 6:45:00  | 0   |
| 1/30/2021 7:15:00  | 0   |
| 1/30/2021 7:45:00  | 196 |
| 1/30/2021 8:15:00  | 44  |
| 1/30/2021 8:45:00  | 220 |
| 1/30/2021 9:15:00  | 398 |
| 1/30/2021 9:45:00  | 662 |
| 1/30/2021 10:15:00 | 864 |
| 1/30/2021 10:45:00 | 973 |
| 1/30/2021 11:15:00 | 992 |

|                    |      |
|--------------------|------|
| 1/30/2021 11:45:00 | 1006 |
| 1/30/2021 12:15:00 | 1009 |
| 1/30/2021 12:45:00 | 1008 |
| 1/30/2021 13:15:00 | 1013 |
| 1/30/2021 13:45:00 | 1008 |
| 1/30/2021 14:15:00 | 997  |
| 1/30/2021 14:45:00 | 894  |
| 1/30/2021 15:15:00 | 668  |
| 1/30/2021 15:45:00 | 840  |
| 1/30/2021 16:15:00 | 891  |
| 1/30/2021 16:45:00 | 833  |
| 1/30/2021 17:15:00 | 734  |
| 1/30/2021 17:45:00 | 513  |
| 1/30/2021 18:15:00 | 118  |
| 1/30/2021 18:45:00 | 0    |
| 1/30/2021 19:15:00 | 0    |
| 1/30/2021 19:45:00 | 0    |
| 1/30/2021 20:15:00 | 0    |
| 1/30/2021 20:45:00 | 0    |
| 1/30/2021 21:15:00 | 0    |
| 1/30/2021 21:45:00 | 0    |
| 1/30/2021 22:15:00 | 0    |
| 1/30/2021 22:45:00 | 0    |
| 1/30/2021 23:15:00 | 0    |
| 1/30/2021 23:45:00 | 0    |
| 1/31/2021 0:15:00  | 0    |
| 1/31/2021 0:45:00  | 0    |
| 1/31/2021 1:15:00  | 0    |
| 1/31/2021 1:45:00  | 0    |
| 1/31/2021 2:15:00  | 0    |
| 1/31/2021 2:45:00  | 0    |

|                    |      |
|--------------------|------|
| 1/31/2021 3:15:00  | 0    |
| 1/31/2021 3:45:00  | 0    |
| 1/31/2021 4:15:00  | 0    |
| 1/31/2021 4:45:00  | 0    |
| 1/31/2021 5:15:00  | 0    |
| 1/31/2021 5:45:00  | 0    |
| 1/31/2021 6:15:00  | 0    |
| 1/31/2021 6:45:00  | 0    |
| 1/31/2021 7:15:00  | 0    |
| 1/31/2021 7:45:00  | 244  |
| 1/31/2021 8:15:00  | 640  |
| 1/31/2021 8:45:00  | 807  |
| 1/31/2021 9:15:00  | 875  |
| 1/31/2021 9:45:00  | 918  |
| 1/31/2021 10:15:00 | 954  |
| 1/31/2021 10:45:00 | 977  |
| 1/31/2021 11:15:00 | 994  |
| 1/31/2021 11:45:00 | 1006 |
| 1/31/2021 12:15:00 | 1012 |
| 1/31/2021 12:45:00 | 1015 |
| 1/31/2021 13:15:00 | 1014 |
| 1/31/2021 13:45:00 | 1009 |
| 1/31/2021 14:15:00 | 994  |
| 1/31/2021 14:45:00 | 984  |
| 1/31/2021 15:15:00 | 963  |
| 1/31/2021 15:45:00 | 934  |
| 1/31/2021 16:15:00 | 892  |
| 1/31/2021 16:45:00 | 835  |
| 1/31/2021 17:15:00 | 729  |
| 1/31/2021 17:45:00 | 484  |
| 1/31/2021 18:15:00 | 88   |

|                    |     |
|--------------------|-----|
| 1/31/2021 18:45:00 | 0   |
| 1/31/2021 19:15:00 | 0   |
| 1/31/2021 19:45:00 | 0   |
| 1/31/2021 20:15:00 | 0   |
| 1/31/2021 20:45:00 | 0   |
| 1/31/2021 21:15:00 | 0   |
| 1/31/2021 21:45:00 | 0   |
| 1/31/2021 22:15:00 | 0   |
| 1/31/2021 22:45:00 | 0   |
| 1/31/2021 23:15:00 | 0   |
| 1/31/2021 23:45:00 | 0   |
| 2/1/2021 0:15:00   | 0   |
| 2/1/2021 0:45:00   | 0   |
| 2/1/2021 1:15:00   | 0   |
| 2/1/2021 1:45:00   | 0   |
| 2/1/2021 2:15:00   | 0   |
| 2/1/2021 2:45:00   | 0   |
| 2/1/2021 3:15:00   | 0   |
| 2/1/2021 3:45:00   | 0   |
| 2/1/2021 4:15:00   | 0   |
| 2/1/2021 4:45:00   | 0   |
| 2/1/2021 5:15:00   | 0   |
| 2/1/2021 5:45:00   | 0   |
| 2/1/2021 6:15:00   | 0   |
| 2/1/2021 6:45:00   | 0   |
| 2/1/2021 7:15:00   | 0   |
| 2/1/2021 7:45:00   | 0   |
| 2/1/2021 8:15:00   | 372 |
| 2/1/2021 8:45:00   | 730 |
| 2/1/2021 9:15:00   | 849 |
| 2/1/2021 9:45:00   | 889 |

|                   |     |
|-------------------|-----|
| 2/1/2021 10:15:00 | 903 |
| 2/1/2021 10:45:00 | 946 |
| 2/1/2021 11:15:00 | 951 |
| 2/1/2021 11:45:00 | 969 |
| 2/1/2021 12:15:00 | 950 |
| 2/1/2021 12:45:00 | 915 |
| 2/1/2021 13:15:00 | 757 |
| 2/1/2021 13:45:00 | 362 |
| 2/1/2021 14:15:00 | 609 |
| 2/1/2021 14:45:00 | 351 |
| 2/1/2021 15:15:00 | 199 |
| 2/1/2021 15:45:00 | 150 |
| 2/1/2021 16:15:00 | 20  |
| 2/1/2021 16:45:00 | 402 |
| 2/1/2021 17:15:00 | 444 |
| 2/1/2021 17:45:00 | 106 |
| 2/1/2021 18:15:00 | 124 |
| 2/1/2021 18:45:00 | 0   |
| 2/1/2021 19:15:00 | 0   |
| 2/1/2021 19:45:00 | 0   |
| 2/1/2021 20:15:00 | 0   |
| 2/1/2021 20:45:00 | 0   |
| 2/1/2021 21:15:00 | 0   |
| 2/1/2021 21:45:00 | 0   |
| 2/1/2021 22:15:00 | 0   |
| 2/1/2021 22:45:00 | 0   |
| 2/1/2021 23:15:00 | 0   |
| 2/1/2021 23:45:00 | 0   |
| 2/2/2021 0:15:00  | 0   |
| 2/2/2021 0:45:00  | 0   |
| 2/2/2021 1:15:00  | 0   |



|                   |     |
|-------------------|-----|
| 2/2/2021 1:45:00  | 0   |
| 2/2/2021 2:15:00  | 0   |
| 2/2/2021 2:45:00  | 0   |
| 2/2/2021 3:15:00  | 0   |
| 2/2/2021 3:45:00  | 0   |
| 2/2/2021 4:15:00  | 0   |
| 2/2/2021 4:45:00  | 0   |
| 2/2/2021 5:15:00  | 0   |
| 2/2/2021 5:45:00  | 0   |
| 2/2/2021 6:15:00  | 0   |
| 2/2/2021 6:45:00  | 0   |
| 2/2/2021 7:15:00  | 0   |
| 2/2/2021 7:45:00  | 164 |
| 2/2/2021 8:15:00  | 524 |
| 2/2/2021 8:45:00  | 777 |
| 2/2/2021 9:15:00  | 851 |
| 2/2/2021 9:45:00  | 891 |
| 2/2/2021 10:15:00 | 943 |
| 2/2/2021 10:45:00 | 967 |
| 2/2/2021 11:15:00 | 911 |
| 2/2/2021 11:45:00 | 965 |
| 2/2/2021 12:15:00 | 972 |
| 2/2/2021 12:45:00 | 974 |
| 2/2/2021 13:15:00 | 955 |
| 2/2/2021 13:45:00 | 988 |
| 2/2/2021 14:15:00 | 974 |
| 2/2/2021 14:45:00 | 943 |
| 2/2/2021 15:15:00 | 796 |
| 2/2/2021 15:45:00 | 247 |
| 2/2/2021 16:15:00 | 630 |
| 2/2/2021 16:45:00 | 687 |

|                   |     |
|-------------------|-----|
| 2/2/2021 17:15:00 | 638 |
| 2/2/2021 17:45:00 | 503 |
| 2/2/2021 18:15:00 | 177 |
| 2/2/2021 18:45:00 | 0   |
| 2/2/2021 19:15:00 | 0   |
| 2/2/2021 19:45:00 | 0   |
| 2/2/2021 20:15:00 | 0   |
| 2/2/2021 20:45:00 | 0   |
| 2/2/2021 21:15:00 | 0   |
| 2/2/2021 21:45:00 | 0   |
| 2/2/2021 22:15:00 | 0   |
| 2/2/2021 22:45:00 | 0   |
| 2/2/2021 23:15:00 | 0   |
| 2/2/2021 23:45:00 | 0   |
| 2/3/2021 0:15:00  | 0   |
| 2/3/2021 0:45:00  | 0   |
| 2/3/2021 1:15:00  | 0   |
| 2/3/2021 1:45:00  | 0   |
| 2/3/2021 2:15:00  | 0   |
| 2/3/2021 2:45:00  | 0   |
| 2/3/2021 3:15:00  | 0   |
| 2/3/2021 3:45:00  | 0   |
| 2/3/2021 4:15:00  | 0   |
| 2/3/2021 4:45:00  | 0   |
| 2/3/2021 5:15:00  | 0   |
| 2/3/2021 5:45:00  | 0   |
| 2/3/2021 6:15:00  | 0   |
| 2/3/2021 6:45:00  | 0   |
| 2/3/2021 7:15:00  | 0   |
| 2/3/2021 7:45:00  | 50  |
| 2/3/2021 8:15:00  | 251 |

|                   |     |
|-------------------|-----|
| 2/3/2021 8:45:00  | 589 |
| 2/3/2021 9:15:00  | 355 |
| 2/3/2021 9:45:00  | 205 |
| 2/3/2021 10:15:00 | 639 |
| 2/3/2021 10:45:00 | 700 |
| 2/3/2021 11:15:00 | 844 |
| 2/3/2021 11:45:00 | 926 |
| 2/3/2021 12:15:00 | 956 |
| 2/3/2021 12:45:00 | 930 |
| 2/3/2021 13:15:00 | 970 |
| 2/3/2021 13:45:00 | 910 |
| 2/3/2021 14:15:00 | 845 |
| 2/3/2021 14:45:00 | 391 |
| 2/3/2021 15:15:00 | 613 |
| 2/3/2021 15:45:00 | 13  |
| 2/3/2021 16:15:00 | 0   |
| 2/3/2021 16:45:00 | 272 |
| 2/3/2021 17:15:00 | 25  |
| 2/3/2021 17:45:00 | 78  |
| 2/3/2021 18:15:00 | 107 |
| 2/3/2021 18:45:00 | 0   |
| 2/3/2021 19:15:00 | 0   |
| 2/3/2021 19:45:00 | 0   |
| 2/3/2021 20:15:00 | 0   |
| 2/3/2021 20:45:00 | 0   |
| 2/3/2021 21:15:00 | 0   |
| 2/3/2021 21:45:00 | 0   |
| 2/3/2021 22:15:00 | 0   |
| 2/3/2021 22:45:00 | 0   |
| 2/3/2021 23:15:00 | 0   |
| 2/3/2021 23:45:00 | 0   |

|                   |     |
|-------------------|-----|
| 2/4/2021 0:15:00  | 0   |
| 2/4/2021 0:45:00  | 0   |
| 2/4/2021 1:15:00  | 0   |
| 2/4/2021 1:45:00  | 0   |
| 2/4/2021 2:15:00  | 0   |
| 2/4/2021 2:45:00  | 0   |
| 2/4/2021 3:15:00  | 0   |
| 2/4/2021 3:45:00  | 0   |
| 2/4/2021 4:15:00  | 0   |
| 2/4/2021 4:45:00  | 0   |
| 2/4/2021 5:15:00  | 0   |
| 2/4/2021 5:45:00  | 0   |
| 2/4/2021 6:15:00  | 0   |
| 2/4/2021 6:45:00  | 0   |
| 2/4/2021 7:15:00  | 0   |
| 2/4/2021 7:45:00  | 425 |
| 2/4/2021 8:15:00  | 527 |
| 2/4/2021 8:45:00  | 338 |
| 2/4/2021 9:15:00  | 0   |
| 2/4/2021 9:45:00  | 25  |
| 2/4/2021 10:15:00 | 134 |
| 2/4/2021 10:45:00 | 625 |
| 2/4/2021 11:15:00 | 165 |
| 2/4/2021 11:45:00 | 724 |
| 2/4/2021 12:15:00 | 569 |
| 2/4/2021 12:45:00 | 140 |
| 2/4/2021 13:15:00 | 23  |
| 2/4/2021 13:45:00 | 213 |
| 2/4/2021 14:15:00 | 113 |
| 2/4/2021 14:45:00 | 273 |
| 2/4/2021 15:15:00 | 736 |

|                   |     |
|-------------------|-----|
| 2/4/2021 15:45:00 | 465 |
| 2/4/2021 16:15:00 | 11  |
| 2/4/2021 16:45:00 | 556 |
| 2/4/2021 17:15:00 | 0   |
| 2/4/2021 17:45:00 | 208 |
| 2/4/2021 18:15:00 | 193 |
| 2/4/2021 18:45:00 | 0   |
| 2/4/2021 19:15:00 | 0   |
| 2/4/2021 19:45:00 | 0   |
| 2/4/2021 20:15:00 | 0   |
| 2/4/2021 20:45:00 | 0   |
| 2/4/2021 21:15:00 | 0   |
| 2/4/2021 21:45:00 | 0   |
| 2/4/2021 22:15:00 | 0   |
| 2/4/2021 22:45:00 | 0   |
| 2/4/2021 23:15:00 | 0   |
| 2/4/2021 23:45:00 | 0   |
| 2/5/2021 0:15:00  | 0   |
| 2/5/2021 0:45:00  | 0   |
| 2/5/2021 1:15:00  | 0   |
| 2/5/2021 1:45:00  | 0   |
| 2/5/2021 2:15:00  | 0   |
| 2/5/2021 2:45:00  | 0   |
| 2/5/2021 3:15:00  | 0   |
| 2/5/2021 3:45:00  | 0   |
| 2/5/2021 4:15:00  | 0   |
| 2/5/2021 4:45:00  | 0   |
| 2/5/2021 5:15:00  | 0   |
| 2/5/2021 5:45:00  | 0   |
| 2/5/2021 6:15:00  | 0   |
| 2/5/2021 6:45:00  | 0   |

|                   |     |
|-------------------|-----|
| 2/5/2021 7:15:00  | 0   |
| 2/5/2021 7:45:00  | 418 |
| 2/5/2021 8:15:00  | 647 |
| 2/5/2021 8:45:00  | 773 |
| 2/5/2021 9:15:00  | 849 |
| 2/5/2021 9:45:00  | 911 |
| 2/5/2021 10:15:00 | 945 |
| 2/5/2021 10:45:00 | 902 |
| 2/5/2021 11:15:00 | 850 |
| 2/5/2021 11:45:00 | 813 |
| 2/5/2021 12:15:00 | 550 |
| 2/5/2021 12:45:00 | 819 |
| 2/5/2021 13:15:00 | 105 |
| 2/5/2021 13:45:00 | 44  |
| 2/5/2021 14:15:00 | 325 |
| 2/5/2021 14:45:00 | 830 |
| 2/5/2021 15:15:00 | 860 |
| 2/5/2021 15:45:00 | 888 |
| 2/5/2021 16:15:00 | 784 |
| 2/5/2021 16:45:00 | 500 |
| 2/5/2021 17:15:00 | 54  |
| 2/5/2021 17:45:00 | 41  |
| 2/5/2021 18:15:00 | 113 |
| 2/5/2021 18:45:00 | 0   |
| 2/5/2021 19:15:00 | 0   |
| 2/5/2021 19:45:00 | 0   |
| 2/5/2021 20:15:00 | 0   |
| 2/5/2021 20:45:00 | 0   |
| 2/5/2021 21:15:00 | 0   |
| 2/5/2021 21:45:00 | 0   |
| 2/5/2021 22:15:00 | 0   |

|                   |     |
|-------------------|-----|
| 2/5/2021 22:45:00 | 0   |
| 2/5/2021 23:15:00 | 0   |
| 2/5/2021 23:45:00 | 0   |
| 2/6/2021 0:15:00  | 0   |
| 2/6/2021 0:45:00  | 0   |
| 2/6/2021 1:15:00  | 0   |
| 2/6/2021 1:45:00  | 0   |
| 2/6/2021 2:15:00  | 0   |
| 2/6/2021 2:45:00  | 0   |
| 2/6/2021 3:15:00  | 0   |
| 2/6/2021 3:45:00  | 0   |
| 2/6/2021 4:15:00  | 0   |
| 2/6/2021 4:45:00  | 0   |
| 2/6/2021 5:15:00  | 0   |
| 2/6/2021 5:45:00  | 0   |
| 2/6/2021 6:15:00  | 0   |
| 2/6/2021 6:45:00  | 0   |
| 2/6/2021 7:15:00  | 0   |
| 2/6/2021 7:45:00  | 291 |
| 2/6/2021 8:15:00  | 525 |
| 2/6/2021 8:45:00  | 560 |
| 2/6/2021 9:15:00  | 425 |
| 2/6/2021 9:45:00  | 340 |
| 2/6/2021 10:15:00 | 106 |
| 2/6/2021 10:45:00 | 679 |
| 2/6/2021 11:15:00 | 637 |
| 2/6/2021 11:45:00 | 322 |
| 2/6/2021 12:15:00 | 338 |
| 2/6/2021 12:45:00 | 14  |
| 2/6/2021 13:15:00 | 11  |
| 2/6/2021 13:45:00 | 5   |

|                   |     |
|-------------------|-----|
| 2/6/2021 14:15:00 | 237 |
| 2/6/2021 14:45:00 | 372 |
| 2/6/2021 15:15:00 | 290 |
| 2/6/2021 15:45:00 | 93  |
| 2/6/2021 16:15:00 | 39  |
| 2/6/2021 16:45:00 | 0   |
| 2/6/2021 17:15:00 | 0   |
| 2/6/2021 17:45:00 | 328 |
| 2/6/2021 18:15:00 | 206 |
| 2/6/2021 18:45:00 | 0   |
| 2/6/2021 19:15:00 | 0   |
| 2/6/2021 19:45:00 | 0   |
| 2/6/2021 20:15:00 | 0   |
| 2/6/2021 20:45:00 | 0   |
| 2/6/2021 21:15:00 | 0   |
| 2/6/2021 21:45:00 | 0   |
| 2/6/2021 22:15:00 | 0   |
| 2/6/2021 22:45:00 | 0   |
| 2/6/2021 23:15:00 | 0   |
| 2/6/2021 23:45:00 | 0   |
| 2/7/2021 0:15:00  | 0   |
| 2/7/2021 0:45:00  | 0   |
| 2/7/2021 1:15:00  | 0   |
| 2/7/2021 1:45:00  | 0   |
| 2/7/2021 2:15:00  | 0   |
| 2/7/2021 2:45:00  | 0   |
| 2/7/2021 3:15:00  | 0   |
| 2/7/2021 3:45:00  | 0   |
| 2/7/2021 4:15:00  | 0   |
| 2/7/2021 4:45:00  | 0   |
| 2/7/2021 5:15:00  | 0   |



|                   |     |
|-------------------|-----|
| 2/7/2021 5:45:00  | 0   |
| 2/7/2021 6:15:00  | 0   |
| 2/7/2021 6:45:00  | 0   |
| 2/7/2021 7:15:00  | 0   |
| 2/7/2021 7:45:00  | 385 |
| 2/7/2021 8:15:00  | 676 |
| 2/7/2021 8:45:00  | 797 |
| 2/7/2021 9:15:00  | 866 |
| 2/7/2021 9:45:00  | 911 |
| 2/7/2021 10:15:00 | 946 |
| 2/7/2021 10:45:00 | 970 |
| 2/7/2021 11:15:00 | 972 |
| 2/7/2021 11:45:00 | 972 |
| 2/7/2021 12:15:00 | 979 |
| 2/7/2021 12:45:00 | 980 |
| 2/7/2021 13:15:00 | 988 |
| 2/7/2021 13:45:00 | 985 |
| 2/7/2021 14:15:00 | 978 |
| 2/7/2021 14:45:00 | 960 |
| 2/7/2021 15:15:00 | 856 |
| 2/7/2021 15:45:00 | 598 |
| 2/7/2021 16:15:00 | 21  |
| 2/7/2021 16:45:00 | 172 |
| 2/7/2021 17:15:00 | 14  |
| 2/7/2021 17:45:00 | 288 |
| 2/7/2021 18:15:00 | 207 |
| 2/7/2021 18:45:00 | 0   |
| 2/7/2021 19:15:00 | 0   |
| 2/7/2021 19:45:00 | 0   |
| 2/7/2021 20:15:00 | 0   |
| 2/7/2021 20:45:00 | 0   |

|                   |     |
|-------------------|-----|
| 2/7/2021 21:15:00 | 0   |
| 2/7/2021 21:45:00 | 0   |
| 2/7/2021 22:15:00 | 0   |
| 2/7/2021 22:45:00 | 0   |
| 2/7/2021 23:15:00 | 0   |
| 2/7/2021 23:45:00 | 0   |
| 2/8/2021 0:15:00  | 0   |
| 2/8/2021 0:45:00  | 0   |
| 2/8/2021 1:15:00  | 0   |
| 2/8/2021 1:45:00  | 0   |
| 2/8/2021 2:15:00  | 0   |
| 2/8/2021 2:45:00  | 0   |
| 2/8/2021 3:15:00  | 0   |
| 2/8/2021 3:45:00  | 0   |
| 2/8/2021 4:15:00  | 0   |
| 2/8/2021 4:45:00  | 0   |
| 2/8/2021 5:15:00  | 0   |
| 2/8/2021 5:45:00  | 0   |
| 2/8/2021 6:15:00  | 0   |
| 2/8/2021 6:45:00  | 0   |
| 2/8/2021 7:15:00  | 0   |
| 2/8/2021 7:45:00  | 432 |
| 2/8/2021 8:15:00  | 678 |
| 2/8/2021 8:45:00  | 776 |
| 2/8/2021 9:15:00  | 867 |
| 2/8/2021 9:45:00  | 914 |
| 2/8/2021 10:15:00 | 947 |
| 2/8/2021 10:45:00 | 971 |
| 2/8/2021 11:15:00 | 989 |
| 2/8/2021 11:45:00 | 980 |
| 2/8/2021 12:15:00 | 989 |

|                   |     |
|-------------------|-----|
| 2/8/2021 12:45:00 | 974 |
| 2/8/2021 13:15:00 | 983 |
| 2/8/2021 13:45:00 | 860 |
| 2/8/2021 14:15:00 | 331 |
| 2/8/2021 14:45:00 | 165 |
| 2/8/2021 15:15:00 | 70  |
| 2/8/2021 15:45:00 | 715 |
| 2/8/2021 16:15:00 | 661 |
| 2/8/2021 16:45:00 | 751 |
| 2/8/2021 17:15:00 | 724 |
| 2/8/2021 17:45:00 | 527 |
| 2/8/2021 18:15:00 | 231 |
| 2/8/2021 18:45:00 | 0   |
| 2/8/2021 19:15:00 | 0   |
| 2/8/2021 19:45:00 | 0   |
| 2/8/2021 20:15:00 | 0   |
| 2/8/2021 20:45:00 | 0   |
| 2/8/2021 21:15:00 | 0   |
| 2/8/2021 21:45:00 | 0   |
| 2/8/2021 22:15:00 | 0   |
| 2/8/2021 22:45:00 | 0   |
| 2/8/2021 23:15:00 | 0   |
| 2/8/2021 23:45:00 | 0   |
| 2/9/2021 0:15:00  | 0   |
| 2/9/2021 0:45:00  | 0   |
| 2/9/2021 1:15:00  | 0   |
| 2/9/2021 1:45:00  | 0   |
| 2/9/2021 2:15:00  | 0   |
| 2/9/2021 2:45:00  | 0   |
| 2/9/2021 3:15:00  | 0   |
| 2/9/2021 3:45:00  | 0   |

|                   |      |
|-------------------|------|
| 2/9/2021 4:15:00  | 0    |
| 2/9/2021 4:45:00  | 0    |
| 2/9/2021 5:15:00  | 0    |
| 2/9/2021 5:45:00  | 0    |
| 2/9/2021 6:15:00  | 0    |
| 2/9/2021 6:45:00  | 0    |
| 2/9/2021 7:15:00  | 0    |
| 2/9/2021 7:45:00  | 248  |
| 2/9/2021 8:15:00  | 641  |
| 2/9/2021 8:45:00  | 783  |
| 2/9/2021 9:15:00  | 822  |
| 2/9/2021 9:45:00  | 913  |
| 2/9/2021 10:15:00 | 948  |
| 2/9/2021 10:45:00 | 972  |
| 2/9/2021 11:15:00 | 914  |
| 2/9/2021 11:45:00 | 989  |
| 2/9/2021 12:15:00 | 1006 |
| 2/9/2021 12:45:00 | 991  |
| 2/9/2021 13:15:00 | 1008 |
| 2/9/2021 13:45:00 | 999  |
| 2/9/2021 14:15:00 | 953  |
| 2/9/2021 14:45:00 | 951  |
| 2/9/2021 15:15:00 | 918  |
| 2/9/2021 15:45:00 | 897  |
| 2/9/2021 16:15:00 | 850  |
| 2/9/2021 16:45:00 | 772  |
| 2/9/2021 17:15:00 | 698  |
| 2/9/2021 17:45:00 | 535  |
| 2/9/2021 18:15:00 | 212  |
| 2/9/2021 18:45:00 | 0    |
| 2/9/2021 19:15:00 | 0    |

|                    |     |
|--------------------|-----|
| 2/9/2021 19:45:00  | 0   |
| 2/9/2021 20:15:00  | 0   |
| 2/9/2021 20:45:00  | 0   |
| 2/9/2021 21:15:00  | 0   |
| 2/9/2021 21:45:00  | 0   |
| 2/9/2021 22:15:00  | 0   |
| 2/9/2021 22:45:00  | 0   |
| 2/9/2021 23:15:00  | 0   |
| 2/9/2021 23:45:00  | 0   |
| 2/10/2021 0:15:00  | 0   |
| 2/10/2021 0:45:00  | 0   |
| 2/10/2021 1:15:00  | 0   |
| 2/10/2021 1:45:00  | 0   |
| 2/10/2021 2:15:00  | 0   |
| 2/10/2021 2:45:00  | 0   |
| 2/10/2021 3:15:00  | 0   |
| 2/10/2021 3:45:00  | 0   |
| 2/10/2021 4:15:00  | 0   |
| 2/10/2021 4:45:00  | 0   |
| 2/10/2021 5:15:00  | 0   |
| 2/10/2021 5:45:00  | 0   |
| 2/10/2021 6:15:00  | 0   |
| 2/10/2021 6:45:00  | 0   |
| 2/10/2021 7:15:00  | 0   |
| 2/10/2021 7:45:00  | 365 |
| 2/10/2021 8:15:00  | 680 |
| 2/10/2021 8:45:00  | 785 |
| 2/10/2021 9:15:00  | 850 |
| 2/10/2021 9:45:00  | 896 |
| 2/10/2021 10:15:00 | 948 |
| 2/10/2021 10:45:00 | 964 |

|                    |      |
|--------------------|------|
| 2/10/2021 11:15:00 | 983  |
| 2/10/2021 11:45:00 | 986  |
| 2/10/2021 12:15:00 | 1005 |
| 2/10/2021 12:45:00 | 997  |
| 2/10/2021 13:15:00 | 924  |
| 2/10/2021 13:45:00 | 625  |
| 2/10/2021 14:15:00 | 890  |
| 2/10/2021 14:45:00 | 970  |
| 2/10/2021 15:15:00 | 950  |
| 2/10/2021 15:45:00 | 930  |
| 2/10/2021 16:15:00 | 883  |
| 2/10/2021 16:45:00 | 804  |
| 2/10/2021 17:15:00 | 692  |
| 2/10/2021 17:45:00 | 508  |
| 2/10/2021 18:15:00 | 242  |
| 2/10/2021 18:45:00 | 0    |
| 2/10/2021 19:15:00 | 0    |
| 2/10/2021 19:45:00 | 0    |
| 2/10/2021 20:15:00 | 0    |
| 2/10/2021 20:45:00 | 0    |
| 2/10/2021 21:15:00 | 0    |
| 2/10/2021 21:45:00 | 0    |
| 2/10/2021 22:15:00 | 0    |
| 2/10/2021 22:45:00 | 0    |
| 2/10/2021 23:15:00 | 0    |
| 2/10/2021 23:45:00 | 0    |
| 2/11/2021 0:15:00  | 0    |
| 2/11/2021 0:45:00  | 0    |
| 2/11/2021 1:15:00  | 0    |
| 2/11/2021 1:45:00  | 0    |
| 2/11/2021 2:15:00  | 0    |

|                    |     |
|--------------------|-----|
| 2/11/2021 2:45:00  | 0   |
| 2/11/2021 3:15:00  | 0   |
| 2/11/2021 3:45:00  | 0   |
| 2/11/2021 4:15:00  | 0   |
| 2/11/2021 4:45:00  | 0   |
| 2/11/2021 5:15:00  | 0   |
| 2/11/2021 5:45:00  | 0   |
| 2/11/2021 6:15:00  | 0   |
| 2/11/2021 6:45:00  | 0   |
| 2/11/2021 7:15:00  | 0   |
| 2/11/2021 7:45:00  | 149 |
| 2/11/2021 8:15:00  | 558 |
| 2/11/2021 8:45:00  | 790 |
| 2/11/2021 9:15:00  | 844 |
| 2/11/2021 9:45:00  | 850 |
| 2/11/2021 10:15:00 | 906 |
| 2/11/2021 10:45:00 | 900 |
| 2/11/2021 11:15:00 | 963 |
| 2/11/2021 11:45:00 | 962 |
| 2/11/2021 12:15:00 | 986 |
| 2/11/2021 12:45:00 | 980 |
| 2/11/2021 13:15:00 | 906 |
| 2/11/2021 13:45:00 | 530 |
| 2/11/2021 14:15:00 | 646 |
| 2/11/2021 14:45:00 | 267 |
| 2/11/2021 15:15:00 | 725 |
| 2/11/2021 15:45:00 | 574 |
| 2/11/2021 16:15:00 | 296 |
| 2/11/2021 16:45:00 | 622 |
| 2/11/2021 17:15:00 | 213 |
| 2/11/2021 17:45:00 | 330 |

|                    |     |
|--------------------|-----|
| 2/11/2021 18:15:00 | 155 |
| 2/11/2021 18:45:00 | 0   |
| 2/11/2021 19:15:00 | 0   |
| 2/11/2021 19:45:00 | 0   |
| 2/11/2021 20:15:00 | 0   |
| 2/11/2021 20:45:00 | 0   |
| 2/11/2021 21:15:00 | 0   |
| 2/11/2021 21:45:00 | 0   |
| 2/11/2021 22:15:00 | 0   |
| 2/11/2021 22:45:00 | 0   |
| 2/11/2021 23:15:00 | 0   |
| 2/11/2021 23:45:00 | 0   |
| 2/12/2021 0:15:00  | 0   |
| 2/12/2021 0:45:00  | 0   |
| 2/12/2021 1:15:00  | 0   |
| 2/12/2021 1:45:00  | 0   |
| 2/12/2021 2:15:00  | 0   |
| 2/12/2021 2:45:00  | 0   |
| 2/12/2021 3:15:00  | 0   |
| 2/12/2021 3:45:00  | 0   |
| 2/12/2021 4:15:00  | 0   |
| 2/12/2021 4:45:00  | 0   |
| 2/12/2021 5:15:00  | 0   |
| 2/12/2021 5:45:00  | 0   |
| 2/12/2021 6:15:00  | 0   |
| 2/12/2021 6:45:00  | 0   |
| 2/12/2021 7:15:00  | 0   |
| 2/12/2021 7:45:00  | 305 |
| 2/12/2021 8:15:00  | 649 |
| 2/12/2021 8:45:00  | 774 |
| 2/12/2021 9:15:00  | 831 |



|                    |     |
|--------------------|-----|
| 2/12/2021 9:45:00  | 775 |
| 2/12/2021 10:15:00 | 903 |
| 2/12/2021 10:45:00 | 943 |
| 2/12/2021 11:15:00 | 955 |
| 2/12/2021 11:45:00 | 964 |
| 2/12/2021 12:15:00 | 980 |
| 2/12/2021 12:45:00 | 860 |
| 2/12/2021 13:15:00 | 342 |
| 2/12/2021 13:45:00 | 578 |
| 2/12/2021 14:15:00 | 314 |
| 2/12/2021 14:45:00 | 5   |
| 2/12/2021 15:15:00 | 0   |
| 2/12/2021 15:45:00 | 225 |
| 2/12/2021 16:15:00 | 96  |
| 2/12/2021 16:45:00 | 136 |
| 2/12/2021 17:15:00 | 0   |
| 2/12/2021 17:45:00 | 29  |
| 2/12/2021 18:15:00 | 120 |
| 2/12/2021 18:45:00 | 0   |
| 2/12/2021 19:15:00 | 0   |
| 2/12/2021 19:45:00 | 0   |
| 2/12/2021 20:15:00 | 0   |
| 2/12/2021 20:45:00 | 0   |
| 2/12/2021 21:15:00 | 0   |
| 2/12/2021 21:45:00 | 0   |
| 2/12/2021 22:15:00 | 0   |
| 2/12/2021 22:45:00 | 0   |
| 2/12/2021 23:15:00 | 0   |
| 2/12/2021 23:45:00 | 0   |
| 2/13/2021 0:15:00  | 0   |
| 2/13/2021 0:45:00  | 0   |

|                    |      |
|--------------------|------|
| 2/13/2021 1:15:00  | 0    |
| 2/13/2021 1:45:00  | 0    |
| 2/13/2021 2:15:00  | 0    |
| 2/13/2021 2:45:00  | 0    |
| 2/13/2021 3:15:00  | 0    |
| 2/13/2021 3:45:00  | 0    |
| 2/13/2021 4:15:00  | 0    |
| 2/13/2021 4:45:00  | 0    |
| 2/13/2021 5:15:00  | 0    |
| 2/13/2021 5:45:00  | 0    |
| 2/13/2021 6:15:00  | 0    |
| 2/13/2021 6:45:00  | 0    |
| 2/13/2021 7:15:00  | 0    |
| 2/13/2021 7:45:00  | 331  |
| 2/13/2021 8:15:00  | 648  |
| 2/13/2021 8:45:00  | 795  |
| 2/13/2021 9:15:00  | 840  |
| 2/13/2021 9:45:00  | 854  |
| 2/13/2021 10:15:00 | 906  |
| 2/13/2021 10:45:00 | 948  |
| 2/13/2021 11:15:00 | 976  |
| 2/13/2021 11:45:00 | 999  |
| 2/13/2021 12:15:00 | 1004 |
| 2/13/2021 12:45:00 | 1008 |
| 2/13/2021 13:15:00 | 1009 |
| 2/13/2021 13:45:00 | 990  |
| 2/13/2021 14:15:00 | 974  |
| 2/13/2021 14:45:00 | 940  |
| 2/13/2021 15:15:00 | 900  |
| 2/13/2021 15:45:00 | 868  |
| 2/13/2021 16:15:00 | 793  |

|                    |     |
|--------------------|-----|
| 2/13/2021 16:45:00 | 560 |
| 2/13/2021 17:15:00 | 597 |
| 2/13/2021 17:45:00 | 232 |
| 2/13/2021 18:15:00 | 177 |
| 2/13/2021 18:45:00 | 0   |
| 2/13/2021 19:15:00 | 0   |
| 2/13/2021 19:45:00 | 0   |
| 2/13/2021 20:15:00 | 0   |
| 2/13/2021 20:45:00 | 0   |
| 2/13/2021 21:15:00 | 0   |
| 2/13/2021 21:45:00 | 0   |
| 2/13/2021 22:15:00 | 0   |
| 2/13/2021 22:45:00 | 0   |
| 2/13/2021 23:15:00 | 0   |
| 2/13/2021 23:45:00 | 0   |
| 2/14/2021 0:15:00  | 0   |
| 2/14/2021 0:45:00  | 0   |
| 2/14/2021 1:15:00  | 0   |
| 2/14/2021 1:45:00  | 0   |
| 2/14/2021 2:15:00  | 0   |
| 2/14/2021 2:45:00  | 0   |
| 2/14/2021 3:15:00  | 0   |
| 2/14/2021 3:45:00  | 0   |
| 2/14/2021 4:15:00  | 0   |
| 2/14/2021 4:45:00  | 0   |
| 2/14/2021 5:15:00  | 0   |
| 2/14/2021 5:45:00  | 0   |
| 2/14/2021 6:15:00  | 0   |
| 2/14/2021 6:45:00  | 0   |
| 2/14/2021 7:15:00  | 0   |
| 2/14/2021 7:45:00  | 318 |

|                    |      |
|--------------------|------|
| 2/14/2021 8:15:00  | 656  |
| 2/14/2021 8:45:00  | 790  |
| 2/14/2021 9:15:00  | 860  |
| 2/14/2021 9:45:00  | 897  |
| 2/14/2021 10:15:00 | 907  |
| 2/14/2021 10:45:00 | 908  |
| 2/14/2021 11:15:00 | 987  |
| 2/14/2021 11:45:00 | 988  |
| 2/14/2021 12:15:00 | 1008 |
| 2/14/2021 12:45:00 | 1011 |
| 2/14/2021 13:15:00 | 994  |
| 2/14/2021 13:45:00 | 1005 |
| 2/14/2021 14:15:00 | 996  |
| 2/14/2021 14:45:00 | 982  |
| 2/14/2021 15:15:00 | 961  |
| 2/14/2021 15:45:00 | 933  |
| 2/14/2021 16:15:00 | 894  |
| 2/14/2021 16:45:00 | 839  |
| 2/14/2021 17:15:00 | 754  |
| 2/14/2021 17:45:00 | 590  |
| 2/14/2021 18:15:00 | 268  |
| 2/14/2021 18:45:00 | 0    |
| 2/14/2021 19:15:00 | 0    |
| 2/14/2021 19:45:00 | 0    |
| 2/14/2021 20:15:00 | 0    |
| 2/14/2021 20:45:00 | 0    |
| 2/14/2021 21:15:00 | 0    |
| 2/14/2021 21:45:00 | 0    |
| 2/14/2021 22:15:00 | 0    |
| 2/14/2021 22:45:00 | 0    |
| 2/14/2021 23:15:00 | 0    |

|                    |      |
|--------------------|------|
| 2/14/2021 23:45:00 | 0    |
| 2/15/2021 0:15:00  | 0    |
| 2/15/2021 0:45:00  | 0    |
| 2/15/2021 1:15:00  | 0    |
| 2/15/2021 1:45:00  | 0    |
| 2/15/2021 2:15:00  | 0    |
| 2/15/2021 2:45:00  | 0    |
| 2/15/2021 3:15:00  | 0    |
| 2/15/2021 3:45:00  | 0    |
| 2/15/2021 4:15:00  | 0    |
| 2/15/2021 4:45:00  | 0    |
| 2/15/2021 5:15:00  | 0    |
| 2/15/2021 5:45:00  | 0    |
| 2/15/2021 6:15:00  | 0    |
| 2/15/2021 6:45:00  | 0    |
| 2/15/2021 7:15:00  | 0    |
| 2/15/2021 7:45:00  | 311  |
| 2/15/2021 8:15:00  | 656  |
| 2/15/2021 8:45:00  | 791  |
| 2/15/2021 9:15:00  | 820  |
| 2/15/2021 9:45:00  | 850  |
| 2/15/2021 10:15:00 | 908  |
| 2/15/2021 10:45:00 | 943  |
| 2/15/2021 11:15:00 | 966  |
| 2/15/2021 11:45:00 | 1002 |
| 2/15/2021 12:15:00 | 1003 |
| 2/15/2021 12:45:00 | 1011 |
| 2/15/2021 13:15:00 | 1000 |
| 2/15/2021 13:45:00 | 1005 |
| 2/15/2021 14:15:00 | 997  |
| 2/15/2021 14:45:00 | 978  |

|                    |     |
|--------------------|-----|
| 2/15/2021 15:15:00 | 962 |
| 2/15/2021 15:45:00 | 934 |
| 2/15/2021 16:15:00 | 895 |
| 2/15/2021 16:45:00 | 841 |
| 2/15/2021 17:15:00 | 743 |
| 2/15/2021 17:45:00 | 550 |
| 2/15/2021 18:15:00 | 264 |
| 2/15/2021 18:45:00 | 0   |
| 2/15/2021 19:15:00 | 0   |
| 2/15/2021 19:45:00 | 0   |
| 2/15/2021 20:15:00 | 0   |
| 2/15/2021 20:45:00 | 0   |
| 2/15/2021 21:15:00 | 0   |
| 2/15/2021 21:45:00 | 0   |
| 2/15/2021 22:15:00 | 0   |
| 2/15/2021 22:45:00 | 0   |
| 2/15/2021 23:15:00 | 0   |
| 2/15/2021 23:45:00 | 0   |
| 2/16/2021 0:15:00  | 0   |
| 2/16/2021 0:45:00  | 0   |
| 2/16/2021 1:15:00  | 0   |
| 2/16/2021 1:45:00  | 0   |
| 2/16/2021 2:15:00  | 0   |
| 2/16/2021 2:45:00  | 0   |
| 2/16/2021 3:15:00  | 0   |
| 2/16/2021 3:45:00  | 0   |
| 2/16/2021 4:15:00  | 0   |
| 2/16/2021 4:45:00  | 0   |
| 2/16/2021 5:15:00  | 0   |
| 2/16/2021 5:45:00  | 0   |
| 2/16/2021 6:15:00  | 0   |

|                    |      |
|--------------------|------|
| 2/16/2021 6:45:00  | 0    |
| 2/16/2021 7:15:00  | 0    |
| 2/16/2021 7:45:00  | 349  |
| 2/16/2021 8:15:00  | 663  |
| 2/16/2021 8:45:00  | 802  |
| 2/16/2021 9:15:00  | 857  |
| 2/16/2021 9:45:00  | 883  |
| 2/16/2021 10:15:00 | 934  |
| 2/16/2021 10:45:00 | 945  |
| 2/16/2021 11:15:00 | 969  |
| 2/16/2021 11:45:00 | 1003 |
| 2/16/2021 12:15:00 | 1009 |
| 2/16/2021 12:45:00 | 1011 |
| 2/16/2021 13:15:00 | 1009 |
| 2/16/2021 13:45:00 | 1000 |
| 2/16/2021 14:15:00 | 997  |
| 2/16/2021 14:45:00 | 970  |
| 2/16/2021 15:15:00 | 962  |
| 2/16/2021 15:45:00 | 935  |
| 2/16/2021 16:15:00 | 896  |
| 2/16/2021 16:45:00 | 839  |
| 2/16/2021 17:15:00 | 743  |
| 2/16/2021 17:45:00 | 583  |
| 2/16/2021 18:15:00 | 271  |
| 2/16/2021 18:45:00 | 0    |
| 2/16/2021 19:15:00 | 0    |
| 2/16/2021 19:45:00 | 0    |
| 2/16/2021 20:15:00 | 0    |
| 2/16/2021 20:45:00 | 0    |
| 2/16/2021 21:15:00 | 0    |
| 2/16/2021 21:45:00 | 0    |

|                    |      |
|--------------------|------|
| 2/16/2021 22:15:00 | 0    |
| 2/16/2021 22:45:00 | 0    |
| 2/16/2021 23:15:00 | 0    |
| 2/16/2021 23:45:00 | 0    |
| 2/17/2021 0:15:00  | 0    |
| 2/17/2021 0:45:00  | 0    |
| 2/17/2021 1:15:00  | 0    |
| 2/17/2021 1:45:00  | 0    |
| 2/17/2021 2:15:00  | 0    |
| 2/17/2021 2:45:00  | 0    |
| 2/17/2021 3:15:00  | 0    |
| 2/17/2021 3:45:00  | 0    |
| 2/17/2021 4:15:00  | 0    |
| 2/17/2021 4:45:00  | 0    |
| 2/17/2021 5:15:00  | 0    |
| 2/17/2021 5:45:00  | 0    |
| 2/17/2021 6:15:00  | 0    |
| 2/17/2021 6:45:00  | 0    |
| 2/17/2021 7:15:00  | 0    |
| 2/17/2021 7:45:00  | 341  |
| 2/17/2021 8:15:00  | 662  |
| 2/17/2021 8:45:00  | 805  |
| 2/17/2021 9:15:00  | 852  |
| 2/17/2021 9:45:00  | 862  |
| 2/17/2021 10:15:00 | 911  |
| 2/17/2021 10:45:00 | 957  |
| 2/17/2021 11:15:00 | 962  |
| 2/17/2021 11:45:00 | 1003 |
| 2/17/2021 12:15:00 | 1003 |
| 2/17/2021 12:45:00 | 1012 |
| 2/17/2021 13:15:00 | 1000 |



|                    |     |
|--------------------|-----|
| 2/17/2021 13:45:00 | 991 |
| 2/17/2021 14:15:00 | 984 |
| 2/17/2021 14:45:00 | 984 |
| 2/17/2021 15:15:00 | 959 |
| 2/17/2021 15:45:00 | 935 |
| 2/17/2021 16:15:00 | 897 |
| 2/17/2021 16:45:00 | 843 |
| 2/17/2021 17:15:00 | 747 |
| 2/17/2021 17:45:00 | 595 |
| 2/17/2021 18:15:00 | 275 |
| 2/17/2021 18:45:00 | 0   |
| 2/17/2021 19:15:00 | 0   |
| 2/17/2021 19:45:00 | 0   |
| 2/17/2021 20:15:00 | 0   |
| 2/17/2021 20:45:00 | 0   |
| 2/17/2021 21:15:00 | 0   |
| 2/17/2021 21:45:00 | 0   |
| 2/17/2021 22:15:00 | 0   |
| 2/17/2021 22:45:00 | 0   |
| 2/17/2021 23:15:00 | 0   |
| 2/17/2021 23:45:00 | 0   |
| 2/18/2021 0:15:00  | 0   |
| 2/18/2021 0:45:00  | 0   |
| 2/18/2021 1:15:00  | 0   |
| 2/18/2021 1:45:00  | 0   |
| 2/18/2021 2:15:00  | 0   |
| 2/18/2021 2:45:00  | 0   |
| 2/18/2021 3:15:00  | 0   |
| 2/18/2021 3:45:00  | 0   |
| 2/18/2021 4:15:00  | 0   |
| 2/18/2021 4:45:00  | 0   |

|                    |      |
|--------------------|------|
| 2/18/2021 5:15:00  | 0    |
| 2/18/2021 5:45:00  | 0    |
| 2/18/2021 6:15:00  | 0    |
| 2/18/2021 6:45:00  | 0    |
| 2/18/2021 7:15:00  | 0    |
| 2/18/2021 7:45:00  | 330  |
| 2/18/2021 8:15:00  | 668  |
| 2/18/2021 8:45:00  | 816  |
| 2/18/2021 9:15:00  | 869  |
| 2/18/2021 9:45:00  | 906  |
| 2/18/2021 10:15:00 | 908  |
| 2/18/2021 10:45:00 | 916  |
| 2/18/2021 11:15:00 | 972  |
| 2/18/2021 11:45:00 | 987  |
| 2/18/2021 12:15:00 | 1010 |
| 2/18/2021 12:45:00 | 1011 |
| 2/18/2021 13:15:00 | 1011 |
| 2/18/2021 13:45:00 | 1006 |
| 2/18/2021 14:15:00 | 998  |
| 2/18/2021 14:45:00 | 984  |
| 2/18/2021 15:15:00 | 961  |
| 2/18/2021 15:45:00 | 934  |
| 2/18/2021 16:15:00 | 896  |
| 2/18/2021 16:45:00 | 829  |
| 2/18/2021 17:15:00 | 740  |
| 2/18/2021 17:45:00 | 546  |
| 2/18/2021 18:15:00 | 263  |
| 2/18/2021 18:45:00 | 0    |
| 2/18/2021 19:15:00 | 0    |
| 2/18/2021 19:45:00 | 0    |
| 2/18/2021 20:15:00 | 0    |

|                    |      |
|--------------------|------|
| 2/18/2021 20:45:00 | 0    |
| 2/18/2021 21:15:00 | 0    |
| 2/18/2021 21:45:00 | 0    |
| 2/18/2021 22:15:00 | 0    |
| 2/18/2021 22:45:00 | 0    |
| 2/18/2021 23:15:00 | 0    |
| 2/18/2021 23:45:00 | 0    |
| 2/19/2021 0:15:00  | 0    |
| 2/19/2021 0:45:00  | 0    |
| 2/19/2021 1:15:00  | 0    |
| 2/19/2021 1:45:00  | 0    |
| 2/19/2021 2:15:00  | 0    |
| 2/19/2021 2:45:00  | 0    |
| 2/19/2021 3:15:00  | 0    |
| 2/19/2021 3:45:00  | 0    |
| 2/19/2021 4:15:00  | 0    |
| 2/19/2021 4:45:00  | 0    |
| 2/19/2021 5:15:00  | 0    |
| 2/19/2021 5:45:00  | 0    |
| 2/19/2021 6:15:00  | 0    |
| 2/19/2021 6:45:00  | 0    |
| 2/19/2021 7:15:00  | 0    |
| 2/19/2021 7:45:00  | 341  |
| 2/19/2021 8:15:00  | 668  |
| 2/19/2021 8:45:00  | 809  |
| 2/19/2021 9:15:00  | 860  |
| 2/19/2021 9:45:00  | 900  |
| 2/19/2021 10:15:00 | 949  |
| 2/19/2021 10:45:00 | 952  |
| 2/19/2021 11:15:00 | 982  |
| 2/19/2021 11:45:00 | 1004 |

|                    |      |
|--------------------|------|
| 2/19/2021 12:15:00 | 1009 |
| 2/19/2021 12:45:00 | 1007 |
| 2/19/2021 13:15:00 | 1011 |
| 2/19/2021 13:45:00 | 1002 |
| 2/19/2021 14:15:00 | 998  |
| 2/19/2021 14:45:00 | 985  |
| 2/19/2021 15:15:00 | 962  |
| 2/19/2021 15:45:00 | 936  |
| 2/19/2021 16:15:00 | 897  |
| 2/19/2021 16:45:00 | 840  |
| 2/19/2021 17:15:00 | 704  |
| 2/19/2021 17:45:00 | 399  |
| 2/19/2021 18:15:00 | 171  |
| 2/19/2021 18:45:00 | 0    |
| 2/19/2021 19:15:00 | 0    |
| 2/19/2021 19:45:00 | 0    |
| 2/19/2021 20:15:00 | 0    |
| 2/19/2021 20:45:00 | 0    |
| 2/19/2021 21:15:00 | 0    |
| 2/19/2021 21:45:00 | 0    |
| 2/19/2021 22:15:00 | 0    |
| 2/19/2021 22:45:00 | 0    |
| 2/19/2021 23:15:00 | 0    |
| 2/19/2021 23:45:00 | 0    |
| 2/20/2021 0:15:00  | 0    |
| 2/20/2021 0:45:00  | 0    |
| 2/20/2021 1:15:00  | 0    |
| 2/20/2021 1:45:00  | 0    |
| 2/20/2021 2:15:00  | 0    |
| 2/20/2021 2:45:00  | 0    |
| 2/20/2021 3:15:00  | 0    |

|                    |      |
|--------------------|------|
| 2/20/2021 3:45:00  | 0    |
| 2/20/2021 4:15:00  | 0    |
| 2/20/2021 4:45:00  | 0    |
| 2/20/2021 5:15:00  | 0    |
| 2/20/2021 5:45:00  | 0    |
| 2/20/2021 6:15:00  | 0    |
| 2/20/2021 6:45:00  | 0    |
| 2/20/2021 7:15:00  | 0    |
| 2/20/2021 7:45:00  | 370  |
| 2/20/2021 8:15:00  | 673  |
| 2/20/2021 8:45:00  | 806  |
| 2/20/2021 9:15:00  | 879  |
| 2/20/2021 9:45:00  | 910  |
| 2/20/2021 10:15:00 | 943  |
| 2/20/2021 10:45:00 | 970  |
| 2/20/2021 11:15:00 | 976  |
| 2/20/2021 11:45:00 | 1004 |
| 2/20/2021 12:15:00 | 1010 |
| 2/20/2021 12:45:00 | 1012 |
| 2/20/2021 13:15:00 | 1011 |
| 2/20/2021 13:45:00 | 1007 |
| 2/20/2021 14:15:00 | 988  |
| 2/20/2021 14:45:00 | 985  |
| 2/20/2021 15:15:00 | 954  |
| 2/20/2021 15:45:00 | 933  |
| 2/20/2021 16:15:00 | 850  |
| 2/20/2021 16:45:00 | 841  |
| 2/20/2021 17:15:00 | 750  |
| 2/20/2021 17:45:00 | 600  |
| 2/20/2021 18:15:00 | 294  |
| 2/20/2021 18:45:00 | 0    |

|                    |     |
|--------------------|-----|
| 2/20/2021 19:15:00 | 0   |
| 2/20/2021 19:45:00 | 0   |
| 2/20/2021 20:15:00 | 0   |
| 2/20/2021 20:45:00 | 0   |
| 2/20/2021 21:15:00 | 0   |
| 2/20/2021 21:45:00 | 0   |
| 2/20/2021 22:15:00 | 0   |
| 2/20/2021 22:45:00 | 0   |
| 2/20/2021 23:15:00 | 0   |
| 2/20/2021 23:45:00 | 0   |
| 2/21/2021 0:15:00  | 0   |
| 2/21/2021 0:45:00  | 0   |
| 2/21/2021 1:15:00  | 0   |
| 2/21/2021 1:45:00  | 0   |
| 2/21/2021 2:15:00  | 0   |
| 2/21/2021 2:45:00  | 0   |
| 2/21/2021 3:15:00  | 0   |
| 2/21/2021 3:45:00  | 0   |
| 2/21/2021 4:15:00  | 0   |
| 2/21/2021 4:45:00  | 0   |
| 2/21/2021 5:15:00  | 0   |
| 2/21/2021 5:45:00  | 0   |
| 2/21/2021 6:15:00  | 0   |
| 2/21/2021 6:45:00  | 0   |
| 2/21/2021 7:15:00  | 0   |
| 2/21/2021 7:45:00  | 363 |
| 2/21/2021 8:15:00  | 675 |
| 2/21/2021 8:45:00  | 801 |
| 2/21/2021 9:15:00  | 870 |
| 2/21/2021 9:45:00  | 870 |
| 2/21/2021 10:15:00 | 912 |

|                    |      |
|--------------------|------|
| 2/21/2021 10:45:00 | 957  |
| 2/21/2021 11:15:00 | 977  |
| 2/21/2021 11:45:00 | 976  |
| 2/21/2021 12:15:00 | 1005 |
| 2/21/2021 12:45:00 | 1013 |
| 2/21/2021 13:15:00 | 982  |
| 2/21/2021 13:45:00 | 993  |
| 2/21/2021 14:15:00 | 969  |
| 2/21/2021 14:45:00 | 951  |
| 2/21/2021 15:15:00 | 965  |
| 2/21/2021 15:45:00 | 850  |
| 2/21/2021 16:15:00 | 686  |
| 2/21/2021 16:45:00 | 704  |
| 2/21/2021 17:15:00 | 623  |
| 2/21/2021 17:45:00 | 568  |
| 2/21/2021 18:15:00 | 270  |
| 2/21/2021 18:45:00 | 0    |
| 2/21/2021 19:15:00 | 0    |
| 2/21/2021 19:45:00 | 0    |
| 2/21/2021 20:15:00 | 0    |
| 2/21/2021 20:45:00 | 0    |
| 2/21/2021 21:15:00 | 0    |
| 2/21/2021 21:45:00 | 0    |
| 2/21/2021 22:15:00 | 0    |
| 2/21/2021 22:45:00 | 0    |
| 2/21/2021 23:15:00 | 0    |
| 2/21/2021 23:45:00 | 0    |
| 2/22/2021 0:15:00  | 0    |
| 2/22/2021 0:45:00  | 0    |
| 2/22/2021 1:15:00  | 0    |
| 2/22/2021 1:45:00  | 0    |

|                    |      |
|--------------------|------|
| 2/22/2021 2:15:00  | 0    |
| 2/22/2021 2:45:00  | 0    |
| 2/22/2021 3:15:00  | 0    |
| 2/22/2021 3:45:00  | 0    |
| 2/22/2021 4:15:00  | 0    |
| 2/22/2021 4:45:00  | 0    |
| 2/22/2021 5:15:00  | 0    |
| 2/22/2021 5:45:00  | 0    |
| 2/22/2021 6:15:00  | 0    |
| 2/22/2021 6:45:00  | 0    |
| 2/22/2021 7:15:00  | 0    |
| 2/22/2021 7:45:00  | 337  |
| 2/22/2021 8:15:00  | 674  |
| 2/22/2021 8:45:00  | 795  |
| 2/22/2021 9:15:00  | 860  |
| 2/22/2021 9:45:00  | 899  |
| 2/22/2021 10:15:00 | 948  |
| 2/22/2021 10:45:00 | 967  |
| 2/22/2021 11:15:00 | 993  |
| 2/22/2021 11:45:00 | 1000 |
| 2/22/2021 12:15:00 | 999  |
| 2/22/2021 12:45:00 | 983  |
| 2/22/2021 13:15:00 | 983  |
| 2/22/2021 13:45:00 | 988  |
| 2/22/2021 14:15:00 | 970  |
| 2/22/2021 14:45:00 | 936  |
| 2/22/2021 15:15:00 | 917  |
| 2/22/2021 15:45:00 | 913  |
| 2/22/2021 16:15:00 | 870  |
| 2/22/2021 16:45:00 | 813  |
| 2/22/2021 17:15:00 | 658  |



|                    |     |
|--------------------|-----|
| 2/22/2021 17:45:00 | 397 |
| 2/22/2021 18:15:00 | 178 |
| 2/22/2021 18:45:00 | 0   |
| 2/22/2021 19:15:00 | 0   |
| 2/22/2021 19:45:00 | 0   |
| 2/22/2021 20:15:00 | 0   |
| 2/22/2021 20:45:00 | 0   |
| 2/22/2021 21:15:00 | 0   |
| 2/22/2021 21:45:00 | 0   |
| 2/22/2021 22:15:00 | 0   |
| 2/22/2021 22:45:00 | 0   |
| 2/22/2021 23:15:00 | 0   |
| 2/22/2021 23:45:00 | 0   |
| 2/23/2021 0:15:00  | 0   |
| 2/23/2021 0:45:00  | 0   |
| 2/23/2021 1:15:00  | 0   |
| 2/23/2021 1:45:00  | 0   |
| 2/23/2021 2:15:00  | 0   |
| 2/23/2021 2:45:00  | 0   |
| 2/23/2021 3:15:00  | 0   |
| 2/23/2021 3:45:00  | 0   |
| 2/23/2021 4:15:00  | 0   |
| 2/23/2021 4:45:00  | 0   |
| 2/23/2021 5:15:00  | 0   |
| 2/23/2021 5:45:00  | 0   |
| 2/23/2021 6:15:00  | 0   |
| 2/23/2021 6:45:00  | 0   |
| 2/23/2021 7:15:00  | 33  |
| 2/23/2021 7:45:00  | 367 |
| 2/23/2021 8:15:00  | 677 |
| 2/23/2021 8:45:00  | 815 |

|                    |      |
|--------------------|------|
| 2/23/2021 9:15:00  | 861  |
| 2/23/2021 9:45:00  | 902  |
| 2/23/2021 10:15:00 | 950  |
| 2/23/2021 10:45:00 | 917  |
| 2/23/2021 11:15:00 | 995  |
| 2/23/2021 11:45:00 | 1005 |
| 2/23/2021 12:15:00 | 1011 |
| 2/23/2021 12:45:00 | 1004 |
| 2/23/2021 13:15:00 | 998  |
| 2/23/2021 13:45:00 | 990  |
| 2/23/2021 14:15:00 | 972  |
| 2/23/2021 14:45:00 | 946  |
| 2/23/2021 15:15:00 | 865  |
| 2/23/2021 15:45:00 | 873  |
| 2/23/2021 16:15:00 | 768  |
| 2/23/2021 16:45:00 | 731  |
| 2/23/2021 17:15:00 | 624  |
| 2/23/2021 17:45:00 | 461  |
| 2/23/2021 18:15:00 | 259  |
| 2/23/2021 18:45:00 | 0    |
| 2/23/2021 19:15:00 | 0    |
| 2/23/2021 19:45:00 | 0    |
| 2/23/2021 20:15:00 | 0    |
| 2/23/2021 20:45:00 | 0    |
| 2/23/2021 21:15:00 | 0    |
| 2/23/2021 21:45:00 | 0    |
| 2/23/2021 22:15:00 | 0    |
| 2/23/2021 22:45:00 | 0    |
| 2/23/2021 23:15:00 | 0    |
| 2/23/2021 23:45:00 | 0    |
| 2/24/2021 0:15:00  | 0    |

|                    |      |
|--------------------|------|
| 2/24/2021 0:45:00  | 0    |
| 2/24/2021 1:15:00  | 0    |
| 2/24/2021 1:45:00  | 0    |
| 2/24/2021 2:15:00  | 0    |
| 2/24/2021 2:45:00  | 0    |
| 2/24/2021 3:15:00  | 0    |
| 2/24/2021 3:45:00  | 0    |
| 2/24/2021 4:15:00  | 0    |
| 2/24/2021 4:45:00  | 0    |
| 2/24/2021 5:15:00  | 0    |
| 2/24/2021 5:45:00  | 0    |
| 2/24/2021 6:15:00  | 0    |
| 2/24/2021 6:45:00  | 0    |
| 2/24/2021 7:15:00  | 89   |
| 2/24/2021 7:45:00  | 396  |
| 2/24/2021 8:15:00  | 677  |
| 2/24/2021 8:45:00  | 818  |
| 2/24/2021 9:15:00  | 883  |
| 2/24/2021 9:45:00  | 912  |
| 2/24/2021 10:15:00 | 935  |
| 2/24/2021 10:45:00 | 955  |
| 2/24/2021 11:15:00 | 983  |
| 2/24/2021 11:45:00 | 997  |
| 2/24/2021 12:15:00 | 1008 |
| 2/24/2021 12:45:00 | 993  |
| 2/24/2021 13:15:00 | 821  |
| 2/24/2021 13:45:00 | 112  |
| 2/24/2021 14:15:00 | 595  |
| 2/24/2021 14:45:00 | 823  |
| 2/24/2021 15:15:00 | 326  |
| 2/24/2021 15:45:00 | 790  |

|                    |     |
|--------------------|-----|
| 2/24/2021 16:15:00 | 737 |
| 2/24/2021 16:45:00 | 234 |
| 2/24/2021 17:15:00 | 447 |
| 2/24/2021 17:45:00 | 83  |
| 2/24/2021 18:15:00 | 145 |
| 2/24/2021 18:45:00 | 0   |
| 2/24/2021 19:15:00 | 0   |
| 2/24/2021 19:45:00 | 0   |
| 2/24/2021 20:15:00 | 0   |
| 2/24/2021 20:45:00 | 0   |
| 2/24/2021 21:15:00 | 0   |
| 2/24/2021 21:45:00 | 0   |
| 2/24/2021 22:15:00 | 0   |
| 2/24/2021 22:45:00 | 0   |
| 2/24/2021 23:15:00 | 0   |
| 2/24/2021 23:45:00 | 0   |
| 2/25/2021 0:15:00  | 0   |
| 2/25/2021 0:45:00  | 0   |
| 2/25/2021 1:15:00  | 0   |
| 2/25/2021 1:45:00  | 0   |
| 2/25/2021 2:15:00  | 0   |
| 2/25/2021 2:45:00  | 0   |
| 2/25/2021 3:15:00  | 0   |
| 2/25/2021 3:45:00  | 0   |
| 2/25/2021 4:15:00  | 0   |
| 2/25/2021 4:45:00  | 0   |
| 2/25/2021 5:15:00  | 0   |
| 2/25/2021 5:45:00  | 0   |
| 2/25/2021 6:15:00  | 0   |
| 2/25/2021 6:45:00  | 0   |
| 2/25/2021 7:15:00  | 93  |

|                    |      |
|--------------------|------|
| 2/25/2021 7:45:00  | 273  |
| 2/25/2021 8:15:00  | 265  |
| 2/25/2021 8:45:00  | 584  |
| 2/25/2021 9:15:00  | 811  |
| 2/25/2021 9:45:00  | 864  |
| 2/25/2021 10:15:00 | 909  |
| 2/25/2021 10:45:00 | 914  |
| 2/25/2021 11:15:00 | 992  |
| 2/25/2021 11:45:00 | 1006 |
| 2/25/2021 12:15:00 | 1003 |
| 2/25/2021 12:45:00 | 995  |
| 2/25/2021 13:15:00 | 988  |
| 2/25/2021 13:45:00 | 979  |
| 2/25/2021 14:15:00 | 975  |
| 2/25/2021 14:45:00 | 941  |
| 2/25/2021 15:15:00 | 903  |
| 2/25/2021 15:45:00 | 783  |
| 2/25/2021 16:15:00 | 293  |
| 2/25/2021 16:45:00 | 652  |
| 2/25/2021 17:15:00 | 599  |
| 2/25/2021 17:45:00 | 441  |
| 2/25/2021 18:15:00 | 175  |
| 2/25/2021 18:45:00 | 0    |
| 2/25/2021 19:15:00 | 0    |
| 2/25/2021 19:45:00 | 0    |
| 2/25/2021 20:15:00 | 0    |
| 2/25/2021 20:45:00 | 0    |
| 2/25/2021 21:15:00 | 0    |
| 2/25/2021 21:45:00 | 0    |
| 2/25/2021 22:15:00 | 0    |
| 2/25/2021 22:45:00 | 0    |

|                    |      |
|--------------------|------|
| 2/25/2021 23:15:00 | 0    |
| 2/25/2021 23:45:00 | 0    |
| 2/26/2021 0:15:00  | 0    |
| 2/26/2021 0:45:00  | 0    |
| 2/26/2021 1:15:00  | 0    |
| 2/26/2021 1:45:00  | 0    |
| 2/26/2021 2:15:00  | 0    |
| 2/26/2021 2:45:00  | 0    |
| 2/26/2021 3:15:00  | 0    |
| 2/26/2021 3:45:00  | 0    |
| 2/26/2021 4:15:00  | 0    |
| 2/26/2021 4:45:00  | 0    |
| 2/26/2021 5:15:00  | 0    |
| 2/26/2021 5:45:00  | 0    |
| 2/26/2021 6:15:00  | 0    |
| 2/26/2021 6:45:00  | 0    |
| 2/26/2021 7:15:00  | 120  |
| 2/26/2021 7:45:00  | 388  |
| 2/26/2021 8:15:00  | 684  |
| 2/26/2021 8:45:00  | 817  |
| 2/26/2021 9:15:00  | 861  |
| 2/26/2021 9:45:00  | 909  |
| 2/26/2021 10:15:00 | 949  |
| 2/26/2021 10:45:00 | 909  |
| 2/26/2021 11:15:00 | 993  |
| 2/26/2021 11:45:00 | 999  |
| 2/26/2021 12:15:00 | 1011 |
| 2/26/2021 12:45:00 | 989  |
| 2/26/2021 13:15:00 | 973  |
| 2/26/2021 13:45:00 | 846  |
| 2/26/2021 14:15:00 | 327  |

|                    |     |
|--------------------|-----|
| 2/26/2021 14:45:00 | 282 |
| 2/26/2021 15:15:00 | 130 |
| 2/26/2021 15:45:00 | 63  |
| 2/26/2021 16:15:00 | 0   |
| 2/26/2021 16:45:00 | 379 |
| 2/26/2021 17:15:00 | 344 |
| 2/26/2021 17:45:00 | 0   |
| 2/26/2021 18:15:00 | 177 |
| 2/26/2021 18:45:00 | 0   |
| 2/26/2021 19:15:00 | 0   |
| 2/26/2021 19:45:00 | 0   |
| 2/26/2021 20:15:00 | 0   |
| 2/26/2021 20:45:00 | 0   |
| 2/26/2021 21:15:00 | 0   |
| 2/26/2021 21:45:00 | 0   |
| 2/26/2021 22:15:00 | 0   |
| 2/26/2021 22:45:00 | 0   |
| 2/26/2021 23:15:00 | 0   |
| 2/26/2021 23:45:00 | 0   |
| 2/27/2021 0:15:00  | 0   |
| 2/27/2021 0:45:00  | 0   |
| 2/27/2021 1:15:00  | 0   |
| 2/27/2021 1:45:00  | 0   |
| 2/27/2021 2:15:00  | 0   |
| 2/27/2021 2:45:00  | 0   |
| 2/27/2021 3:15:00  | 0   |
| 2/27/2021 3:45:00  | 0   |
| 2/27/2021 4:15:00  | 0   |
| 2/27/2021 4:45:00  | 0   |
| 2/27/2021 5:15:00  | 0   |
| 2/27/2021 5:45:00  | 0   |

|                    |      |
|--------------------|------|
| 2/27/2021 6:15:00  | 0    |
| 2/27/2021 6:45:00  | 0    |
| 2/27/2021 7:15:00  | 77   |
| 2/27/2021 7:45:00  | 382  |
| 2/27/2021 8:15:00  | 683  |
| 2/27/2021 8:45:00  | 805  |
| 2/27/2021 9:15:00  | 864  |
| 2/27/2021 9:45:00  | 912  |
| 2/27/2021 10:15:00 | 960  |
| 2/27/2021 10:45:00 | 963  |
| 2/27/2021 11:15:00 | 996  |
| 2/27/2021 11:45:00 | 1001 |
| 2/27/2021 12:15:00 | 1006 |
| 2/27/2021 12:45:00 | 1009 |
| 2/27/2021 13:15:00 | 1003 |
| 2/27/2021 13:45:00 | 994  |
| 2/27/2021 14:15:00 | 996  |
| 2/27/2021 14:45:00 | 928  |
| 2/27/2021 15:15:00 | 795  |
| 2/27/2021 15:45:00 | 285  |
| 2/27/2021 16:15:00 | 605  |
| 2/27/2021 16:45:00 | 154  |
| 2/27/2021 17:15:00 | 549  |
| 2/27/2021 17:45:00 | 614  |
| 2/27/2021 18:15:00 | 332  |
| 2/27/2021 18:45:00 | 0    |
| 2/27/2021 19:15:00 | 0    |
| 2/27/2021 19:45:00 | 0    |
| 2/27/2021 20:15:00 | 0    |
| 2/27/2021 20:45:00 | 0    |
| 2/27/2021 21:15:00 | 0    |



|                    |      |
|--------------------|------|
| 2/27/2021 21:45:00 | 0    |
| 2/27/2021 22:15:00 | 0    |
| 2/27/2021 22:45:00 | 0    |
| 2/27/2021 23:15:00 | 0    |
| 2/27/2021 23:45:00 | 0    |
| 2/28/2021 0:15:00  | 0    |
| 2/28/2021 0:45:00  | 0    |
| 2/28/2021 1:15:00  | 0    |
| 2/28/2021 1:45:00  | 0    |
| 2/28/2021 2:15:00  | 0    |
| 2/28/2021 2:45:00  | 0    |
| 2/28/2021 3:15:00  | 0    |
| 2/28/2021 3:45:00  | 0    |
| 2/28/2021 4:15:00  | 0    |
| 2/28/2021 4:45:00  | 0    |
| 2/28/2021 5:15:00  | 0    |
| 2/28/2021 5:45:00  | 0    |
| 2/28/2021 6:15:00  | 0    |
| 2/28/2021 6:45:00  | 0    |
| 2/28/2021 7:15:00  | 113  |
| 2/28/2021 7:45:00  | 392  |
| 2/28/2021 8:15:00  | 688  |
| 2/28/2021 8:45:00  | 821  |
| 2/28/2021 9:15:00  | 867  |
| 2/28/2021 9:45:00  | 870  |
| 2/28/2021 10:15:00 | 918  |
| 2/28/2021 10:45:00 | 920  |
| 2/28/2021 11:15:00 | 996  |
| 2/28/2021 11:45:00 | 1006 |
| 2/28/2021 12:15:00 | 1012 |
| 2/28/2021 12:45:00 | 1005 |

|                    |     |
|--------------------|-----|
| 2/28/2021 13:15:00 | 998 |
| 2/28/2021 13:45:00 | 983 |
| 2/28/2021 14:15:00 | 997 |
| 2/28/2021 14:45:00 | 967 |
| 2/28/2021 15:15:00 | 825 |
| 2/28/2021 15:45:00 | 216 |
| 2/28/2021 16:15:00 | 702 |
| 2/28/2021 16:45:00 | 799 |
| 2/28/2021 17:15:00 | 514 |
| 2/28/2021 17:45:00 | 0   |
| 2/28/2021 18:15:00 | 60  |
| 2/28/2021 18:45:00 | 0   |
| 2/28/2021 19:15:00 | 0   |
| 2/28/2021 19:45:00 | 0   |
| 2/28/2021 20:15:00 | 0   |
| 2/28/2021 20:45:00 | 0   |
| 2/28/2021 21:15:00 | 0   |
| 2/28/2021 21:45:00 | 0   |
| 2/28/2021 22:15:00 | 0   |
| 2/28/2021 22:45:00 | 0   |
| 2/28/2021 23:15:00 | 0   |
| 2/28/2021 23:45:00 | 0   |
| 3/1/2021 0:15:00   | 0   |
| 3/1/2021 0:45:00   | 0   |
| 3/1/2021 1:15:00   | 0   |
| 3/1/2021 1:45:00   | 0   |
| 3/1/2021 2:15:00   | 0   |
| 3/1/2021 2:45:00   | 0   |
| 3/1/2021 3:15:00   | 0   |
| 3/1/2021 3:45:00   | 0   |
| 3/1/2021 4:15:00   | 0   |

|                   |     |
|-------------------|-----|
| 3/1/2021 4:45:00  | 0   |
| 3/1/2021 5:15:00  | 0   |
| 3/1/2021 5:45:00  | 0   |
| 3/1/2021 6:15:00  | 0   |
| 3/1/2021 6:45:00  | 0   |
| 3/1/2021 7:15:00  | 98  |
| 3/1/2021 7:45:00  | 423 |
| 3/1/2021 8:15:00  | 667 |
| 3/1/2021 8:45:00  | 758 |
| 3/1/2021 9:15:00  | 838 |
| 3/1/2021 9:45:00  | 886 |
| 3/1/2021 10:15:00 | 919 |
| 3/1/2021 10:45:00 | 923 |
| 3/1/2021 11:15:00 | 961 |
| 3/1/2021 11:45:00 | 972 |
| 3/1/2021 12:15:00 | 978 |
| 3/1/2021 12:45:00 | 981 |
| 3/1/2021 13:15:00 | 971 |
| 3/1/2021 13:45:00 | 974 |
| 3/1/2021 14:15:00 | 948 |
| 3/1/2021 14:45:00 | 942 |
| 3/1/2021 15:15:00 | 928 |
| 3/1/2021 15:45:00 | 893 |
| 3/1/2021 16:15:00 | 855 |
| 3/1/2021 16:45:00 | 796 |
| 3/1/2021 17:15:00 | 702 |
| 3/1/2021 17:45:00 | 509 |
| 3/1/2021 18:15:00 | 191 |
| 3/1/2021 18:45:00 | 0   |
| 3/1/2021 19:15:00 | 0   |
| 3/1/2021 19:45:00 | 0   |

|                   |     |
|-------------------|-----|
| 3/1/2021 20:15:00 | 0   |
| 3/1/2021 20:45:00 | 0   |
| 3/1/2021 21:15:00 | 0   |
| 3/1/2021 21:45:00 | 0   |
| 3/1/2021 22:15:00 | 0   |
| 3/1/2021 22:45:00 | 0   |
| 3/1/2021 23:15:00 | 0   |
| 3/1/2021 23:45:00 | 0   |
| 3/2/2021 0:15:00  | 0   |
| 3/2/2021 0:45:00  | 0   |
| 3/2/2021 1:15:00  | 0   |
| 3/2/2021 1:45:00  | 0   |
| 3/2/2021 2:15:00  | 0   |
| 3/2/2021 2:45:00  | 0   |
| 3/2/2021 3:15:00  | 0   |
| 3/2/2021 3:45:00  | 0   |
| 3/2/2021 4:15:00  | 0   |
| 3/2/2021 4:45:00  | 0   |
| 3/2/2021 5:15:00  | 0   |
| 3/2/2021 5:45:00  | 0   |
| 3/2/2021 6:15:00  | 0   |
| 3/2/2021 6:45:00  | 0   |
| 3/2/2021 7:15:00  | 86  |
| 3/2/2021 7:45:00  | 364 |
| 3/2/2021 8:15:00  | 641 |
| 3/2/2021 8:45:00  | 770 |
| 3/2/2021 9:15:00  | 819 |
| 3/2/2021 9:45:00  | 887 |
| 3/2/2021 10:15:00 | 906 |
| 3/2/2021 10:45:00 | 916 |
| 3/2/2021 11:15:00 | 958 |

|                   |     |
|-------------------|-----|
| 3/2/2021 11:45:00 | 972 |
| 3/2/2021 12:15:00 | 979 |
| 3/2/2021 12:45:00 | 981 |
| 3/2/2021 13:15:00 | 980 |
| 3/2/2021 13:45:00 | 974 |
| 3/2/2021 14:15:00 | 963 |
| 3/2/2021 14:45:00 | 951 |
| 3/2/2021 15:15:00 | 923 |
| 3/2/2021 15:45:00 | 884 |
| 3/2/2021 16:15:00 | 855 |
| 3/2/2021 16:45:00 | 797 |
| 3/2/2021 17:15:00 | 713 |
| 3/2/2021 17:45:00 | 532 |
| 3/2/2021 18:15:00 | 227 |
| 3/2/2021 18:45:00 | 0   |
| 3/2/2021 19:15:00 | 0   |
| 3/2/2021 19:45:00 | 0   |
| 3/2/2021 20:15:00 | 0   |
| 3/2/2021 20:45:00 | 0   |
| 3/2/2021 21:15:00 | 0   |
| 3/2/2021 21:45:00 | 0   |
| 3/2/2021 22:15:00 | 0   |
| 3/2/2021 22:45:00 | 0   |
| 3/2/2021 23:15:00 | 0   |
| 3/2/2021 23:45:00 | 0   |
| 3/3/2021 0:15:00  | 0   |
| 3/3/2021 0:45:00  | 0   |
| 3/3/2021 1:15:00  | 0   |
| 3/3/2021 1:45:00  | 0   |
| 3/3/2021 2:15:00  | 0   |
| 3/3/2021 2:45:00  | 0   |

|                   |     |
|-------------------|-----|
| 3/3/2021 3:15:00  | 0   |
| 3/3/2021 3:45:00  | 0   |
| 3/3/2021 4:15:00  | 0   |
| 3/3/2021 4:45:00  | 0   |
| 3/3/2021 5:15:00  | 0   |
| 3/3/2021 5:45:00  | 0   |
| 3/3/2021 6:15:00  | 0   |
| 3/3/2021 6:45:00  | 0   |
| 3/3/2021 7:15:00  | 101 |
| 3/3/2021 7:45:00  | 413 |
| 3/3/2021 8:15:00  | 643 |
| 3/3/2021 8:45:00  | 765 |
| 3/3/2021 9:15:00  | 831 |
| 3/3/2021 9:45:00  | 855 |
| 3/3/2021 10:15:00 | 851 |
| 3/3/2021 10:45:00 | 842 |
| 3/3/2021 11:15:00 | 912 |
| 3/3/2021 11:45:00 | 964 |
| 3/3/2021 12:15:00 | 958 |
| 3/3/2021 12:45:00 | 981 |
| 3/3/2021 13:15:00 | 979 |
| 3/3/2021 13:45:00 | 965 |
| 3/3/2021 14:15:00 | 965 |
| 3/3/2021 14:45:00 | 951 |
| 3/3/2021 15:15:00 | 929 |
| 3/3/2021 15:45:00 | 898 |
| 3/3/2021 16:15:00 | 856 |
| 3/3/2021 16:45:00 | 798 |
| 3/3/2021 17:15:00 | 715 |
| 3/3/2021 17:45:00 | 531 |
| 3/3/2021 18:15:00 | 220 |

|                   |     |
|-------------------|-----|
| 3/3/2021 18:45:00 | 0   |
| 3/3/2021 19:15:00 | 0   |
| 3/3/2021 19:45:00 | 0   |
| 3/3/2021 20:15:00 | 0   |
| 3/3/2021 20:45:00 | 0   |
| 3/3/2021 21:15:00 | 0   |
| 3/3/2021 21:45:00 | 0   |
| 3/3/2021 22:15:00 | 0   |
| 3/3/2021 22:45:00 | 0   |
| 3/3/2021 23:15:00 | 0   |
| 3/3/2021 23:45:00 | 0   |
| 3/4/2021 0:15:00  | 0   |
| 3/4/2021 0:45:00  | 0   |
| 3/4/2021 1:15:00  | 0   |
| 3/4/2021 1:45:00  | 0   |
| 3/4/2021 2:15:00  | 0   |
| 3/4/2021 2:45:00  | 0   |
| 3/4/2021 3:15:00  | 0   |
| 3/4/2021 3:45:00  | 0   |
| 3/4/2021 4:15:00  | 0   |
| 3/4/2021 4:45:00  | 0   |
| 3/4/2021 5:15:00  | 0   |
| 3/4/2021 5:45:00  | 0   |
| 3/4/2021 6:15:00  | 0   |
| 3/4/2021 6:45:00  | 0   |
| 3/4/2021 7:15:00  | 136 |
| 3/4/2021 7:45:00  | 366 |
| 3/4/2021 8:15:00  | 641 |
| 3/4/2021 8:45:00  | 769 |
| 3/4/2021 9:15:00  | 820 |
| 3/4/2021 9:45:00  | 855 |

|                   |     |
|-------------------|-----|
| 3/4/2021 10:15:00 | 902 |
| 3/4/2021 10:45:00 | 910 |
| 3/4/2021 11:15:00 | 943 |
| 3/4/2021 11:45:00 | 965 |
| 3/4/2021 12:15:00 | 967 |
| 3/4/2021 12:45:00 | 977 |
| 3/4/2021 13:15:00 | 961 |
| 3/4/2021 13:45:00 | 966 |
| 3/4/2021 14:15:00 | 935 |
| 3/4/2021 14:45:00 | 909 |
| 3/4/2021 15:15:00 | 899 |
| 3/4/2021 15:45:00 | 887 |
| 3/4/2021 16:15:00 | 857 |
| 3/4/2021 16:45:00 | 798 |
| 3/4/2021 17:15:00 | 669 |
| 3/4/2021 17:45:00 | 456 |
| 3/4/2021 18:15:00 | 245 |
| 3/4/2021 18:45:00 | 0   |
| 3/4/2021 19:15:00 | 0   |
| 3/4/2021 19:45:00 | 0   |
| 3/4/2021 20:15:00 | 0   |
| 3/4/2021 20:45:00 | 0   |
| 3/4/2021 21:15:00 | 0   |
| 3/4/2021 21:45:00 | 0   |
| 3/4/2021 22:15:00 | 0   |
| 3/4/2021 22:45:00 | 0   |
| 3/4/2021 23:15:00 | 0   |
| 3/4/2021 23:45:00 | 0   |
| 3/5/2021 0:15:00  | 0   |
| 3/5/2021 0:45:00  | 0   |
| 3/5/2021 1:15:00  | 0   |



|                   |     |
|-------------------|-----|
| 3/5/2021 1:45:00  | 0   |
| 3/5/2021 2:15:00  | 0   |
| 3/5/2021 2:45:00  | 0   |
| 3/5/2021 3:15:00  | 0   |
| 3/5/2021 3:45:00  | 0   |
| 3/5/2021 4:15:00  | 0   |
| 3/5/2021 4:45:00  | 0   |
| 3/5/2021 5:15:00  | 0   |
| 3/5/2021 5:45:00  | 0   |
| 3/5/2021 6:15:00  | 0   |
| 3/5/2021 6:45:00  | 0   |
| 3/5/2021 7:15:00  | 132 |
| 3/5/2021 7:45:00  | 417 |
| 3/5/2021 8:15:00  | 635 |
| 3/5/2021 8:45:00  | 763 |
| 3/5/2021 9:15:00  | 832 |
| 3/5/2021 9:45:00  | 890 |
| 3/5/2021 10:15:00 | 913 |
| 3/5/2021 10:45:00 | 913 |
| 3/5/2021 11:15:00 | 946 |
| 3/5/2021 11:45:00 | 960 |
| 3/5/2021 12:15:00 | 975 |
| 3/5/2021 12:45:00 | 972 |
| 3/5/2021 13:15:00 | 954 |
| 3/5/2021 13:45:00 | 894 |
| 3/5/2021 14:15:00 | 617 |
| 3/5/2021 14:45:00 | 34  |
| 3/5/2021 15:15:00 | 285 |
| 3/5/2021 15:45:00 | 479 |
| 3/5/2021 16:15:00 | 0   |
| 3/5/2021 16:45:00 | 0   |

|                   |     |
|-------------------|-----|
| 3/5/2021 17:15:00 | 458 |
| 3/5/2021 17:45:00 | 116 |
| 3/5/2021 18:15:00 | 166 |
| 3/5/2021 18:45:00 | 0   |
| 3/5/2021 19:15:00 | 0   |
| 3/5/2021 19:45:00 | 0   |
| 3/5/2021 20:15:00 | 0   |
| 3/5/2021 20:45:00 | 0   |
| 3/5/2021 21:15:00 | 0   |
| 3/5/2021 21:45:00 | 0   |
| 3/5/2021 22:15:00 | 0   |
| 3/5/2021 22:45:00 | 0   |
| 3/5/2021 23:15:00 | 0   |
| 3/5/2021 23:45:00 | 0   |
| 3/6/2021 0:15:00  | 0   |
| 3/6/2021 0:45:00  | 0   |
| 3/6/2021 1:15:00  | 0   |
| 3/6/2021 1:45:00  | 0   |
| 3/6/2021 2:15:00  | 0   |
| 3/6/2021 2:45:00  | 0   |
| 3/6/2021 3:15:00  | 0   |
| 3/6/2021 3:45:00  | 0   |
| 3/6/2021 4:15:00  | 0   |
| 3/6/2021 4:45:00  | 0   |
| 3/6/2021 5:15:00  | 0   |
| 3/6/2021 5:45:00  | 0   |
| 3/6/2021 6:15:00  | 0   |
| 3/6/2021 6:45:00  | 0   |
| 3/6/2021 7:15:00  | 0   |
| 3/6/2021 7:45:00  | 5   |
| 3/6/2021 8:15:00  | 0   |

|                   |     |
|-------------------|-----|
| 3/6/2021 8:45:00  | 584 |
| 3/6/2021 9:15:00  | 826 |
| 3/6/2021 9:45:00  | 857 |
| 3/6/2021 10:15:00 | 859 |
| 3/6/2021 10:45:00 | 812 |
| 3/6/2021 11:15:00 | 314 |
| 3/6/2021 11:45:00 | 848 |
| 3/6/2021 12:15:00 | 945 |
| 3/6/2021 12:45:00 | 864 |
| 3/6/2021 13:15:00 | 594 |
| 3/6/2021 13:45:00 | 733 |
| 3/6/2021 14:15:00 | 90  |
| 3/6/2021 14:45:00 | 174 |
| 3/6/2021 15:15:00 | 10  |
| 3/6/2021 15:45:00 | 75  |
| 3/6/2021 16:15:00 | 628 |
| 3/6/2021 16:45:00 | 570 |
| 3/6/2021 17:15:00 | 149 |
| 3/6/2021 17:45:00 | 0   |
| 3/6/2021 18:15:00 | 0   |
| 3/6/2021 18:45:00 | 0   |
| 3/6/2021 19:15:00 | 0   |
| 3/6/2021 19:45:00 | 0   |
| 3/6/2021 20:15:00 | 0   |
| 3/6/2021 20:45:00 | 0   |
| 3/6/2021 21:15:00 | 0   |
| 3/6/2021 21:45:00 | 0   |
| 3/6/2021 22:15:00 | 0   |
| 3/6/2021 22:45:00 | 0   |
| 3/6/2021 23:15:00 | 0   |
| 3/6/2021 23:45:00 | 0   |

|                   |     |
|-------------------|-----|
| 3/7/2021 0:15:00  | 0   |
| 3/7/2021 0:45:00  | 0   |
| 3/7/2021 1:15:00  | 0   |
| 3/7/2021 1:45:00  | 0   |
| 3/7/2021 2:15:00  | 0   |
| 3/7/2021 2:45:00  | 0   |
| 3/7/2021 3:15:00  | 0   |
| 3/7/2021 3:45:00  | 0   |
| 3/7/2021 4:15:00  | 0   |
| 3/7/2021 4:45:00  | 0   |
| 3/7/2021 5:15:00  | 0   |
| 3/7/2021 5:45:00  | 0   |
| 3/7/2021 6:15:00  | 0   |
| 3/7/2021 6:45:00  | 0   |
| 3/7/2021 7:15:00  | 184 |
| 3/7/2021 7:45:00  | 457 |
| 3/7/2021 8:15:00  | 692 |
| 3/7/2021 8:45:00  | 790 |
| 3/7/2021 9:15:00  | 845 |
| 3/7/2021 9:45:00  | 891 |
| 3/7/2021 10:15:00 | 918 |
| 3/7/2021 10:45:00 | 929 |
| 3/7/2021 11:15:00 | 941 |
| 3/7/2021 11:45:00 | 956 |
| 3/7/2021 12:15:00 | 964 |
| 3/7/2021 12:45:00 | 855 |
| 3/7/2021 13:15:00 | 484 |
| 3/7/2021 13:45:00 | 836 |
| 3/7/2021 14:15:00 | 926 |
| 3/7/2021 14:45:00 | 908 |
| 3/7/2021 15:15:00 | 892 |

|                   |     |
|-------------------|-----|
| 3/7/2021 15:45:00 | 713 |
| 3/7/2021 16:15:00 | 0   |
| 3/7/2021 16:45:00 | 555 |
| 3/7/2021 17:15:00 | 284 |
| 3/7/2021 17:45:00 | 375 |
| 3/7/2021 18:15:00 | 24  |
| 3/7/2021 18:45:00 | 0   |
| 3/7/2021 19:15:00 | 0   |
| 3/7/2021 19:45:00 | 0   |
| 3/7/2021 20:15:00 | 0   |
| 3/7/2021 20:45:00 | 0   |
| 3/7/2021 21:15:00 | 0   |
| 3/7/2021 21:45:00 | 0   |
| 3/7/2021 22:15:00 | 0   |
| 3/7/2021 22:45:00 | 0   |
| 3/7/2021 23:15:00 | 0   |
| 3/7/2021 23:45:00 | 0   |
| 3/8/2021 0:15:00  | 0   |
| 3/8/2021 0:45:00  | 0   |
| 3/8/2021 1:15:00  | 0   |
| 3/8/2021 1:45:00  | 0   |
| 3/8/2021 2:15:00  | 0   |
| 3/8/2021 2:45:00  | 0   |
| 3/8/2021 3:15:00  | 0   |
| 3/8/2021 3:45:00  | 0   |
| 3/8/2021 4:15:00  | 0   |
| 3/8/2021 4:45:00  | 0   |
| 3/8/2021 5:15:00  | 0   |
| 3/8/2021 5:45:00  | 0   |
| 3/8/2021 6:15:00  | 0   |
| 3/8/2021 6:45:00  | 0   |

|                   |     |
|-------------------|-----|
| 3/8/2021 7:15:00  | 134 |
| 3/8/2021 7:45:00  | 484 |
| 3/8/2021 8:15:00  | 694 |
| 3/8/2021 8:45:00  | 785 |
| 3/8/2021 9:15:00  | 850 |
| 3/8/2021 9:45:00  | 883 |
| 3/8/2021 10:15:00 | 920 |
| 3/8/2021 10:45:00 | 942 |
| 3/8/2021 11:15:00 | 952 |
| 3/8/2021 11:45:00 | 965 |
| 3/8/2021 12:15:00 | 980 |
| 3/8/2021 12:45:00 | 982 |
| 3/8/2021 13:15:00 | 979 |
| 3/8/2021 13:45:00 | 930 |
| 3/8/2021 14:15:00 | 716 |
| 3/8/2021 14:45:00 | 235 |
| 3/8/2021 15:15:00 | 752 |
| 3/8/2021 15:45:00 | 900 |
| 3/8/2021 16:15:00 | 855 |
| 3/8/2021 16:45:00 | 801 |
| 3/8/2021 17:15:00 | 700 |
| 3/8/2021 17:45:00 | 484 |
| 3/8/2021 18:15:00 | 243 |
| 3/8/2021 18:45:00 | 0   |
| 3/8/2021 19:15:00 | 0   |
| 3/8/2021 19:45:00 | 0   |
| 3/8/2021 20:15:00 | 0   |
| 3/8/2021 20:45:00 | 0   |
| 3/8/2021 21:15:00 | 0   |
| 3/8/2021 21:45:00 | 0   |
| 3/8/2021 22:15:00 | 0   |

|                   |     |
|-------------------|-----|
| 3/8/2021 22:45:00 | 0   |
| 3/8/2021 23:15:00 | 0   |
| 3/8/2021 23:45:00 | 0   |
| 3/9/2021 0:15:00  | 0   |
| 3/9/2021 0:45:00  | 0   |
| 3/9/2021 1:15:00  | 0   |
| 3/9/2021 1:45:00  | 0   |
| 3/9/2021 2:15:00  | 0   |
| 3/9/2021 2:45:00  | 0   |
| 3/9/2021 3:15:00  | 0   |
| 3/9/2021 3:45:00  | 0   |
| 3/9/2021 4:15:00  | 0   |
| 3/9/2021 4:45:00  | 0   |
| 3/9/2021 5:15:00  | 0   |
| 3/9/2021 5:45:00  | 0   |
| 3/9/2021 6:15:00  | 0   |
| 3/9/2021 6:45:00  | 0   |
| 3/9/2021 7:15:00  | 199 |
| 3/9/2021 7:45:00  | 495 |
| 3/9/2021 8:15:00  | 694 |
| 3/9/2021 8:45:00  | 791 |
| 3/9/2021 9:15:00  | 851 |
| 3/9/2021 9:45:00  | 894 |
| 3/9/2021 10:15:00 | 923 |
| 3/9/2021 10:45:00 | 944 |
| 3/9/2021 11:15:00 | 964 |
| 3/9/2021 11:45:00 | 974 |
| 3/9/2021 12:15:00 | 980 |
| 3/9/2021 12:45:00 | 982 |
| 3/9/2021 13:15:00 | 981 |
| 3/9/2021 13:45:00 | 975 |

|                   |     |
|-------------------|-----|
| 3/9/2021 14:15:00 | 966 |
| 3/9/2021 14:45:00 | 952 |
| 3/9/2021 15:15:00 | 917 |
| 3/9/2021 15:45:00 | 863 |
| 3/9/2021 16:15:00 | 796 |
| 3/9/2021 16:45:00 | 499 |
| 3/9/2021 17:15:00 | 0   |
| 3/9/2021 17:45:00 | 368 |
| 3/9/2021 18:15:00 | 114 |
| 3/9/2021 18:45:00 | 0   |
| 3/9/2021 19:15:00 | 0   |
| 3/9/2021 19:45:00 | 0   |
| 3/9/2021 20:15:00 | 0   |
| 3/9/2021 20:45:00 | 0   |
| 3/9/2021 21:15:00 | 0   |
| 3/9/2021 21:45:00 | 0   |
| 3/9/2021 22:15:00 | 0   |
| 3/9/2021 22:45:00 | 0   |
| 3/9/2021 23:15:00 | 0   |
| 3/9/2021 23:45:00 | 0   |
| 3/10/2021 0:15:00 | 0   |
| 3/10/2021 0:45:00 | 0   |
| 3/10/2021 1:15:00 | 0   |
| 3/10/2021 1:45:00 | 0   |
| 3/10/2021 2:15:00 | 0   |
| 3/10/2021 2:45:00 | 0   |
| 3/10/2021 3:15:00 | 0   |
| 3/10/2021 3:45:00 | 0   |
| 3/10/2021 4:15:00 | 0   |
| 3/10/2021 4:45:00 | 0   |
| 3/10/2021 5:15:00 | 0   |



|                    |     |
|--------------------|-----|
| 3/10/2021 5:45:00  | 0   |
| 3/10/2021 6:15:00  | 0   |
| 3/10/2021 6:45:00  | 0   |
| 3/10/2021 7:15:00  | 134 |
| 3/10/2021 7:45:00  | 354 |
| 3/10/2021 8:15:00  | 659 |
| 3/10/2021 8:45:00  | 791 |
| 3/10/2021 9:15:00  | 852 |
| 3/10/2021 9:45:00  | 886 |
| 3/10/2021 10:15:00 | 899 |
| 3/10/2021 10:45:00 | 875 |
| 3/10/2021 11:15:00 | 964 |
| 3/10/2021 11:45:00 | 974 |
| 3/10/2021 12:15:00 | 980 |
| 3/10/2021 12:45:00 | 982 |
| 3/10/2021 13:15:00 | 981 |
| 3/10/2021 13:45:00 | 975 |
| 3/10/2021 14:15:00 | 956 |
| 3/10/2021 14:45:00 | 952 |
| 3/10/2021 15:15:00 | 891 |
| 3/10/2021 15:45:00 | 741 |
| 3/10/2021 16:15:00 | 821 |
| 3/10/2021 16:45:00 | 643 |
| 3/10/2021 17:15:00 | 373 |
| 3/10/2021 17:45:00 | 401 |
| 3/10/2021 18:15:00 | 220 |
| 3/10/2021 18:45:00 | 0   |
| 3/10/2021 19:15:00 | 0   |
| 3/10/2021 19:45:00 | 0   |
| 3/10/2021 20:15:00 | 0   |
| 3/10/2021 20:45:00 | 0   |

|                    |     |
|--------------------|-----|
| 3/10/2021 21:15:00 | 0   |
| 3/10/2021 21:45:00 | 0   |
| 3/10/2021 22:15:00 | 0   |
| 3/10/2021 22:45:00 | 0   |
| 3/10/2021 23:15:00 | 0   |
| 3/10/2021 23:45:00 | 0   |
| 3/11/2021 0:15:00  | 0   |
| 3/11/2021 0:45:00  | 0   |
| 3/11/2021 1:15:00  | 0   |
| 3/11/2021 1:45:00  | 0   |
| 3/11/2021 2:15:00  | 0   |
| 3/11/2021 2:45:00  | 0   |
| 3/11/2021 3:15:00  | 0   |
| 3/11/2021 3:45:00  | 0   |
| 3/11/2021 4:15:00  | 0   |
| 3/11/2021 4:45:00  | 0   |
| 3/11/2021 5:15:00  | 0   |
| 3/11/2021 5:45:00  | 0   |
| 3/11/2021 6:15:00  | 0   |
| 3/11/2021 6:45:00  | 0   |
| 3/11/2021 7:15:00  | 214 |
| 3/11/2021 7:45:00  | 518 |
| 3/11/2021 8:15:00  | 702 |
| 3/11/2021 8:45:00  | 794 |
| 3/11/2021 9:15:00  | 854 |
| 3/11/2021 9:45:00  | 896 |
| 3/11/2021 10:15:00 | 888 |
| 3/11/2021 10:45:00 | 803 |
| 3/11/2021 11:15:00 | 925 |
| 3/11/2021 11:45:00 | 974 |
| 3/11/2021 12:15:00 | 980 |

|                    |     |
|--------------------|-----|
| 3/11/2021 12:45:00 | 982 |
| 3/11/2021 13:15:00 | 981 |
| 3/11/2021 13:45:00 | 975 |
| 3/11/2021 14:15:00 | 966 |
| 3/11/2021 14:45:00 | 952 |
| 3/11/2021 15:15:00 | 931 |
| 3/11/2021 15:45:00 | 901 |
| 3/11/2021 16:15:00 | 860 |
| 3/11/2021 16:45:00 | 803 |
| 3/11/2021 17:15:00 | 714 |
| 3/11/2021 17:45:00 | 565 |
| 3/11/2021 18:15:00 | 305 |
| 3/11/2021 18:45:00 | 0   |
| 3/11/2021 19:15:00 | 0   |
| 3/11/2021 19:45:00 | 0   |
| 3/11/2021 20:15:00 | 0   |
| 3/11/2021 20:45:00 | 0   |
| 3/11/2021 21:15:00 | 0   |
| 3/11/2021 21:45:00 | 0   |
| 3/11/2021 22:15:00 | 0   |
| 3/11/2021 22:45:00 | 0   |
| 3/11/2021 23:15:00 | 0   |
| 3/11/2021 23:45:00 | 0   |
| 3/12/2021 0:15:00  | 0   |
| 3/12/2021 0:45:00  | 0   |
| 3/12/2021 1:15:00  | 0   |
| 3/12/2021 1:45:00  | 0   |
| 3/12/2021 2:15:00  | 0   |
| 3/12/2021 2:45:00  | 0   |
| 3/12/2021 3:15:00  | 0   |
| 3/12/2021 3:45:00  | 0   |

|                    |     |
|--------------------|-----|
| 3/12/2021 4:15:00  | 0   |
| 3/12/2021 4:45:00  | 0   |
| 3/12/2021 5:15:00  | 0   |
| 3/12/2021 5:45:00  | 0   |
| 3/12/2021 6:15:00  | 0   |
| 3/12/2021 6:45:00  | 0   |
| 3/12/2021 7:15:00  | 215 |
| 3/12/2021 7:45:00  | 460 |
| 3/12/2021 8:15:00  | 656 |
| 3/12/2021 8:45:00  | 796 |
| 3/12/2021 9:15:00  | 854 |
| 3/12/2021 9:45:00  | 897 |
| 3/12/2021 10:15:00 | 889 |
| 3/12/2021 10:45:00 | 790 |
| 3/12/2021 11:15:00 | 908 |
| 3/12/2021 11:45:00 | 975 |
| 3/12/2021 12:15:00 | 980 |
| 3/12/2021 12:45:00 | 982 |
| 3/12/2021 13:15:00 | 973 |
| 3/12/2021 13:45:00 | 975 |
| 3/12/2021 14:15:00 | 966 |
| 3/12/2021 14:45:00 | 952 |
| 3/12/2021 15:15:00 | 931 |
| 3/12/2021 15:45:00 | 901 |
| 3/12/2021 16:15:00 | 860 |
| 3/12/2021 16:45:00 | 803 |
| 3/12/2021 17:15:00 | 714 |
| 3/12/2021 17:45:00 | 567 |
| 3/12/2021 18:15:00 | 280 |
| 3/12/2021 18:45:00 | 0   |
| 3/12/2021 19:15:00 | 0   |

|                    |     |
|--------------------|-----|
| 3/12/2021 19:45:00 | 0   |
| 3/12/2021 20:15:00 | 0   |
| 3/12/2021 20:45:00 | 0   |
| 3/12/2021 21:15:00 | 0   |
| 3/12/2021 21:45:00 | 0   |
| 3/12/2021 22:15:00 | 0   |
| 3/12/2021 22:45:00 | 0   |
| 3/12/2021 23:15:00 | 0   |
| 3/12/2021 23:45:00 | 0   |
| 3/13/2021 0:15:00  | 0   |
| 3/13/2021 0:45:00  | 0   |
| 3/13/2021 1:15:00  | 0   |
| 3/13/2021 1:45:00  | 0   |
| 3/13/2021 2:15:00  | 0   |
| 3/13/2021 2:45:00  | 0   |
| 3/13/2021 3:15:00  | 0   |
| 3/13/2021 3:45:00  | 0   |
| 3/13/2021 4:15:00  | 0   |
| 3/13/2021 4:45:00  | 0   |
| 3/13/2021 5:15:00  | 0   |
| 3/13/2021 5:45:00  | 0   |
| 3/13/2021 6:15:00  | 0   |
| 3/13/2021 6:45:00  | 0   |
| 3/13/2021 7:15:00  | 173 |
| 3/13/2021 7:45:00  | 453 |
| 3/13/2021 8:15:00  | 664 |
| 3/13/2021 8:45:00  | 763 |
| 3/13/2021 9:15:00  | 844 |
| 3/13/2021 9:45:00  | 898 |
| 3/13/2021 10:15:00 | 887 |
| 3/13/2021 10:45:00 | 733 |

|                    |     |
|--------------------|-----|
| 3/13/2021 11:15:00 | 909 |
| 3/13/2021 11:45:00 | 949 |
| 3/13/2021 12:15:00 | 978 |
| 3/13/2021 12:45:00 | 974 |
| 3/13/2021 13:15:00 | 943 |
| 3/13/2021 13:45:00 | 877 |
| 3/13/2021 14:15:00 | 945 |
| 3/13/2021 14:45:00 | 946 |
| 3/13/2021 15:15:00 | 914 |
| 3/13/2021 15:45:00 | 866 |
| 3/13/2021 16:15:00 | 826 |
| 3/13/2021 16:45:00 | 728 |
| 3/13/2021 17:15:00 | 407 |
| 3/13/2021 17:45:00 | 0   |
| 3/13/2021 18:15:00 | 47  |
| 3/13/2021 18:45:00 | 0   |
| 3/13/2021 19:15:00 | 0   |
| 3/13/2021 19:45:00 | 0   |
| 3/13/2021 20:15:00 | 0   |
| 3/13/2021 20:45:00 | 0   |
| 3/13/2021 21:15:00 | 0   |
| 3/13/2021 21:45:00 | 0   |
| 3/13/2021 22:15:00 | 0   |
| 3/13/2021 22:45:00 | 0   |
| 3/13/2021 23:15:00 | 0   |
| 3/13/2021 23:45:00 | 0   |
| 3/14/2021 0:15:00  | 0   |
| 3/14/2021 0:45:00  | 0   |
| 3/14/2021 1:15:00  | 0   |
| 3/14/2021 1:45:00  | 0   |
| 3/14/2021 2:15:00  | 0   |

|                    |     |
|--------------------|-----|
| 3/14/2021 2:45:00  | 0   |
| 3/14/2021 3:15:00  | 0   |
| 3/14/2021 3:45:00  | 0   |
| 3/14/2021 4:15:00  | 0   |
| 3/14/2021 4:45:00  | 0   |
| 3/14/2021 5:15:00  | 0   |
| 3/14/2021 5:45:00  | 0   |
| 3/14/2021 6:15:00  | 0   |
| 3/14/2021 6:45:00  | 0   |
| 3/14/2021 7:15:00  | 173 |
| 3/14/2021 7:45:00  | 481 |
| 3/14/2021 8:15:00  | 692 |
| 3/14/2021 8:45:00  | 774 |
| 3/14/2021 9:15:00  | 829 |
| 3/14/2021 9:45:00  | 887 |
| 3/14/2021 10:15:00 | 891 |
| 3/14/2021 10:45:00 | 779 |
| 3/14/2021 11:15:00 | 911 |
| 3/14/2021 11:45:00 | 959 |
| 3/14/2021 12:15:00 | 957 |
| 3/14/2021 12:45:00 | 865 |
| 3/14/2021 13:15:00 | 499 |
| 3/14/2021 13:45:00 | 741 |
| 3/14/2021 14:15:00 | 46  |
| 3/14/2021 14:45:00 | 83  |
| 3/14/2021 15:15:00 | 2   |
| 3/14/2021 15:45:00 | 0   |
| 3/14/2021 16:15:00 | 0   |
| 3/14/2021 16:45:00 | 32  |
| 3/14/2021 17:15:00 | 0   |
| 3/14/2021 17:45:00 | 2   |

|                    |     |
|--------------------|-----|
| 3/14/2021 18:15:00 | 0   |
| 3/14/2021 18:45:00 | 0   |
| 3/14/2021 19:15:00 | 0   |
| 3/14/2021 19:45:00 | 0   |
| 3/14/2021 20:15:00 | 0   |
| 3/14/2021 20:45:00 | 0   |
| 3/14/2021 21:15:00 | 0   |
| 3/14/2021 21:45:00 | 0   |
| 3/14/2021 22:15:00 | 0   |
| 3/14/2021 22:45:00 | 0   |
| 3/14/2021 23:15:00 | 0   |
| 3/14/2021 23:45:00 | 0   |
| 3/15/2021 0:15:00  | 0   |
| 3/15/2021 0:45:00  | 0   |
| 3/15/2021 1:15:00  | 0   |
| 3/15/2021 1:45:00  | 0   |
| 3/15/2021 2:15:00  | 0   |
| 3/15/2021 2:45:00  | 0   |
| 3/15/2021 3:15:00  | 0   |
| 3/15/2021 3:45:00  | 0   |
| 3/15/2021 4:15:00  | 0   |
| 3/15/2021 4:45:00  | 0   |
| 3/15/2021 5:15:00  | 0   |
| 3/15/2021 5:45:00  | 0   |
| 3/15/2021 6:15:00  | 0   |
| 3/15/2021 6:45:00  | 0   |
| 3/15/2021 7:15:00  | 0   |
| 3/15/2021 7:45:00  | 21  |
| 3/15/2021 8:15:00  | 42  |
| 3/15/2021 8:45:00  | 577 |
| 3/15/2021 9:15:00  | 812 |



|                    |     |
|--------------------|-----|
| 3/15/2021 9:45:00  | 890 |
| 3/15/2021 10:15:00 | 902 |
| 3/15/2021 10:45:00 | 890 |
| 3/15/2021 11:15:00 | 928 |
| 3/15/2021 11:45:00 | 788 |
| 3/15/2021 12:15:00 | 115 |
| 3/15/2021 12:45:00 | 772 |
| 3/15/2021 13:15:00 | 634 |
| 3/15/2021 13:45:00 | 743 |
| 3/15/2021 14:15:00 | 4   |
| 3/15/2021 14:45:00 | 0   |
| 3/15/2021 15:15:00 | 0   |
| 3/15/2021 15:45:00 | 0   |
| 3/15/2021 16:15:00 | 0   |
| 3/15/2021 16:45:00 | 0   |
| 3/15/2021 17:15:00 | 0   |
| 3/15/2021 17:45:00 | 95  |
| 3/15/2021 18:15:00 | 16  |
| 3/15/2021 18:45:00 | 0   |
| 3/15/2021 19:15:00 | 0   |
| 3/15/2021 19:45:00 | 0   |
| 3/15/2021 20:15:00 | 0   |
| 3/15/2021 20:45:00 | 0   |
| 3/15/2021 21:15:00 | 0   |
| 3/15/2021 21:45:00 | 0   |
| 3/15/2021 22:15:00 | 0   |
| 3/15/2021 22:45:00 | 0   |
| 3/15/2021 23:15:00 | 0   |
| 3/15/2021 23:45:00 | 0   |
| 3/16/2021 0:15:00  | 0   |
| 3/16/2021 0:45:00  | 0   |

|                    |     |
|--------------------|-----|
| 3/16/2021 1:15:00  | 0   |
| 3/16/2021 1:45:00  | 0   |
| 3/16/2021 2:15:00  | 0   |
| 3/16/2021 2:45:00  | 0   |
| 3/16/2021 3:15:00  | 0   |
| 3/16/2021 3:45:00  | 0   |
| 3/16/2021 4:15:00  | 0   |
| 3/16/2021 4:45:00  | 0   |
| 3/16/2021 5:15:00  | 0   |
| 3/16/2021 5:45:00  | 0   |
| 3/16/2021 6:15:00  | 0   |
| 3/16/2021 6:45:00  | 0   |
| 3/16/2021 7:15:00  | 193 |
| 3/16/2021 7:45:00  | 389 |
| 3/16/2021 8:15:00  | 674 |
| 3/16/2021 8:45:00  | 794 |
| 3/16/2021 9:15:00  | 859 |
| 3/16/2021 9:45:00  | 900 |
| 3/16/2021 10:15:00 | 931 |
| 3/16/2021 10:45:00 | 878 |
| 3/16/2021 11:15:00 | 966 |
| 3/16/2021 11:45:00 | 975 |
| 3/16/2021 12:15:00 | 975 |
| 3/16/2021 12:45:00 | 982 |
| 3/16/2021 13:15:00 | 981 |
| 3/16/2021 13:45:00 | 845 |
| 3/16/2021 14:15:00 | 279 |
| 3/16/2021 14:45:00 | 801 |
| 3/16/2021 15:15:00 | 828 |
| 3/16/2021 15:45:00 | 731 |
| 3/16/2021 16:15:00 | 31  |

|                    |     |
|--------------------|-----|
| 3/16/2021 16:45:00 | 29  |
| 3/16/2021 17:15:00 | 523 |
| 3/16/2021 17:45:00 | 431 |
| 3/16/2021 18:15:00 | 56  |
| 3/16/2021 18:45:00 | 0   |
| 3/16/2021 19:15:00 | 0   |
| 3/16/2021 19:45:00 | 0   |
| 3/16/2021 20:15:00 | 0   |
| 3/16/2021 20:45:00 | 0   |
| 3/16/2021 21:15:00 | 0   |
| 3/16/2021 21:45:00 | 0   |
| 3/16/2021 22:15:00 | 0   |
| 3/16/2021 22:45:00 | 0   |
| 3/16/2021 23:15:00 | 0   |
| 3/16/2021 23:45:00 | 0   |
| 3/17/2021 0:15:00  | 0   |
| 3/17/2021 0:45:00  | 0   |
| 3/17/2021 1:15:00  | 0   |
| 3/17/2021 1:45:00  | 0   |
| 3/17/2021 2:15:00  | 0   |
| 3/17/2021 2:45:00  | 0   |
| 3/17/2021 3:15:00  | 0   |
| 3/17/2021 3:45:00  | 0   |
| 3/17/2021 4:15:00  | 0   |
| 3/17/2021 4:45:00  | 0   |
| 3/17/2021 5:15:00  | 0   |
| 3/17/2021 5:45:00  | 0   |
| 3/17/2021 6:15:00  | 0   |
| 3/17/2021 6:45:00  | 0   |
| 3/17/2021 7:15:00  | 109 |
| 3/17/2021 7:45:00  | 419 |

|                    |     |
|--------------------|-----|
| 3/17/2021 8:15:00  | 716 |
| 3/17/2021 8:45:00  | 803 |
| 3/17/2021 9:15:00  | 848 |
| 3/17/2021 9:45:00  | 901 |
| 3/17/2021 10:15:00 | 925 |
| 3/17/2021 10:45:00 | 880 |
| 3/17/2021 11:15:00 | 952 |
| 3/17/2021 11:45:00 | 963 |
| 3/17/2021 12:15:00 | 969 |
| 3/17/2021 12:45:00 | 972 |
| 3/17/2021 13:15:00 | 964 |
| 3/17/2021 13:45:00 | 962 |
| 3/17/2021 14:15:00 | 949 |
| 3/17/2021 14:45:00 | 905 |
| 3/17/2021 15:15:00 | 751 |
| 3/17/2021 15:45:00 | 510 |
| 3/17/2021 16:15:00 | 776 |
| 3/17/2021 16:45:00 | 805 |
| 3/17/2021 17:15:00 | 710 |
| 3/17/2021 17:45:00 | 528 |
| 3/17/2021 18:15:00 | 269 |
| 3/17/2021 18:45:00 | 0   |
| 3/17/2021 19:15:00 | 0   |
| 3/17/2021 19:45:00 | 0   |
| 3/17/2021 20:15:00 | 0   |
| 3/17/2021 20:45:00 | 0   |
| 3/17/2021 21:15:00 | 0   |
| 3/17/2021 21:45:00 | 0   |
| 3/17/2021 22:15:00 | 0   |
| 3/17/2021 22:45:00 | 0   |
| 3/17/2021 23:15:00 | 0   |

|                    |     |
|--------------------|-----|
| 3/17/2021 23:45:00 | 0   |
| 3/18/2021 0:15:00  | 0   |
| 3/18/2021 0:45:00  | 0   |
| 3/18/2021 1:15:00  | 0   |
| 3/18/2021 1:45:00  | 0   |
| 3/18/2021 2:15:00  | 0   |
| 3/18/2021 2:45:00  | 0   |
| 3/18/2021 3:15:00  | 0   |
| 3/18/2021 3:45:00  | 0   |
| 3/18/2021 4:15:00  | 0   |
| 3/18/2021 4:45:00  | 0   |
| 3/18/2021 5:15:00  | 0   |
| 3/18/2021 5:45:00  | 0   |
| 3/18/2021 6:15:00  | 0   |
| 3/18/2021 6:45:00  | 0   |
| 3/18/2021 7:15:00  | 279 |
| 3/18/2021 7:45:00  | 522 |
| 3/18/2021 8:15:00  | 717 |
| 3/18/2021 8:45:00  | 806 |
| 3/18/2021 9:15:00  | 862 |
| 3/18/2021 9:45:00  | 902 |
| 3/18/2021 10:15:00 | 919 |
| 3/18/2021 10:45:00 | 935 |
| 3/18/2021 11:15:00 | 954 |
| 3/18/2021 11:45:00 | 957 |
| 3/18/2021 12:15:00 | 970 |
| 3/18/2021 12:45:00 | 982 |
| 3/18/2021 13:15:00 | 981 |
| 3/18/2021 13:45:00 | 975 |
| 3/18/2021 14:15:00 | 966 |
| 3/18/2021 14:45:00 | 952 |

|                    |     |
|--------------------|-----|
| 3/18/2021 15:15:00 | 932 |
| 3/18/2021 15:45:00 | 902 |
| 3/18/2021 16:15:00 | 862 |
| 3/18/2021 16:45:00 | 806 |
| 3/18/2021 17:15:00 | 721 |
| 3/18/2021 17:45:00 | 564 |
| 3/18/2021 18:15:00 | 207 |
| 3/18/2021 18:45:00 | 0   |
| 3/18/2021 19:15:00 | 0   |
| 3/18/2021 19:45:00 | 0   |
| 3/18/2021 20:15:00 | 0   |
| 3/18/2021 20:45:00 | 0   |
| 3/18/2021 21:15:00 | 0   |
| 3/18/2021 21:45:00 | 0   |
| 3/18/2021 22:15:00 | 0   |
| 3/18/2021 22:45:00 | 0   |
| 3/18/2021 23:15:00 | 0   |
| 3/18/2021 23:45:00 | 0   |
| 3/19/2021 0:15:00  | 0   |
| 3/19/2021 0:45:00  | 0   |
| 3/19/2021 1:15:00  | 0   |
| 3/19/2021 1:45:00  | 0   |
| 3/19/2021 2:15:00  | 0   |
| 3/19/2021 2:45:00  | 0   |
| 3/19/2021 3:15:00  | 0   |
| 3/19/2021 3:45:00  | 0   |
| 3/19/2021 4:15:00  | 0   |
| 3/19/2021 4:45:00  | 0   |
| 3/19/2021 5:15:00  | 0   |
| 3/19/2021 5:45:00  | 0   |
| 3/19/2021 6:15:00  | 0   |

|                    |     |
|--------------------|-----|
| 3/19/2021 6:45:00  | 0   |
| 3/19/2021 7:15:00  | 210 |
| 3/19/2021 7:45:00  | 443 |
| 3/19/2021 8:15:00  | 719 |
| 3/19/2021 8:45:00  | 807 |
| 3/19/2021 9:15:00  | 863 |
| 3/19/2021 9:45:00  | 902 |
| 3/19/2021 10:15:00 | 932 |
| 3/19/2021 10:45:00 | 952 |
| 3/19/2021 11:15:00 | 966 |
| 3/19/2021 11:45:00 | 975 |
| 3/19/2021 12:15:00 | 981 |
| 3/19/2021 12:45:00 | 982 |
| 3/19/2021 13:15:00 | 981 |
| 3/19/2021 13:45:00 | 975 |
| 3/19/2021 14:15:00 | 966 |
| 3/19/2021 14:45:00 | 931 |
| 3/19/2021 15:15:00 | 932 |
| 3/19/2021 15:45:00 | 902 |
| 3/19/2021 16:15:00 | 862 |
| 3/19/2021 16:45:00 | 806 |
| 3/19/2021 17:15:00 | 715 |
| 3/19/2021 17:45:00 | 444 |
| 3/19/2021 18:15:00 | 113 |
| 3/19/2021 18:45:00 | 0   |
| 3/19/2021 19:15:00 | 0   |
| 3/19/2021 19:45:00 | 0   |
| 3/19/2021 20:15:00 | 0   |
| 3/19/2021 20:45:00 | 0   |
| 3/19/2021 21:15:00 | 0   |
| 3/19/2021 21:45:00 | 0   |

|                    |     |
|--------------------|-----|
| 3/19/2021 22:15:00 | 0   |
| 3/19/2021 22:45:00 | 0   |
| 3/19/2021 23:15:00 | 0   |
| 3/19/2021 23:45:00 | 0   |
| 3/20/2021 0:15:00  | 0   |
| 3/20/2021 0:45:00  | 0   |
| 3/20/2021 1:15:00  | 0   |
| 3/20/2021 1:45:00  | 0   |
| 3/20/2021 2:15:00  | 0   |
| 3/20/2021 2:45:00  | 0   |
| 3/20/2021 3:15:00  | 0   |
| 3/20/2021 3:45:00  | 0   |
| 3/20/2021 4:15:00  | 0   |
| 3/20/2021 4:45:00  | 0   |
| 3/20/2021 5:15:00  | 0   |
| 3/20/2021 5:45:00  | 0   |
| 3/20/2021 6:15:00  | 0   |
| 3/20/2021 6:45:00  | 0   |
| 3/20/2021 7:15:00  | 235 |
| 3/20/2021 7:45:00  | 546 |
| 3/20/2021 8:15:00  | 717 |
| 3/20/2021 8:45:00  | 809 |
| 3/20/2021 9:15:00  | 864 |
| 3/20/2021 9:45:00  | 903 |
| 3/20/2021 10:15:00 | 929 |
| 3/20/2021 10:45:00 | 937 |
| 3/20/2021 11:15:00 | 963 |
| 3/20/2021 11:45:00 | 975 |
| 3/20/2021 12:15:00 | 981 |
| 3/20/2021 12:45:00 | 982 |
| 3/20/2021 13:15:00 | 981 |



|                    |     |
|--------------------|-----|
| 3/20/2021 13:45:00 | 975 |
| 3/20/2021 14:15:00 | 966 |
| 3/20/2021 14:45:00 | 952 |
| 3/20/2021 15:15:00 | 932 |
| 3/20/2021 15:45:00 | 902 |
| 3/20/2021 16:15:00 | 833 |
| 3/20/2021 16:45:00 | 785 |
| 3/20/2021 17:15:00 | 708 |
| 3/20/2021 17:45:00 | 500 |
| 3/20/2021 18:15:00 | 226 |
| 3/20/2021 18:45:00 | 0   |
| 3/20/2021 19:15:00 | 0   |
| 3/20/2021 19:45:00 | 0   |
| 3/20/2021 20:15:00 | 0   |
| 3/20/2021 20:45:00 | 0   |
| 3/20/2021 21:15:00 | 0   |
| 3/20/2021 21:45:00 | 0   |
| 3/20/2021 22:15:00 | 0   |
| 3/20/2021 22:45:00 | 0   |
| 3/20/2021 23:15:00 | 0   |
| 3/20/2021 23:45:00 | 0   |
| 3/21/2021 0:15:00  | 0   |
| 3/21/2021 0:45:00  | 0   |
| 3/21/2021 1:15:00  | 0   |
| 3/21/2021 1:45:00  | 0   |
| 3/21/2021 2:15:00  | 0   |
| 3/21/2021 2:45:00  | 0   |
| 3/21/2021 3:15:00  | 0   |
| 3/21/2021 3:45:00  | 0   |
| 3/21/2021 4:15:00  | 0   |
| 3/21/2021 4:45:00  | 0   |

|                    |     |
|--------------------|-----|
| 3/21/2021 5:15:00  | 0   |
| 3/21/2021 5:45:00  | 0   |
| 3/21/2021 6:15:00  | 0   |
| 3/21/2021 6:45:00  | 0   |
| 3/21/2021 7:15:00  | 238 |
| 3/21/2021 7:45:00  | 548 |
| 3/21/2021 8:15:00  | 724 |
| 3/21/2021 8:45:00  | 811 |
| 3/21/2021 9:15:00  | 865 |
| 3/21/2021 9:45:00  | 901 |
| 3/21/2021 10:15:00 | 923 |
| 3/21/2021 10:45:00 | 953 |
| 3/21/2021 11:15:00 | 966 |
| 3/21/2021 11:45:00 | 976 |
| 3/21/2021 12:15:00 | 981 |
| 3/21/2021 12:45:00 | 982 |
| 3/21/2021 13:15:00 | 977 |
| 3/21/2021 13:45:00 | 955 |
| 3/21/2021 14:15:00 | 966 |
| 3/21/2021 14:45:00 | 952 |
| 3/21/2021 15:15:00 | 932 |
| 3/21/2021 15:45:00 | 881 |
| 3/21/2021 16:15:00 | 842 |
| 3/21/2021 16:45:00 | 733 |
| 3/21/2021 17:15:00 | 516 |
| 3/21/2021 17:45:00 | 333 |
| 3/21/2021 18:15:00 | 154 |
| 3/21/2021 18:45:00 | 0   |
| 3/21/2021 19:15:00 | 0   |
| 3/21/2021 19:45:00 | 0   |
| 3/21/2021 20:15:00 | 0   |

|                    |     |
|--------------------|-----|
| 3/21/2021 20:45:00 | 0   |
| 3/21/2021 21:15:00 | 0   |
| 3/21/2021 21:45:00 | 0   |
| 3/21/2021 22:15:00 | 0   |
| 3/21/2021 22:45:00 | 0   |
| 3/21/2021 23:15:00 | 0   |
| 3/21/2021 23:45:00 | 0   |
| 3/22/2021 0:15:00  | 0   |
| 3/22/2021 0:45:00  | 0   |
| 3/22/2021 1:15:00  | 0   |
| 3/22/2021 1:45:00  | 0   |
| 3/22/2021 2:15:00  | 0   |
| 3/22/2021 2:45:00  | 0   |
| 3/22/2021 3:15:00  | 0   |
| 3/22/2021 3:45:00  | 0   |
| 3/22/2021 4:15:00  | 0   |
| 3/22/2021 4:45:00  | 0   |
| 3/22/2021 5:15:00  | 0   |
| 3/22/2021 5:45:00  | 0   |
| 3/22/2021 6:15:00  | 0   |
| 3/22/2021 6:45:00  | 0   |
| 3/22/2021 7:15:00  | 231 |
| 3/22/2021 7:45:00  | 560 |
| 3/22/2021 8:15:00  | 722 |
| 3/22/2021 8:45:00  | 812 |
| 3/22/2021 9:15:00  | 860 |
| 3/22/2021 9:45:00  | 903 |
| 3/22/2021 10:15:00 | 932 |
| 3/22/2021 10:45:00 | 953 |
| 3/22/2021 11:15:00 | 967 |
| 3/22/2021 11:45:00 | 976 |

|                    |     |
|--------------------|-----|
| 3/22/2021 12:15:00 | 978 |
| 3/22/2021 12:45:00 | 973 |
| 3/22/2021 13:15:00 | 978 |
| 3/22/2021 13:45:00 | 969 |
| 3/22/2021 14:15:00 | 964 |
| 3/22/2021 14:45:00 | 952 |
| 3/22/2021 15:15:00 | 880 |
| 3/22/2021 15:45:00 | 795 |
| 3/22/2021 16:15:00 | 781 |
| 3/22/2021 16:45:00 | 746 |
| 3/22/2021 17:15:00 | 643 |
| 3/22/2021 17:45:00 | 469 |
| 3/22/2021 18:15:00 | 218 |
| 3/22/2021 18:45:00 | 0   |
| 3/22/2021 19:15:00 | 0   |
| 3/22/2021 19:45:00 | 0   |
| 3/22/2021 20:15:00 | 0   |
| 3/22/2021 20:45:00 | 0   |
| 3/22/2021 21:15:00 | 0   |
| 3/22/2021 21:45:00 | 0   |
| 3/22/2021 22:15:00 | 0   |
| 3/22/2021 22:45:00 | 0   |
| 3/22/2021 23:15:00 | 0   |
| 3/22/2021 23:45:00 | 0   |
| 3/23/2021 0:15:00  | 0   |
| 3/23/2021 0:45:00  | 0   |
| 3/23/2021 1:15:00  | 0   |
| 3/23/2021 1:45:00  | 0   |
| 3/23/2021 2:15:00  | 0   |
| 3/23/2021 2:45:00  | 0   |
| 3/23/2021 3:15:00  | 0   |

|                    |     |
|--------------------|-----|
| 3/23/2021 3:45:00  | 0   |
| 3/23/2021 4:15:00  | 0   |
| 3/23/2021 4:45:00  | 0   |
| 3/23/2021 5:15:00  | 0   |
| 3/23/2021 5:45:00  | 0   |
| 3/23/2021 6:15:00  | 0   |
| 3/23/2021 6:45:00  | 0   |
| 3/23/2021 7:15:00  | 255 |
| 3/23/2021 7:45:00  | 555 |
| 3/23/2021 8:15:00  | 717 |
| 3/23/2021 8:45:00  | 809 |
| 3/23/2021 9:15:00  | 861 |
| 3/23/2021 9:45:00  | 905 |
| 3/23/2021 10:15:00 | 934 |
| 3/23/2021 10:45:00 | 953 |
| 3/23/2021 11:15:00 | 967 |
| 3/23/2021 11:45:00 | 976 |
| 3/23/2021 12:15:00 | 981 |
| 3/23/2021 12:45:00 | 982 |
| 3/23/2021 13:15:00 | 980 |
| 3/23/2021 13:45:00 | 975 |
| 3/23/2021 14:15:00 | 966 |
| 3/23/2021 14:45:00 | 952 |
| 3/23/2021 15:15:00 | 932 |
| 3/23/2021 15:45:00 | 902 |
| 3/23/2021 16:15:00 | 862 |
| 3/23/2021 16:45:00 | 807 |
| 3/23/2021 17:15:00 | 720 |
| 3/23/2021 17:45:00 | 451 |
| 3/23/2021 18:15:00 | 192 |
| 3/23/2021 18:45:00 | 0   |

|                    |     |
|--------------------|-----|
| 3/23/2021 19:15:00 | 0   |
| 3/23/2021 19:45:00 | 0   |
| 3/23/2021 20:15:00 | 0   |
| 3/23/2021 20:45:00 | 0   |
| 3/23/2021 21:15:00 | 0   |
| 3/23/2021 21:45:00 | 0   |
| 3/23/2021 22:15:00 | 0   |
| 3/23/2021 22:45:00 | 0   |
| 3/23/2021 23:15:00 | 0   |
| 3/23/2021 23:45:00 | 0   |
| 3/24/2021 0:15:00  | 0   |
| 3/24/2021 0:45:00  | 0   |
| 3/24/2021 1:15:00  | 0   |
| 3/24/2021 1:45:00  | 0   |
| 3/24/2021 2:15:00  | 0   |
| 3/24/2021 2:45:00  | 0   |
| 3/24/2021 3:15:00  | 0   |
| 3/24/2021 3:45:00  | 0   |
| 3/24/2021 4:15:00  | 0   |
| 3/24/2021 4:45:00  | 0   |
| 3/24/2021 5:15:00  | 0   |
| 3/24/2021 5:45:00  | 0   |
| 3/24/2021 6:15:00  | 0   |
| 3/24/2021 6:45:00  | 0   |
| 3/24/2021 7:15:00  | 253 |
| 3/24/2021 7:45:00  | 550 |
| 3/24/2021 8:15:00  | 727 |
| 3/24/2021 8:45:00  | 815 |
| 3/24/2021 9:15:00  | 868 |
| 3/24/2021 9:45:00  | 906 |
| 3/24/2021 10:15:00 | 935 |

|                    |     |
|--------------------|-----|
| 3/24/2021 10:45:00 | 954 |
| 3/24/2021 11:15:00 | 967 |
| 3/24/2021 11:45:00 | 976 |
| 3/24/2021 12:15:00 | 980 |
| 3/24/2021 12:45:00 | 982 |
| 3/24/2021 13:15:00 | 965 |
| 3/24/2021 13:45:00 | 975 |
| 3/24/2021 14:15:00 | 965 |
| 3/24/2021 14:45:00 | 952 |
| 3/24/2021 15:15:00 | 922 |
| 3/24/2021 15:45:00 | 902 |
| 3/24/2021 16:15:00 | 863 |
| 3/24/2021 16:45:00 | 807 |
| 3/24/2021 17:15:00 | 732 |
| 3/24/2021 17:45:00 | 563 |
| 3/24/2021 18:15:00 | 249 |
| 3/24/2021 18:45:00 | 0   |
| 3/24/2021 19:15:00 | 0   |
| 3/24/2021 19:45:00 | 0   |
| 3/24/2021 20:15:00 | 0   |
| 3/24/2021 20:45:00 | 0   |
| 3/24/2021 21:15:00 | 0   |
| 3/24/2021 21:45:00 | 0   |
| 3/24/2021 22:15:00 | 0   |
| 3/24/2021 22:45:00 | 0   |
| 3/24/2021 23:15:00 | 0   |
| 3/24/2021 23:45:00 | 0   |
| 3/25/2021 0:15:00  | 0   |
| 3/25/2021 0:45:00  | 0   |
| 3/25/2021 1:15:00  | 0   |
| 3/25/2021 1:45:00  | 0   |

|                    |     |
|--------------------|-----|
| 3/25/2021 2:15:00  | 0   |
| 3/25/2021 2:45:00  | 0   |
| 3/25/2021 3:15:00  | 0   |
| 3/25/2021 3:45:00  | 0   |
| 3/25/2021 4:15:00  | 0   |
| 3/25/2021 4:45:00  | 0   |
| 3/25/2021 5:15:00  | 0   |
| 3/25/2021 5:45:00  | 0   |
| 3/25/2021 6:15:00  | 0   |
| 3/25/2021 6:45:00  | 0   |
| 3/25/2021 7:15:00  | 250 |
| 3/25/2021 7:45:00  | 544 |
| 3/25/2021 8:15:00  | 730 |
| 3/25/2021 8:45:00  | 817 |
| 3/25/2021 9:15:00  | 869 |
| 3/25/2021 9:45:00  | 907 |
| 3/25/2021 10:15:00 | 935 |
| 3/25/2021 10:45:00 | 954 |
| 3/25/2021 11:15:00 | 967 |
| 3/25/2021 11:45:00 | 976 |
| 3/25/2021 12:15:00 | 980 |
| 3/25/2021 12:45:00 | 982 |
| 3/25/2021 13:15:00 | 980 |
| 3/25/2021 13:45:00 | 975 |
| 3/25/2021 14:15:00 | 965 |
| 3/25/2021 14:45:00 | 951 |
| 3/25/2021 15:15:00 | 932 |
| 3/25/2021 15:45:00 | 883 |
| 3/25/2021 16:15:00 | 862 |
| 3/25/2021 16:45:00 | 797 |
| 3/25/2021 17:15:00 | 707 |



|                    |     |
|--------------------|-----|
| 3/25/2021 17:45:00 | 544 |
| 3/25/2021 18:15:00 | 272 |
| 3/25/2021 18:45:00 | 0   |
| 3/25/2021 19:15:00 | 0   |
| 3/25/2021 19:45:00 | 0   |
| 3/25/2021 20:15:00 | 0   |
| 3/25/2021 20:45:00 | 0   |
| 3/25/2021 21:15:00 | 0   |
| 3/25/2021 21:45:00 | 0   |
| 3/25/2021 22:15:00 | 0   |
| 3/25/2021 22:45:00 | 0   |
| 3/25/2021 23:15:00 | 0   |
| 3/25/2021 23:45:00 | 0   |
| 3/26/2021 0:15:00  | 0   |
| 3/26/2021 0:45:00  | 0   |
| 3/26/2021 1:15:00  | 0   |
| 3/26/2021 1:45:00  | 0   |
| 3/26/2021 2:15:00  | 0   |
| 3/26/2021 2:45:00  | 0   |
| 3/26/2021 3:15:00  | 0   |
| 3/26/2021 3:45:00  | 0   |
| 3/26/2021 4:15:00  | 0   |
| 3/26/2021 4:45:00  | 0   |
| 3/26/2021 5:15:00  | 0   |
| 3/26/2021 5:45:00  | 0   |
| 3/26/2021 6:15:00  | 0   |
| 3/26/2021 6:45:00  | 0   |
| 3/26/2021 7:15:00  | 217 |
| 3/26/2021 7:45:00  | 422 |
| 3/26/2021 8:15:00  | 683 |
| 3/26/2021 8:45:00  | 812 |

|                    |     |
|--------------------|-----|
| 3/26/2021 9:15:00  | 867 |
| 3/26/2021 9:45:00  | 904 |
| 3/26/2021 10:15:00 | 935 |
| 3/26/2021 10:45:00 | 954 |
| 3/26/2021 11:15:00 | 956 |
| 3/26/2021 11:45:00 | 948 |
| 3/26/2021 12:15:00 | 962 |
| 3/26/2021 12:45:00 | 977 |
| 3/26/2021 13:15:00 | 911 |
| 3/26/2021 13:45:00 | 898 |
| 3/26/2021 14:15:00 | 889 |
| 3/26/2021 14:45:00 | 794 |
| 3/26/2021 15:15:00 | 158 |
| 3/26/2021 15:45:00 | 532 |
| 3/26/2021 16:15:00 | 55  |
| 3/26/2021 16:45:00 | 87  |
| 3/26/2021 17:15:00 | 332 |
| 3/26/2021 17:45:00 | 498 |
| 3/26/2021 18:15:00 | 242 |
| 3/26/2021 18:45:00 | 0   |
| 3/26/2021 19:15:00 | 0   |
| 3/26/2021 19:45:00 | 0   |
| 3/26/2021 20:15:00 | 0   |
| 3/26/2021 20:45:00 | 0   |
| 3/26/2021 21:15:00 | 0   |
| 3/26/2021 21:45:00 | 0   |
| 3/26/2021 22:15:00 | 0   |
| 3/26/2021 22:45:00 | 0   |
| 3/26/2021 23:15:00 | 0   |
| 3/26/2021 23:45:00 | 0   |
| 3/27/2021 0:15:00  | 0   |

|                    |     |
|--------------------|-----|
| 3/27/2021 0:45:00  | 0   |
| 3/27/2021 1:15:00  | 0   |
| 3/27/2021 1:45:00  | 0   |
| 3/27/2021 2:15:00  | 0   |
| 3/27/2021 2:45:00  | 0   |
| 3/27/2021 3:15:00  | 0   |
| 3/27/2021 3:45:00  | 0   |
| 3/27/2021 4:15:00  | 0   |
| 3/27/2021 4:45:00  | 0   |
| 3/27/2021 5:15:00  | 0   |
| 3/27/2021 5:45:00  | 0   |
| 3/27/2021 6:15:00  | 0   |
| 3/27/2021 6:45:00  | 0   |
| 3/27/2021 7:15:00  | 213 |
| 3/27/2021 7:45:00  | 430 |
| 3/27/2021 8:15:00  | 693 |
| 3/27/2021 8:45:00  | 819 |
| 3/27/2021 9:15:00  | 871 |
| 3/27/2021 9:45:00  | 908 |
| 3/27/2021 10:15:00 | 936 |
| 3/27/2021 10:45:00 | 954 |
| 3/27/2021 11:15:00 | 967 |
| 3/27/2021 11:45:00 | 966 |
| 3/27/2021 12:15:00 | 963 |
| 3/27/2021 12:45:00 | 851 |
| 3/27/2021 13:15:00 | 498 |
| 3/27/2021 13:45:00 | 32  |
| 3/27/2021 14:15:00 | 1   |
| 3/27/2021 14:45:00 | 0   |
| 3/27/2021 15:15:00 | 0   |
| 3/27/2021 15:45:00 | 0   |

|                    |     |
|--------------------|-----|
| 3/27/2021 16:15:00 | 0   |
| 3/27/2021 16:45:00 | 0   |
| 3/27/2021 17:15:00 | 0   |
| 3/27/2021 17:45:00 | 333 |
| 3/27/2021 18:15:00 | 287 |
| 3/27/2021 18:45:00 | 0   |
| 3/27/2021 19:15:00 | 0   |
| 3/27/2021 19:45:00 | 0   |
| 3/27/2021 20:15:00 | 0   |
| 3/27/2021 20:45:00 | 0   |
| 3/27/2021 21:15:00 | 0   |
| 3/27/2021 21:45:00 | 0   |
| 3/27/2021 22:15:00 | 0   |
| 3/27/2021 22:45:00 | 0   |
| 3/27/2021 23:15:00 | 0   |
| 3/27/2021 23:45:00 | 0   |
| 3/28/2021 0:15:00  | 0   |
| 3/28/2021 0:45:00  | 0   |
| 3/28/2021 1:15:00  | 0   |
| 3/28/2021 1:45:00  | 0   |
| 3/28/2021 2:15:00  | 0   |
| 3/28/2021 2:45:00  | 0   |
| 3/28/2021 3:15:00  | 0   |
| 3/28/2021 3:45:00  | 0   |
| 3/28/2021 4:15:00  | 0   |
| 3/28/2021 4:45:00  | 0   |
| 3/28/2021 5:15:00  | 0   |
| 3/28/2021 5:45:00  | 0   |
| 3/28/2021 6:15:00  | 0   |
| 3/28/2021 6:45:00  | 0   |
| 3/28/2021 7:15:00  | 317 |

|                    |     |
|--------------------|-----|
| 3/28/2021 7:45:00  | 550 |
| 3/28/2021 8:15:00  | 734 |
| 3/28/2021 8:45:00  | 821 |
| 3/28/2021 9:15:00  | 872 |
| 3/28/2021 9:45:00  | 908 |
| 3/28/2021 10:15:00 | 936 |
| 3/28/2021 10:45:00 | 954 |
| 3/28/2021 11:15:00 | 967 |
| 3/28/2021 11:45:00 | 967 |
| 3/28/2021 12:15:00 | 935 |
| 3/28/2021 12:45:00 | 923 |
| 3/28/2021 13:15:00 | 791 |
| 3/28/2021 13:45:00 | 910 |
| 3/28/2021 14:15:00 | 903 |
| 3/28/2021 14:45:00 | 928 |
| 3/28/2021 15:15:00 | 929 |
| 3/28/2021 15:45:00 | 810 |
| 3/28/2021 16:15:00 | 628 |
| 3/28/2021 16:45:00 | 535 |
| 3/28/2021 17:15:00 | 0   |
| 3/28/2021 17:45:00 | 258 |
| 3/28/2021 18:15:00 | 222 |
| 3/28/2021 18:45:00 | 0   |
| 3/28/2021 19:15:00 | 0   |
| 3/28/2021 19:45:00 | 0   |
| 3/28/2021 20:15:00 | 0   |
| 3/28/2021 20:45:00 | 0   |
| 3/28/2021 21:15:00 | 0   |
| 3/28/2021 21:45:00 | 0   |
| 3/28/2021 22:15:00 | 0   |
| 3/28/2021 22:45:00 | 0   |

|                    |     |
|--------------------|-----|
| 3/28/2021 23:15:00 | 0   |
| 3/28/2021 23:45:00 | 0   |
| 3/29/2021 0:15:00  | 0   |
| 3/29/2021 0:45:00  | 0   |
| 3/29/2021 1:15:00  | 0   |
| 3/29/2021 1:45:00  | 0   |
| 3/29/2021 2:15:00  | 0   |
| 3/29/2021 2:45:00  | 0   |
| 3/29/2021 3:15:00  | 0   |
| 3/29/2021 3:45:00  | 0   |
| 3/29/2021 4:15:00  | 0   |
| 3/29/2021 4:45:00  | 0   |
| 3/29/2021 5:15:00  | 0   |
| 3/29/2021 5:45:00  | 0   |
| 3/29/2021 6:15:00  | 0   |
| 3/29/2021 6:45:00  | 0   |
| 3/29/2021 7:15:00  | 406 |
| 3/29/2021 7:45:00  | 642 |
| 3/29/2021 8:15:00  | 742 |
| 3/29/2021 8:45:00  | 822 |
| 3/29/2021 9:15:00  | 872 |
| 3/29/2021 9:45:00  | 907 |
| 3/29/2021 10:15:00 | 936 |
| 3/29/2021 10:45:00 | 954 |
| 3/29/2021 11:15:00 | 861 |
| 3/29/2021 11:45:00 | 452 |
| 3/29/2021 12:15:00 | 477 |
| 3/29/2021 12:45:00 | 679 |
| 3/29/2021 13:15:00 | 359 |
| 3/29/2021 13:45:00 | 209 |
| 3/29/2021 14:15:00 | 122 |

|                    |     |
|--------------------|-----|
| 3/29/2021 14:45:00 | 343 |
| 3/29/2021 15:15:00 | 0   |
| 3/29/2021 15:45:00 | 34  |
| 3/29/2021 16:15:00 | 0   |
| 3/29/2021 16:45:00 | 0   |
| 3/29/2021 17:15:00 | 0   |
| 3/29/2021 17:45:00 | 276 |
| 3/29/2021 18:15:00 | 91  |
| 3/29/2021 18:45:00 | 0   |
| 3/29/2021 19:15:00 | 0   |
| 3/29/2021 19:45:00 | 0   |
| 3/29/2021 20:15:00 | 0   |
| 3/29/2021 20:45:00 | 0   |
| 3/29/2021 21:15:00 | 0   |
| 3/29/2021 21:45:00 | 0   |
| 3/29/2021 22:15:00 | 0   |
| 3/29/2021 22:45:00 | 0   |
| 3/29/2021 23:15:00 | 0   |
| 3/29/2021 23:45:00 | 0   |
| 3/30/2021 0:15:00  | 0   |
| 3/30/2021 0:45:00  | 0   |
| 3/30/2021 1:15:00  | 0   |
| 3/30/2021 1:45:00  | 0   |
| 3/30/2021 2:15:00  | 0   |
| 3/30/2021 2:45:00  | 0   |
| 3/30/2021 3:15:00  | 0   |
| 3/30/2021 3:45:00  | 0   |
| 3/30/2021 4:15:00  | 0   |
| 3/30/2021 4:45:00  | 0   |
| 3/30/2021 5:15:00  | 0   |
| 3/30/2021 5:45:00  | 0   |

|                    |     |
|--------------------|-----|
| 3/30/2021 6:15:00  | 0   |
| 3/30/2021 6:45:00  | 0   |
| 3/30/2021 7:15:00  | 380 |
| 3/30/2021 7:45:00  | 646 |
| 3/30/2021 8:15:00  | 745 |
| 3/30/2021 8:45:00  | 816 |
| 3/30/2021 9:15:00  | 873 |
| 3/30/2021 9:45:00  | 909 |
| 3/30/2021 10:15:00 | 936 |
| 3/30/2021 10:45:00 | 954 |
| 3/30/2021 11:15:00 | 967 |
| 3/30/2021 11:45:00 | 975 |
| 3/30/2021 12:15:00 | 972 |
| 3/30/2021 12:45:00 | 891 |
| 3/30/2021 13:15:00 | 943 |
| 3/30/2021 13:45:00 | 862 |
| 3/30/2021 14:15:00 | 517 |
| 3/30/2021 14:45:00 | 414 |
| 3/30/2021 15:15:00 | 710 |
| 3/30/2021 15:45:00 | 848 |
| 3/30/2021 16:15:00 | 822 |
| 3/30/2021 16:45:00 | 776 |
| 3/30/2021 17:15:00 | 696 |
| 3/30/2021 17:45:00 | 413 |
| 3/30/2021 18:15:00 | 186 |
| 3/30/2021 18:45:00 | 0   |
| 3/30/2021 19:15:00 | 0   |
| 3/30/2021 19:45:00 | 0   |
| 3/30/2021 20:15:00 | 0   |
| 3/30/2021 20:45:00 | 0   |
| 3/30/2021 21:15:00 | 0   |



|                    |     |
|--------------------|-----|
| 3/30/2021 21:45:00 | 0   |
| 3/30/2021 22:15:00 | 0   |
| 3/30/2021 22:45:00 | 0   |
| 3/30/2021 23:15:00 | 0   |
| 3/30/2021 23:45:00 | 0   |
| 3/31/2021 0:15:00  | 0   |
| 3/31/2021 0:45:00  | 0   |
| 3/31/2021 1:15:00  | 0   |
| 3/31/2021 1:45:00  | 0   |
| 3/31/2021 2:15:00  | 0   |
| 3/31/2021 2:45:00  | 0   |
| 3/31/2021 3:15:00  | 0   |
| 3/31/2021 3:45:00  | 0   |
| 3/31/2021 4:15:00  | 0   |
| 3/31/2021 4:45:00  | 0   |
| 3/31/2021 5:15:00  | 0   |
| 3/31/2021 5:45:00  | 0   |
| 3/31/2021 6:15:00  | 0   |
| 3/31/2021 6:45:00  | 0   |
| 3/31/2021 7:15:00  | 447 |
| 3/31/2021 7:45:00  | 651 |
| 3/31/2021 8:15:00  | 749 |
| 3/31/2021 8:45:00  | 825 |
| 3/31/2021 9:15:00  | 874 |
| 3/31/2021 9:45:00  | 910 |
| 3/31/2021 10:15:00 | 937 |
| 3/31/2021 10:45:00 | 954 |
| 3/31/2021 11:15:00 | 967 |
| 3/31/2021 11:45:00 | 975 |
| 3/31/2021 12:15:00 | 973 |
| 3/31/2021 12:45:00 | 966 |

|                    |     |
|--------------------|-----|
| 3/31/2021 13:15:00 | 961 |
| 3/31/2021 13:45:00 | 951 |
| 3/31/2021 14:15:00 | 824 |
| 3/31/2021 14:45:00 | 368 |
| 3/31/2021 15:15:00 | 0   |
| 3/31/2021 15:45:00 | 298 |
| 3/31/2021 16:15:00 | 155 |
| 3/31/2021 16:45:00 | 0   |
| 3/31/2021 17:15:00 | 0   |
| 3/31/2021 17:45:00 | 0   |
| 3/31/2021 18:15:00 | 0   |
| 3/31/2021 18:45:00 | 0   |
| 3/31/2021 19:15:00 | 0   |
| 3/31/2021 19:45:00 | 0   |
| 3/31/2021 20:15:00 | 0   |
| 3/31/2021 20:45:00 | 0   |
| 3/31/2021 21:15:00 | 0   |
| 3/31/2021 21:45:00 | 0   |
| 3/31/2021 22:15:00 | 0   |
| 3/31/2021 22:45:00 | 0   |
| 3/31/2021 23:15:00 | 0   |
| 3/31/2021 23:45:00 | 0   |

|                  |     |
|------------------|-----|
| 04/01/2021 00:15 | 0   |
| 04/01/2021 00:45 | 0   |
| 04/01/2021 01:15 | 0   |
| 04/01/2021 01:45 | 0   |
| 04/01/2021 02:15 | 0   |
| 04/01/2021 02:45 | 0   |
| 04/01/2021 03:15 | 0   |
| 04/01/2021 03:45 | 0   |
| 04/01/2021 04:15 | 0   |
| 04/01/2021 04:45 | 0   |
| 04/01/2021 05:15 | 0   |
| 04/01/2021 05:45 | 0   |
| 04/01/2021 06:15 | 0   |
| 04/01/2021 06:45 | 0   |
| 04/01/2021 07:15 | 200 |
| 04/01/2021 07:45 | 537 |
| 04/01/2021 08:15 | 660 |
| 04/01/2021 08:45 | 746 |
| 04/01/2021 09:15 | 769 |
| 04/01/2021 09:45 | 834 |
| 04/01/2021 10:15 | 860 |
| 04/01/2021 10:45 | 888 |
| 04/01/2021 11:15 | 878 |
| 04/01/2021 11:45 | 920 |
| 04/01/2021 12:15 | 915 |
| 04/01/2021 12:45 | 838 |
| 04/01/2021 13:15 | 215 |
| 04/01/2021 13:45 | 817 |
| 04/01/2021 14:15 | 909 |
| 04/01/2021 14:45 | 893 |
| 04/01/2021 15:15 | 870 |
| 04/01/2021 15:45 | 835 |
| 04/01/2021 16:15 | 789 |
| 04/01/2021 16:45 | 725 |
| 04/01/2021 17:15 | 644 |

---

|                  |     |
|------------------|-----|
| 04/01/2021 17:45 | 395 |
| 04/01/2021 18:15 | 162 |
| 04/01/2021 18:45 | 0   |
| 04/01/2021 19:15 | 0   |
| 04/01/2021 19:45 | 0   |
| 04/01/2021 20:15 | 0   |
| 04/01/2021 20:45 | 0   |
| 04/01/2021 21:15 | 0   |
| 04/01/2021 21:45 | 0   |
| 04/01/2021 22:15 | 0   |
| 04/01/2021 22:45 | 0   |
| 04/01/2021 23:15 | 0   |
| 04/01/2021 23:45 | 0   |
| 04/02/2021 00:15 | 0   |
| 04/02/2021 00:45 | 0   |
| 04/02/2021 01:15 | 0   |
| 04/02/2021 01:45 | 0   |
| 04/02/2021 02:15 | 0   |
| 04/02/2021 02:45 | 0   |
| 04/02/2021 03:15 | 0   |
| 04/02/2021 03:45 | 0   |
| 04/02/2021 04:15 | 0   |
| 04/02/2021 04:45 | 0   |
| 04/02/2021 05:15 | 0   |
| 04/02/2021 05:45 | 0   |
| 04/02/2021 06:15 | 0   |
| 04/02/2021 06:45 | 0   |
| 04/02/2021 07:15 | 298 |
| 04/02/2021 07:45 | 282 |
| 04/02/2021 08:15 | 554 |
| 04/02/2021 08:45 | 741 |

---

|                  |     |
|------------------|-----|
| 04/02/2021 09:15 | 791 |
| 04/02/2021 09:45 | 844 |
| 04/02/2021 10:15 | 842 |
| 04/02/2021 10:45 | 846 |
| 04/02/2021 11:15 | 816 |
| 04/02/2021 11:45 | 542 |
| 04/02/2021 12:15 | 331 |
| 04/02/2021 12:45 | 744 |
| 04/02/2021 13:15 | 854 |
| 04/02/2021 13:45 | 874 |
| 04/02/2021 14:15 | 753 |
| 04/02/2021 14:45 | 22  |
| 04/02/2021 15:15 | 0   |
| 04/02/2021 15:45 | 80  |
| 04/02/2021 16:15 | 272 |
| 04/02/2021 16:45 | 128 |
| 04/02/2021 17:15 | 537 |
| 04/02/2021 17:45 | 371 |
| 04/02/2021 18:15 | 0   |
| 04/02/2021 18:45 | 0   |
| 04/02/2021 19:15 | 0   |
| 04/02/2021 19:45 | 0   |
| 04/02/2021 20:15 | 0   |
| 04/02/2021 20:45 | 0   |
| 04/02/2021 21:15 | 0   |
| 04/02/2021 21:45 | 0   |
| 04/02/2021 22:15 | 0   |
| 04/02/2021 22:45 | 0   |
| 04/02/2021 23:15 | 0   |
| 04/02/2021 23:45 | 0   |
| 04/03/2021 00:15 | 0   |

---

|                  |     |
|------------------|-----|
| 04/03/2021 00:45 | 0   |
| 04/03/2021 01:15 | 0   |
| 04/03/2021 01:45 | 0   |
| 04/03/2021 02:15 | 0   |
| 04/03/2021 02:45 | 0   |
| 04/03/2021 03:15 | 0   |
| 04/03/2021 03:45 | 0   |
| 04/03/2021 04:15 | 0   |
| 04/03/2021 04:45 | 0   |
| 04/03/2021 05:15 | 0   |
| 04/03/2021 05:45 | 0   |
| 04/03/2021 06:15 | 0   |
| 04/03/2021 06:45 | 11  |
| 04/03/2021 07:15 | 316 |
| 04/03/2021 07:45 | 561 |
| 04/03/2021 08:15 | 673 |
| 04/03/2021 08:45 | 744 |
| 04/03/2021 09:15 | 785 |
| 04/03/2021 09:45 | 829 |
| 04/03/2021 10:15 | 844 |
| 04/03/2021 10:45 | 835 |
| 04/03/2021 11:15 | 830 |
| 04/03/2021 11:45 | 851 |
| 04/03/2021 12:15 | 778 |
| 04/03/2021 12:45 | 515 |
| 04/03/2021 13:15 | 229 |
| 04/03/2021 13:45 | 44  |
| 04/03/2021 14:15 | 98  |
| 04/03/2021 14:45 | 617 |
| 04/03/2021 15:15 | 124 |
| 04/03/2021 15:45 | 21  |

---

|                  |     |
|------------------|-----|
| 04/03/2021 16:15 | 535 |
| 04/03/2021 16:45 | 60  |
| 04/03/2021 17:15 | 459 |
| 04/03/2021 17:45 | 484 |
| 04/03/2021 18:15 | 169 |
| 04/03/2021 18:45 | 0   |
| 04/03/2021 19:15 | 0   |
| 04/03/2021 19:45 | 0   |
| 04/03/2021 20:15 | 0   |
| 04/03/2021 20:45 | 0   |
| 04/03/2021 21:15 | 0   |
| 04/03/2021 21:45 | 0   |
| 04/03/2021 22:15 | 0   |
| 04/03/2021 22:45 | 0   |
| 04/03/2021 23:15 | 0   |
| 04/03/2021 23:45 | 0   |
| 04/04/2021 00:15 | 0   |
| 04/04/2021 00:45 | 0   |
| 04/04/2021 01:15 | 0   |
| 04/04/2021 01:45 | 0   |
| 04/04/2021 02:15 | 0   |
| 04/04/2021 02:45 | 0   |
| 04/04/2021 03:15 | 0   |
| 04/04/2021 03:45 | 0   |
| 04/04/2021 04:15 | 0   |
| 04/04/2021 04:45 | 0   |
| 04/04/2021 05:15 | 0   |
| 04/04/2021 05:45 | 0   |
| 04/04/2021 06:15 | 0   |
| 04/04/2021 06:45 | 8   |
| 04/04/2021 07:15 | 200 |

---

|                  |     |
|------------------|-----|
| 04/04/2021 07:45 | 493 |
| 04/04/2021 08:15 | 662 |
| 04/04/2021 08:45 | 738 |
| 04/04/2021 09:15 | 796 |
| 04/04/2021 09:45 | 822 |
| 04/04/2021 10:15 | 810 |
| 04/04/2021 10:45 | 861 |
| 04/04/2021 11:15 | 859 |
| 04/04/2021 11:45 | 888 |
| 04/04/2021 12:15 | 878 |
| 04/04/2021 12:45 | 860 |
| 04/04/2021 13:15 | 890 |
| 04/04/2021 13:45 | 851 |
| 04/04/2021 14:15 | 632 |
| 04/04/2021 14:45 | 232 |
| 04/04/2021 15:15 | 150 |
| 04/04/2021 15:45 | 0   |
| 04/04/2021 16:15 | 0   |
| 04/04/2021 16:45 | 0   |
| 04/04/2021 17:15 | 0   |
| 04/04/2021 17:45 | 0   |
| 04/04/2021 18:15 | 88  |
| 04/04/2021 18:45 | 0   |
| 04/04/2021 19:15 | 0   |
| 04/04/2021 19:45 | 0   |
| 04/04/2021 20:15 | 0   |
| 04/04/2021 20:45 | 0   |
| 04/04/2021 21:15 | 0   |
| 04/04/2021 21:45 | 0   |
| 04/04/2021 22:15 | 0   |
| 04/04/2021 22:45 | 0   |

---



|                  |     |
|------------------|-----|
| 04/04/2021 23:15 | 0   |
| 04/04/2021 23:45 | 0   |
| 04/05/2021 00:15 | 0   |
| 04/05/2021 00:45 | 0   |
| 04/05/2021 01:15 | 0   |
| 04/05/2021 01:45 | 0   |
| 04/05/2021 02:15 | 0   |
| 04/05/2021 02:45 | 0   |
| 04/05/2021 03:15 | 0   |
| 04/05/2021 03:45 | 0   |
| 04/05/2021 04:15 | 0   |
| 04/05/2021 04:45 | 0   |
| 04/05/2021 05:15 | 0   |
| 04/05/2021 05:45 | 0   |
| 04/05/2021 06:15 | 0   |
| 04/05/2021 06:45 | 37  |
| 04/05/2021 07:15 | 331 |
| 04/05/2021 07:45 | 546 |
| 04/05/2021 08:15 | 671 |
| 04/05/2021 08:45 | 751 |
| 04/05/2021 09:15 | 798 |
| 04/05/2021 09:45 | 849 |
| 04/05/2021 10:15 | 866 |
| 04/05/2021 10:45 | 889 |
| 04/05/2021 11:15 | 910 |
| 04/05/2021 11:45 | 922 |
| 04/05/2021 12:15 | 926 |
| 04/05/2021 12:45 | 926 |
| 04/05/2021 13:15 | 926 |
| 04/05/2021 13:45 | 919 |
| 04/05/2021 14:15 | 908 |

---

|                  |     |
|------------------|-----|
| 04/05/2021 14:45 | 892 |
| 04/05/2021 15:15 | 870 |
| 04/05/2021 15:45 | 834 |
| 04/05/2021 16:15 | 789 |
| 04/05/2021 16:45 | 726 |
| 04/05/2021 17:15 | 539 |
| 04/05/2021 17:45 | 144 |
| 04/05/2021 18:15 | 153 |
| 04/05/2021 18:45 | 0   |
| 04/05/2021 19:15 | 0   |
| 04/05/2021 19:45 | 0   |
| 04/05/2021 20:15 | 0   |
| 04/05/2021 20:45 | 0   |
| 04/05/2021 21:15 | 0   |
| 04/05/2021 21:45 | 0   |
| 04/05/2021 22:15 | 0   |
| 04/05/2021 22:45 | 0   |
| 04/05/2021 23:15 | 0   |
| 04/05/2021 23:45 | 0   |
| 04/06/2021 00:15 | 0   |
| 04/06/2021 00:45 | 0   |
| 04/06/2021 01:15 | 0   |
| 04/06/2021 01:45 | 0   |
| 04/06/2021 02:15 | 0   |
| 04/06/2021 02:45 | 0   |
| 04/06/2021 03:15 | 0   |
| 04/06/2021 03:45 | 0   |
| 04/06/2021 04:15 | 0   |
| 04/06/2021 04:45 | 0   |
| 04/06/2021 05:15 | 0   |
| 04/06/2021 05:45 | 0   |

---

|                  |     |
|------------------|-----|
| 04/06/2021 06:15 | 0   |
| 04/06/2021 06:45 | 40  |
| 04/06/2021 07:15 | 317 |
| 04/06/2021 07:45 | 536 |
| 04/06/2021 08:15 | 678 |
| 04/06/2021 08:45 | 753 |
| 04/06/2021 09:15 | 792 |
| 04/06/2021 09:45 | 844 |
| 04/06/2021 10:15 | 855 |
| 04/06/2021 10:45 | 860 |
| 04/06/2021 11:15 | 892 |
| 04/06/2021 11:45 | 922 |
| 04/06/2021 12:15 | 919 |
| 04/06/2021 12:45 | 847 |
| 04/06/2021 13:15 | 624 |
| 04/06/2021 13:45 | 518 |
| 04/06/2021 14:15 | 741 |
| 04/06/2021 14:45 | 196 |
| 04/06/2021 15:15 | 89  |
| 04/06/2021 15:45 | 603 |
| 04/06/2021 16:15 | 701 |
| 04/06/2021 16:45 | 542 |
| 04/06/2021 17:15 | 137 |
| 04/06/2021 17:45 | 50  |
| 04/06/2021 18:15 | 20  |
| 04/06/2021 18:45 | 0   |
| 04/06/2021 19:15 | 0   |
| 04/06/2021 19:45 | 0   |
| 04/06/2021 20:15 | 0   |
| 04/06/2021 20:45 | 0   |
| 04/06/2021 21:15 | 0   |

---

|                  |     |
|------------------|-----|
| 04/06/2021 21:45 | 0   |
| 04/06/2021 22:15 | 0   |
| 04/06/2021 22:45 | 0   |
| 04/06/2021 23:15 | 0   |
| 04/06/2021 23:45 | 0   |
| 04/07/2021 00:15 | 0   |
| 04/07/2021 00:45 | 0   |
| 04/07/2021 01:15 | 0   |
| 04/07/2021 01:45 | 0   |
| 04/07/2021 02:15 | 0   |
| 04/07/2021 02:45 | 0   |
| 04/07/2021 03:15 | 0   |
| 04/07/2021 03:45 | 0   |
| 04/07/2021 04:15 | 0   |
| 04/07/2021 04:45 | 0   |
| 04/07/2021 05:15 | 0   |
| 04/07/2021 05:45 | 0   |
| 04/07/2021 06:15 | 0   |
| 04/07/2021 06:45 | 29  |
| 04/07/2021 07:15 | 313 |
| 04/07/2021 07:45 | 521 |
| 04/07/2021 08:15 | 675 |
| 04/07/2021 08:45 | 754 |
| 04/07/2021 09:15 | 803 |
| 04/07/2021 09:45 | 850 |
| 04/07/2021 10:15 | 865 |
| 04/07/2021 10:45 | 888 |
| 04/07/2021 11:15 | 913 |
| 04/07/2021 11:45 | 922 |
| 04/07/2021 12:15 | 919 |
| 04/07/2021 12:45 | 928 |

---

|                  |     |
|------------------|-----|
| 04/07/2021 13:15 | 925 |
| 04/07/2021 13:45 | 919 |
| 04/07/2021 14:15 | 902 |
| 04/07/2021 14:45 | 826 |
| 04/07/2021 15:15 | 523 |
| 04/07/2021 15:45 | 713 |
| 04/07/2021 16:15 | 333 |
| 04/07/2021 16:45 | 356 |
| 04/07/2021 17:15 | 0   |
| 04/07/2021 17:45 | 355 |
| 04/07/2021 18:15 | 0   |
| 04/07/2021 18:45 | 0   |
| 04/07/2021 19:15 | 0   |
| 04/07/2021 19:45 | 0   |
| 04/07/2021 20:15 | 0   |
| 04/07/2021 20:45 | 0   |
| 04/07/2021 21:15 | 0   |
| 04/07/2021 21:45 | 0   |
| 04/07/2021 22:15 | 0   |
| 04/07/2021 22:45 | 0   |
| 04/07/2021 23:15 | 0   |
| 04/07/2021 23:45 | 0   |
| 04/08/2021 00:15 | 0   |
| 04/08/2021 00:45 | 0   |
| 04/08/2021 01:15 | 0   |
| 04/08/2021 01:45 | 0   |
| 04/08/2021 02:15 | 0   |
| 04/08/2021 02:45 | 0   |
| 04/08/2021 03:15 | 0   |
| 04/08/2021 03:45 | 0   |
| 04/08/2021 04:15 | 0   |

---

|                  |     |
|------------------|-----|
| 04/08/2021 04:45 | 0   |
| 04/08/2021 05:15 | 0   |
| 04/08/2021 05:45 | 0   |
| 04/08/2021 06:15 | 0   |
| 04/08/2021 06:45 | 37  |
| 04/08/2021 07:15 | 353 |
| 04/08/2021 07:45 | 562 |
| 04/08/2021 08:15 | 667 |
| 04/08/2021 08:45 | 755 |
| 04/08/2021 09:15 | 809 |
| 04/08/2021 09:45 | 846 |
| 04/08/2021 10:15 | 865 |
| 04/08/2021 10:45 | 896 |
| 04/08/2021 11:15 | 913 |
| 04/08/2021 11:45 | 922 |
| 04/08/2021 12:15 | 927 |
| 04/08/2021 12:45 | 928 |
| 04/08/2021 13:15 | 925 |
| 04/08/2021 13:45 | 919 |
| 04/08/2021 14:15 | 908 |
| 04/08/2021 14:45 | 862 |
| 04/08/2021 15:15 | 613 |
| 04/08/2021 15:45 | 57  |
| 04/08/2021 16:15 | 256 |
| 04/08/2021 16:45 | 77  |
| 04/08/2021 17:15 | 249 |
| 04/08/2021 17:45 | 55  |
| 04/08/2021 18:15 | 153 |
| 04/08/2021 18:45 | 0   |
| 04/08/2021 19:15 | 0   |
| 04/08/2021 19:45 | 0   |

---

|                  |     |
|------------------|-----|
| 04/08/2021 20:15 | 0   |
| 04/08/2021 20:45 | 0   |
| 04/08/2021 21:15 | 0   |
| 04/08/2021 21:45 | 0   |
| 04/08/2021 22:15 | 0   |
| 04/08/2021 22:45 | 0   |
| 04/08/2021 23:15 | 0   |
| 04/08/2021 23:45 | 0   |
| 04/09/2021 00:15 | 0   |
| 04/09/2021 00:45 | 0   |
| 04/09/2021 01:15 | 0   |
| 04/09/2021 01:45 | 0   |
| 04/09/2021 02:15 | 0   |
| 04/09/2021 02:45 | 0   |
| 04/09/2021 03:15 | 0   |
| 04/09/2021 03:45 | 0   |
| 04/09/2021 04:15 | 0   |
| 04/09/2021 04:45 | 0   |
| 04/09/2021 05:15 | 0   |
| 04/09/2021 05:45 | 0   |
| 04/09/2021 06:15 | 0   |
| 04/09/2021 06:45 | 45  |
| 04/09/2021 07:15 | 361 |
| 04/09/2021 07:45 | 567 |
| 04/09/2021 08:15 | 681 |
| 04/09/2021 08:45 | 753 |
| 04/09/2021 09:15 | 810 |
| 04/09/2021 09:45 | 839 |
| 04/09/2021 10:15 | 855 |
| 04/09/2021 10:45 | 878 |
| 04/09/2021 11:15 | 900 |

---

|                  |     |
|------------------|-----|
| 04/09/2021 11:45 | 913 |
| 04/09/2021 12:15 | 927 |
| 04/09/2021 12:45 | 928 |
| 04/09/2021 13:15 | 898 |
| 04/09/2021 13:45 | 706 |
| 04/09/2021 14:15 | 852 |
| 04/09/2021 14:45 | 753 |
| 04/09/2021 15:15 | 539 |
| 04/09/2021 15:45 | 767 |
| 04/09/2021 16:15 | 789 |
| 04/09/2021 16:45 | 713 |
| 04/09/2021 17:15 | 595 |
| 04/09/2021 17:45 | 515 |
| 04/09/2021 18:15 | 260 |
| 04/09/2021 18:45 | 0   |
| 04/09/2021 19:15 | 0   |
| 04/09/2021 19:45 | 0   |
| 04/09/2021 20:15 | 0   |
| 04/09/2021 20:45 | 0   |
| 04/09/2021 21:15 | 0   |
| 04/09/2021 21:45 | 0   |
| 04/09/2021 22:15 | 0   |
| 04/09/2021 22:45 | 0   |
| 04/09/2021 23:15 | 0   |
| 04/09/2021 23:45 | 0   |
| 04/10/2021 00:15 | 0   |
| 04/10/2021 00:45 | 0   |
| 04/10/2021 01:15 | 0   |
| 04/10/2021 01:45 | 0   |
| 04/10/2021 02:15 | 0   |
| 04/10/2021 02:45 | 0   |

---



|                  |     |
|------------------|-----|
| 04/10/2021 03:15 | 0   |
| 04/10/2021 03:45 | 0   |
| 04/10/2021 04:15 | 0   |
| 04/10/2021 04:45 | 0   |
| 04/10/2021 05:15 | 0   |
| 04/10/2021 05:45 | 0   |
| 04/10/2021 06:15 | 0   |
| 04/10/2021 06:45 | 33  |
| 04/10/2021 07:15 | 338 |
| 04/10/2021 07:45 | 562 |
| 04/10/2021 08:15 | 667 |
| 04/10/2021 08:45 | 728 |
| 04/10/2021 09:15 | 811 |
| 04/10/2021 09:45 | 843 |
| 04/10/2021 10:15 | 868 |
| 04/10/2021 10:45 | 899 |
| 04/10/2021 11:15 | 913 |
| 04/10/2021 11:45 | 922 |
| 04/10/2021 12:15 | 926 |
| 04/10/2021 12:45 | 919 |
| 04/10/2021 13:15 | 925 |
| 04/10/2021 13:45 | 918 |
| 04/10/2021 14:15 | 895 |
| 04/10/2021 14:45 | 891 |
| 04/10/2021 15:15 | 869 |
| 04/10/2021 15:45 | 686 |
| 04/10/2021 16:15 | 3   |
| 04/10/2021 16:45 | 570 |
| 04/10/2021 17:15 | 448 |
| 04/10/2021 17:45 | 0   |
| 04/10/2021 18:15 | 153 |

---

|                  |     |
|------------------|-----|
| 04/10/2021 18:45 | 0   |
| 04/10/2021 19:15 | 0   |
| 04/10/2021 19:45 | 0   |
| 04/10/2021 20:15 | 0   |
| 04/10/2021 20:45 | 0   |
| 04/10/2021 21:15 | 0   |
| 04/10/2021 21:45 | 0   |
| 04/10/2021 22:15 | 0   |
| 04/10/2021 22:45 | 0   |
| 04/10/2021 23:15 | 0   |
| 04/10/2021 23:45 | 0   |
| 04/11/2021 00:15 | 0   |
| 04/11/2021 00:45 | 0   |
| 04/11/2021 01:15 | 0   |
| 04/11/2021 01:45 | 0   |
| 04/11/2021 02:15 | 0   |
| 04/11/2021 02:45 | 0   |
| 04/11/2021 03:15 | 0   |
| 04/11/2021 03:45 | 0   |
| 04/11/2021 04:15 | 0   |
| 04/11/2021 04:45 | 0   |
| 04/11/2021 05:15 | 0   |
| 04/11/2021 05:45 | 0   |
| 04/11/2021 06:15 | 0   |
| 04/11/2021 06:45 | 0   |
| 04/11/2021 07:15 | 128 |
| 04/11/2021 07:45 | 302 |
| 04/11/2021 08:15 | 392 |
| 04/11/2021 08:45 | 649 |
| 04/11/2021 09:15 | 705 |
| 04/11/2021 09:45 | 793 |

---

|                  |     |
|------------------|-----|
| 04/11/2021 10:15 | 825 |
| 04/11/2021 10:45 | 873 |
| 04/11/2021 11:15 | 867 |
| 04/11/2021 11:45 | 902 |
| 04/11/2021 12:15 | 926 |
| 04/11/2021 12:45 | 927 |
| 04/11/2021 13:15 | 924 |
| 04/11/2021 13:45 | 906 |
| 04/11/2021 14:15 | 868 |
| 04/11/2021 14:45 | 862 |
| 04/11/2021 15:15 | 785 |
| 04/11/2021 15:45 | 430 |
| 04/11/2021 16:15 | 79  |
| 04/11/2021 16:45 | 81  |
| 04/11/2021 17:15 | 41  |
| 04/11/2021 17:45 | 207 |
| 04/11/2021 18:15 | 0   |
| 04/11/2021 18:45 | 0   |
| 04/11/2021 19:15 | 0   |
| 04/11/2021 19:45 | 0   |
| 04/11/2021 20:15 | 0   |
| 04/11/2021 20:45 | 0   |
| 04/11/2021 21:15 | 0   |
| 04/11/2021 21:45 | 0   |
| 04/11/2021 22:15 | 0   |
| 04/11/2021 22:45 | 0   |
| 04/11/2021 23:15 | 0   |
| 04/11/2021 23:45 | 0   |
| 04/12/2021 00:15 | 0   |
| 04/12/2021 00:45 | 0   |
| 04/12/2021 01:15 | 0   |

---

|                  |     |
|------------------|-----|
| 04/12/2021 01:45 | 0   |
| 04/12/2021 02:15 | 0   |
| 04/12/2021 02:45 | 0   |
| 04/12/2021 03:15 | 0   |
| 04/12/2021 03:45 | 0   |
| 04/12/2021 04:15 | 0   |
| 04/12/2021 04:45 | 0   |
| 04/12/2021 05:15 | 0   |
| 04/12/2021 05:45 | 0   |
| 04/12/2021 06:15 | 0   |
| 04/12/2021 06:45 | 0   |
| 04/12/2021 07:15 | 371 |
| 04/12/2021 07:45 | 537 |
| 04/12/2021 08:15 | 670 |
| 04/12/2021 08:45 | 753 |
| 04/12/2021 09:15 | 812 |
| 04/12/2021 09:45 | 846 |
| 04/12/2021 10:15 | 880 |
| 04/12/2021 10:45 | 899 |
| 04/12/2021 11:15 | 913 |
| 04/12/2021 11:45 | 921 |
| 04/12/2021 12:15 | 926 |
| 04/12/2021 12:45 | 899 |
| 04/12/2021 13:15 | 774 |
| 04/12/2021 13:45 | 891 |
| 04/12/2021 14:15 | 907 |
| 04/12/2021 14:45 | 888 |
| 04/12/2021 15:15 | 863 |
| 04/12/2021 15:45 | 827 |
| 04/12/2021 16:15 | 789 |
| 04/12/2021 16:45 | 623 |

---

|                   |     |
|-------------------|-----|
| 04/12/2021 17:15  | 208 |
| 04/12/2021 17:45  | 314 |
| 04/12/2021 18:15  | 103 |
| 04/12/2021 18:45  | 0   |
| 04/12/2021 19:15  | 0   |
| 04/12/2021 19:45  | 0   |
| 04/12/2021 20:15  | 0   |
| 04/12/2021 20:45  | 0   |
| 04/12/2021 21:15  | 0   |
| 04/12/2021 21:45  | 0   |
| 04/12/2021 22:15  | 0   |
| 04/12/2021 22:45  | 0   |
| 04/12/2021 23:15  | 0   |
| 04/12/2021 23:45  | 0   |
| 4/13/2021 0:15:00 | 0   |
| 4/13/2021 0:45:00 | 0   |
| 4/13/2021 1:15:00 | 0   |
| 4/13/2021 1:45:00 | 0   |
| 4/13/2021 2:15:00 | 0   |
| 4/13/2021 2:45:00 | 0   |
| 4/13/2021 3:15:00 | 0   |
| 4/13/2021 3:45:00 | 0   |
| 4/13/2021 4:15:00 | 0   |
| 4/13/2021 4:45:00 | 0   |
| 4/13/2021 5:15:00 | 0   |
| 4/13/2021 5:45:00 | 0   |
| 4/13/2021 6:15:00 | 0   |
| 4/13/2021 6:45:00 | 63  |
| 4/13/2021 7:15:00 | 365 |
| 4/13/2021 7:45:00 | 586 |
| 4/13/2021 8:15:00 | 690 |

---

|                    |     |
|--------------------|-----|
| 4/13/2021 8:45:00  | 761 |
| 4/13/2021 9:15:00  | 813 |
| 4/13/2021 9:45:00  | 860 |
| 4/13/2021 10:15:00 | 880 |
| 4/13/2021 10:45:00 | 899 |
| 4/13/2021 11:15:00 | 912 |
| 4/13/2021 11:45:00 | 921 |
| 4/13/2021 12:15:00 | 926 |
| 4/13/2021 12:45:00 | 927 |
| 4/13/2021 13:15:00 | 924 |
| 4/13/2021 13:45:00 | 917 |
| 4/13/2021 14:15:00 | 906 |
| 4/13/2021 14:45:00 | 890 |
| 4/13/2021 15:15:00 | 868 |
| 4/13/2021 15:45:00 | 833 |
| 4/13/2021 16:15:00 | 788 |
| 4/13/2021 16:45:00 | 674 |
| 4/13/2021 17:15:00 | 338 |
| 4/13/2021 17:45:00 | 52  |
| 4/13/2021 18:15:00 | 134 |
| 4/13/2021 18:45:00 | 0   |
| 4/13/2021 19:15:00 | 0   |
| 4/13/2021 19:45:00 | 0   |
| 4/13/2021 20:15:00 | 0   |
| 4/13/2021 20:45:00 | 0   |
| 4/13/2021 21:15:00 | 0   |
| 4/13/2021 21:45:00 | 0   |
| 4/13/2021 22:15:00 | 0   |
| 4/13/2021 22:45:00 | 0   |
| 4/13/2021 23:15:00 | 0   |
| 4/13/2021 23:45:00 | 0   |

---

|                    |     |
|--------------------|-----|
| 4/14/2021 0:15:00  | 0   |
| 4/14/2021 0:45:00  | 0   |
| 4/14/2021 1:15:00  | 0   |
| 4/14/2021 1:45:00  | 0   |
| 4/14/2021 2:15:00  | 0   |
| 4/14/2021 2:45:00  | 0   |
| 4/14/2021 3:15:00  | 0   |
| 4/14/2021 3:45:00  | 0   |
| 4/14/2021 4:15:00  | 0   |
| 4/14/2021 4:45:00  | 0   |
| 4/14/2021 5:15:00  | 0   |
| 4/14/2021 5:45:00  | 0   |
| 4/14/2021 6:15:00  | 0   |
| 4/14/2021 6:45:00  | 85  |
| 4/14/2021 7:15:00  | 371 |
| 4/14/2021 7:45:00  | 533 |
| 4/14/2021 8:15:00  | 681 |
| 4/14/2021 8:45:00  | 757 |
| 4/14/2021 9:15:00  | 813 |
| 4/14/2021 9:45:00  | 860 |
| 4/14/2021 10:15:00 | 880 |
| 4/14/2021 10:45:00 | 899 |
| 4/14/2021 11:15:00 | 905 |
| 4/14/2021 11:45:00 | 908 |
| 4/14/2021 12:15:00 | 923 |
| 4/14/2021 12:45:00 | 926 |
| 4/14/2021 13:15:00 | 924 |
| 4/14/2021 13:45:00 | 917 |
| 4/14/2021 14:15:00 | 906 |
| 4/14/2021 14:45:00 | 890 |
| 4/14/2021 15:15:00 | 868 |

---

|                    |     |
|--------------------|-----|
| 4/14/2021 15:45:00 | 833 |
| 4/14/2021 16:15:00 | 684 |
| 4/14/2021 16:45:00 | 293 |
| 4/14/2021 17:15:00 | 321 |
| 4/14/2021 17:45:00 | 361 |
| 4/14/2021 18:15:00 | 0   |
| 4/14/2021 18:45:00 | 0   |
| 4/14/2021 19:15:00 | 0   |
| 4/14/2021 19:45:00 | 0   |
| 4/14/2021 20:15:00 | 0   |
| 4/14/2021 20:45:00 | 0   |
| 4/14/2021 21:15:00 | 0   |
| 4/14/2021 21:45:00 | 0   |
| 4/14/2021 22:15:00 | 0   |
| 4/14/2021 22:45:00 | 0   |
| 4/14/2021 23:15:00 | 0   |
| 4/14/2021 23:45:00 | 0   |
| 4/15/2021 0:15:00  | 0   |
| 4/15/2021 0:45:00  | 0   |
| 4/15/2021 1:15:00  | 0   |
| 4/15/2021 1:45:00  | 0   |
| 4/15/2021 2:15:00  | 0   |
| 4/15/2021 2:45:00  | 0   |
| 4/15/2021 3:15:00  | 0   |
| 4/15/2021 3:45:00  | 0   |
| 4/15/2021 4:15:00  | 0   |
| 4/15/2021 4:45:00  | 0   |
| 4/15/2021 5:15:00  | 0   |
| 4/15/2021 5:45:00  | 0   |
| 4/15/2021 6:15:00  | 0   |
| 4/15/2021 6:45:00  | 86  |

---



|                    |     |
|--------------------|-----|
| 4/15/2021 7:15:00  | 340 |
| 4/15/2021 7:45:00  | 585 |
| 4/15/2021 8:15:00  | 674 |
| 4/15/2021 8:45:00  | 742 |
| 4/15/2021 9:15:00  | 814 |
| 4/15/2021 9:45:00  | 840 |
| 4/15/2021 10:15:00 | 830 |
| 4/15/2021 10:45:00 | 876 |
| 4/15/2021 11:15:00 | 897 |
| 4/15/2021 11:45:00 | 890 |
| 4/15/2021 12:15:00 | 794 |
| 4/15/2021 12:45:00 | 140 |
| 4/15/2021 13:15:00 | 12  |
| 4/15/2021 13:45:00 | 1   |
| 4/15/2021 14:15:00 | 2   |
| 4/15/2021 14:45:00 | 10  |
| 4/15/2021 15:15:00 | 539 |
| 4/15/2021 15:45:00 | 557 |
| 4/15/2021 16:15:00 | 0   |
| 4/15/2021 16:45:00 | 0   |
| 4/15/2021 17:15:00 | 0   |
| 4/15/2021 17:45:00 | 0   |
| 4/15/2021 18:15:00 | 0   |
| 4/15/2021 18:45:00 | 0   |
| 4/15/2021 19:15:00 | 0   |
| 4/15/2021 19:45:00 | 0   |
| 4/15/2021 20:15:00 | 0   |
| 4/15/2021 20:45:00 | 0   |
| 4/15/2021 21:15:00 | 0   |
| 4/15/2021 21:45:00 | 0   |
| 4/15/2021 22:15:00 | 0   |

---

|                    |     |
|--------------------|-----|
| 4/15/2021 22:45:00 | 0   |
| 4/15/2021 23:15:00 | 0   |
| 4/15/2021 23:45:00 | 0   |
| 4/16/2021 0:15:00  | 0   |
| 4/16/2021 0:45:00  | 0   |
| 4/16/2021 1:15:00  | 0   |
| 4/16/2021 1:45:00  | 0   |
| 4/16/2021 2:15:00  | 0   |
| 4/16/2021 2:45:00  | 0   |
| 4/16/2021 3:15:00  | 0   |
| 4/16/2021 3:45:00  | 0   |
| 4/16/2021 4:15:00  | 0   |
| 4/16/2021 4:45:00  | 0   |
| 4/16/2021 5:15:00  | 0   |
| 4/16/2021 5:45:00  | 0   |
| 4/16/2021 6:15:00  | 0   |
| 4/16/2021 6:45:00  | 102 |
| 4/16/2021 7:15:00  | 324 |
| 4/16/2021 7:45:00  | 601 |
| 4/16/2021 8:15:00  | 694 |
| 4/16/2021 8:45:00  | 753 |
| 4/16/2021 9:15:00  | 815 |
| 4/16/2021 9:45:00  | 854 |
| 4/16/2021 10:15:00 | 880 |
| 4/16/2021 10:45:00 | 899 |
| 4/16/2021 11:15:00 | 898 |
| 4/16/2021 11:45:00 | 834 |
| 4/16/2021 12:15:00 | 907 |
| 4/16/2021 12:45:00 | 914 |
| 4/16/2021 13:15:00 | 919 |
| 4/16/2021 13:45:00 | 889 |

---

|                    |     |
|--------------------|-----|
| 4/16/2021 14:15:00 | 895 |
| 4/16/2021 14:45:00 | 889 |
| 4/16/2021 15:15:00 | 760 |
| 4/16/2021 15:45:00 | 428 |
| 4/16/2021 16:15:00 | 365 |
| 4/16/2021 16:45:00 | 107 |
| 4/16/2021 17:15:00 | 115 |
| 4/16/2021 17:45:00 | 0   |
| 4/16/2021 18:15:00 | 0   |
| 4/16/2021 18:45:00 | 0   |
| 4/16/2021 19:15:00 | 0   |
| 4/16/2021 19:45:00 | 0   |
| 4/16/2021 20:15:00 | 0   |
| 4/16/2021 20:45:00 | 0   |
| 4/16/2021 21:15:00 | 0   |
| 4/16/2021 21:45:00 | 0   |
| 4/16/2021 22:15:00 | 0   |
| 4/16/2021 22:45:00 | 0   |
| 4/16/2021 23:15:00 | 0   |
| 4/16/2021 23:45:00 | 0   |
| 4/17/2021 0:15:00  | 0   |
| 4/17/2021 0:45:00  | 0   |
| 4/17/2021 1:15:00  | 0   |
| 4/17/2021 1:45:00  | 0   |
| 4/17/2021 2:15:00  | 0   |
| 4/17/2021 2:45:00  | 0   |
| 4/17/2021 3:15:00  | 0   |
| 4/17/2021 3:45:00  | 0   |
| 4/17/2021 4:15:00  | 0   |
| 4/17/2021 4:45:00  | 0   |
| 4/17/2021 5:15:00  | 0   |

---

|                    |     |
|--------------------|-----|
| 4/17/2021 5:45:00  | 0   |
| 4/17/2021 6:15:00  | 0   |
| 4/17/2021 6:45:00  | 118 |
| 4/17/2021 7:15:00  | 404 |
| 4/17/2021 7:45:00  | 604 |
| 4/17/2021 8:15:00  | 695 |
| 4/17/2021 8:45:00  | 764 |
| 4/17/2021 9:15:00  | 815 |
| 4/17/2021 9:45:00  | 854 |
| 4/17/2021 10:15:00 | 880 |
| 4/17/2021 10:45:00 | 899 |
| 4/17/2021 11:15:00 | 875 |
| 4/17/2021 11:45:00 | 736 |
| 4/17/2021 12:15:00 | 633 |
| 4/17/2021 12:45:00 | 696 |
| 4/17/2021 13:15:00 | 455 |
| 4/17/2021 13:45:00 | 58  |
| 4/17/2021 14:15:00 | 732 |
| 4/17/2021 14:45:00 | 2   |
| 4/17/2021 15:15:00 | 0   |
| 4/17/2021 15:45:00 | 0   |
| 4/17/2021 16:15:00 | 0   |
| 4/17/2021 16:45:00 | 109 |
| 4/17/2021 17:15:00 | 0   |
| 4/17/2021 17:45:00 | 158 |
| 4/17/2021 18:15:00 | 0   |
| 4/17/2021 18:45:00 | 0   |
| 4/17/2021 19:15:00 | 0   |
| 4/17/2021 19:45:00 | 0   |
| 4/17/2021 20:15:00 | 0   |
| 4/17/2021 20:45:00 | 0   |

---

|                    |     |
|--------------------|-----|
| 4/17/2021 21:15:00 | 0   |
| 4/17/2021 21:45:00 | 0   |
| 4/17/2021 22:15:00 | 0   |
| 4/17/2021 22:45:00 | 0   |
| 4/17/2021 23:15:00 | 0   |
| 4/17/2021 23:45:00 | 0   |
| 4/18/2021 0:15:00  | 0   |
| 4/18/2021 0:45:00  | 0   |
| 4/18/2021 1:15:00  | 0   |
| 4/18/2021 1:45:00  | 0   |
| 4/18/2021 2:15:00  | 0   |
| 4/18/2021 2:45:00  | 0   |
| 4/18/2021 3:15:00  | 0   |
| 4/18/2021 3:45:00  | 0   |
| 4/18/2021 4:15:00  | 0   |
| 4/18/2021 4:45:00  | 0   |
| 4/18/2021 5:15:00  | 0   |
| 4/18/2021 5:45:00  | 0   |
| 4/18/2021 6:15:00  | 0   |
| 4/18/2021 6:45:00  | 110 |
| 4/18/2021 7:15:00  | 325 |
| 4/18/2021 7:45:00  | 606 |
| 4/18/2021 8:15:00  | 696 |
| 4/18/2021 8:45:00  | 765 |
| 4/18/2021 9:15:00  | 815 |
| 4/18/2021 9:45:00  | 854 |
| 4/18/2021 10:15:00 | 880 |
| 4/18/2021 10:45:00 | 899 |
| 4/18/2021 11:15:00 | 912 |
| 4/18/2021 11:45:00 | 918 |
| 4/18/2021 12:15:00 | 755 |

---

|                    |    |
|--------------------|----|
| 4/18/2021 12:45:00 | 11 |
| 4/18/2021 13:15:00 | 3  |
| 4/18/2021 13:45:00 | 2  |
| 4/18/2021 14:15:00 | 3  |
| 4/18/2021 14:45:00 | 6  |
| 4/18/2021 15:15:00 | 39 |
| 4/18/2021 15:45:00 | 7  |
| 4/18/2021 16:15:00 | 0  |
| 4/18/2021 16:45:00 | 0  |
| 4/18/2021 17:15:00 | 9  |
| 4/18/2021 17:45:00 | 0  |
| 4/18/2021 18:15:00 | 0  |
| 4/18/2021 18:45:00 | 0  |
| 4/18/2021 19:15:00 | 0  |
| 4/18/2021 19:45:00 | 0  |
| 4/18/2021 20:15:00 | 0  |
| 4/18/2021 20:45:00 | 0  |
| 4/18/2021 21:15:00 | 0  |
| 4/18/2021 21:45:00 | 0  |
| 4/18/2021 22:15:00 | 0  |
| 4/18/2021 22:45:00 | 0  |
| 4/18/2021 23:15:00 | 0  |
| 4/18/2021 23:45:00 | 0  |
| 4/19/2021 0:15:00  | 0  |
| 4/19/2021 0:45:00  | 0  |
| 4/19/2021 1:15:00  | 0  |
| 4/19/2021 1:45:00  | 0  |
| 4/19/2021 2:15:00  | 0  |
| 4/19/2021 2:45:00  | 0  |
| 4/19/2021 3:15:00  | 0  |
| 4/19/2021 3:45:00  | 0  |

---

|                    |     |
|--------------------|-----|
| 4/19/2021 4:15:00  | 0   |
| 4/19/2021 4:45:00  | 0   |
| 4/19/2021 5:15:00  | 0   |
| 4/19/2021 5:45:00  | 0   |
| 4/19/2021 6:15:00  | 0   |
| 4/19/2021 6:45:00  | 109 |
| 4/19/2021 7:15:00  | 329 |
| 4/19/2021 7:45:00  | 600 |
| 4/19/2021 8:15:00  | 697 |
| 4/19/2021 8:45:00  | 766 |
| 4/19/2021 9:15:00  | 816 |
| 4/19/2021 9:45:00  | 854 |
| 4/19/2021 10:15:00 | 880 |
| 4/19/2021 10:45:00 | 899 |
| 4/19/2021 11:15:00 | 911 |
| 4/19/2021 11:45:00 | 918 |
| 4/19/2021 12:15:00 | 907 |
| 4/19/2021 12:45:00 | 841 |
| 4/19/2021 13:15:00 | 708 |
| 4/19/2021 13:45:00 | 8   |
| 4/19/2021 14:15:00 | 2   |
| 4/19/2021 14:45:00 | 0   |
| 4/19/2021 15:15:00 | 0   |
| 4/19/2021 15:45:00 | 24  |
| 4/19/2021 16:15:00 | 0   |
| 4/19/2021 16:45:00 | 0   |
| 4/19/2021 17:15:00 | 56  |
| 4/19/2021 17:45:00 | 0   |
| 4/19/2021 18:15:00 | 137 |
| 4/19/2021 18:45:00 | 0   |
| 4/19/2021 19:15:00 | 0   |

---

|                    |     |
|--------------------|-----|
| 4/19/2021 19:45:00 | 0   |
| 4/19/2021 20:15:00 | 0   |
| 4/19/2021 20:45:00 | 0   |
| 4/19/2021 21:15:00 | 0   |
| 4/19/2021 21:45:00 | 0   |
| 4/19/2021 22:15:00 | 0   |
| 4/19/2021 22:45:00 | 0   |
| 4/19/2021 23:15:00 | 0   |
| 4/19/2021 23:45:00 | 0   |
| 4/20/2021 0:15:00  | 0   |
| 4/20/2021 0:45:00  | 0   |
| 4/20/2021 1:15:00  | 0   |
| 4/20/2021 1:45:00  | 0   |
| 4/20/2021 2:15:00  | 0   |
| 4/20/2021 2:45:00  | 0   |
| 4/20/2021 3:15:00  | 0   |
| 4/20/2021 3:45:00  | 0   |
| 4/20/2021 4:15:00  | 0   |
| 4/20/2021 4:45:00  | 0   |
| 4/20/2021 5:15:00  | 0   |
| 4/20/2021 5:45:00  | 0   |
| 4/20/2021 6:15:00  | 0   |
| 4/20/2021 6:45:00  | 118 |
| 4/20/2021 7:15:00  | 335 |
| 4/20/2021 7:45:00  | 611 |
| 4/20/2021 8:15:00  | 699 |
| 4/20/2021 8:45:00  | 767 |
| 4/20/2021 9:15:00  | 816 |
| 4/20/2021 9:45:00  | 855 |
| 4/20/2021 10:15:00 | 880 |
| 4/20/2021 10:45:00 | 899 |

---



|                    |     |
|--------------------|-----|
| 4/20/2021 11:15:00 | 911 |
| 4/20/2021 11:45:00 | 920 |
| 4/20/2021 12:15:00 | 924 |
| 4/20/2021 12:45:00 | 925 |
| 4/20/2021 13:15:00 | 919 |
| 4/20/2021 13:45:00 | 915 |
| 4/20/2021 14:15:00 | 802 |
| 4/20/2021 14:45:00 | 274 |
| 4/20/2021 15:15:00 | 0   |
| 4/20/2021 15:45:00 | 0   |
| 4/20/2021 16:15:00 | 0   |
| 4/20/2021 16:45:00 | 0   |
| 4/20/2021 17:15:00 | 0   |
| 4/20/2021 17:45:00 | 226 |
| 4/20/2021 18:15:00 | 0   |
| 4/20/2021 18:45:00 | 0   |
| 4/20/2021 19:15:00 | 0   |
| 4/20/2021 19:45:00 | 0   |
| 4/20/2021 20:15:00 | 0   |
| 4/20/2021 20:45:00 | 0   |
| 4/20/2021 21:15:00 | 0   |
| 4/20/2021 21:45:00 | 0   |
| 4/20/2021 22:15:00 | 0   |
| 4/20/2021 22:45:00 | 0   |
| 4/20/2021 23:15:00 | 0   |
| 4/20/2021 23:45:00 | 0   |
| 4/21/2021 0:15:00  | 0   |
| 4/21/2021 0:45:00  | 0   |
| 4/21/2021 1:15:00  | 0   |
| 4/21/2021 1:45:00  | 0   |
| 4/21/2021 2:15:00  | 0   |

---

|                    |     |
|--------------------|-----|
| 4/21/2021 2:45:00  | 0   |
| 4/21/2021 3:15:00  | 0   |
| 4/21/2021 3:45:00  | 0   |
| 4/21/2021 4:15:00  | 0   |
| 4/21/2021 4:45:00  | 0   |
| 4/21/2021 5:15:00  | 0   |
| 4/21/2021 5:45:00  | 0   |
| 4/21/2021 6:15:00  | 0   |
| 4/21/2021 6:45:00  | 134 |
| 4/21/2021 7:15:00  | 423 |
| 4/21/2021 7:45:00  | 613 |
| 4/21/2021 8:15:00  | 700 |
| 4/21/2021 8:45:00  | 768 |
| 4/21/2021 9:15:00  | 817 |
| 4/21/2021 9:45:00  | 855 |
| 4/21/2021 10:15:00 | 880 |
| 4/21/2021 10:45:00 | 898 |
| 4/21/2021 11:15:00 | 911 |
| 4/21/2021 11:45:00 | 919 |
| 4/21/2021 12:15:00 | 924 |
| 4/21/2021 12:45:00 | 924 |
| 4/21/2021 13:15:00 | 921 |
| 4/21/2021 13:45:00 | 915 |
| 4/21/2021 14:15:00 | 904 |
| 4/21/2021 14:45:00 | 888 |
| 4/21/2021 15:15:00 | 866 |
| 4/21/2021 15:45:00 | 832 |
| 4/21/2021 16:15:00 | 788 |
| 4/21/2021 16:45:00 | 727 |
| 4/21/2021 17:15:00 | 451 |
| 4/21/2021 17:45:00 | 0   |

---

|                    |     |
|--------------------|-----|
| 4/21/2021 18:15:00 | 156 |
| 4/21/2021 18:45:00 | 0   |
| 4/21/2021 19:15:00 | 0   |
| 4/21/2021 19:45:00 | 0   |
| 4/21/2021 20:15:00 | 0   |
| 4/21/2021 20:45:00 | 0   |
| 4/21/2021 21:15:00 | 0   |
| 4/21/2021 21:45:00 | 0   |
| 4/21/2021 22:15:00 | 0   |
| 4/21/2021 22:45:00 | 0   |
| 4/21/2021 23:15:00 | 0   |
| 4/21/2021 23:45:00 | 0   |
| 4/22/2021 0:15:00  | 0   |
| 4/22/2021 0:45:00  | 0   |
| 4/22/2021 1:15:00  | 0   |
| 4/22/2021 1:45:00  | 0   |
| 4/22/2021 2:15:00  | 0   |
| 4/22/2021 2:45:00  | 0   |
| 4/22/2021 3:15:00  | 0   |
| 4/22/2021 3:45:00  | 0   |
| 4/22/2021 4:15:00  | 0   |
| 4/22/2021 4:45:00  | 0   |
| 4/22/2021 5:15:00  | 0   |
| 4/22/2021 5:45:00  | 0   |
| 4/22/2021 6:15:00  | 0   |
| 4/22/2021 6:45:00  | 133 |
| 4/22/2021 7:15:00  | 407 |
| 4/22/2021 7:45:00  | 608 |
| 4/22/2021 8:15:00  | 701 |
| 4/22/2021 8:45:00  | 768 |
| 4/22/2021 9:15:00  | 817 |

---

|                    |     |
|--------------------|-----|
| 4/22/2021 9:45:00  | 855 |
| 4/22/2021 10:15:00 | 880 |
| 4/22/2021 10:45:00 | 898 |
| 4/22/2021 11:15:00 | 911 |
| 4/22/2021 11:45:00 | 919 |
| 4/22/2021 12:15:00 | 923 |
| 4/22/2021 12:45:00 | 924 |
| 4/22/2021 13:15:00 | 921 |
| 4/22/2021 13:45:00 | 914 |
| 4/22/2021 14:15:00 | 903 |
| 4/22/2021 14:45:00 | 887 |
| 4/22/2021 15:15:00 | 865 |
| 4/22/2021 15:45:00 | 832 |
| 4/22/2021 16:15:00 | 790 |
| 4/22/2021 16:45:00 | 727 |
| 4/22/2021 17:15:00 | 649 |
| 4/22/2021 17:45:00 | 388 |
| 4/22/2021 18:15:00 | 50  |
| 4/22/2021 18:45:00 | 0   |
| 4/22/2021 19:15:00 | 0   |
| 4/22/2021 19:45:00 | 0   |
| 4/22/2021 20:15:00 | 0   |
| 4/22/2021 20:45:00 | 0   |
| 4/22/2021 21:15:00 | 0   |
| 4/22/2021 21:45:00 | 0   |
| 4/22/2021 22:15:00 | 0   |
| 4/22/2021 22:45:00 | 0   |
| 4/22/2021 23:15:00 | 0   |
| 4/22/2021 23:45:00 | 0   |
| 4/23/2021 0:15:00  | 0   |
| 4/23/2021 0:45:00  | 0   |

---

|                    |     |
|--------------------|-----|
| 4/23/2021 1:15:00  | 0   |
| 4/23/2021 1:45:00  | 0   |
| 4/23/2021 2:15:00  | 0   |
| 4/23/2021 2:45:00  | 0   |
| 4/23/2021 3:15:00  | 0   |
| 4/23/2021 3:45:00  | 0   |
| 4/23/2021 4:15:00  | 0   |
| 4/23/2021 4:45:00  | 0   |
| 4/23/2021 5:15:00  | 0   |
| 4/23/2021 5:45:00  | 0   |
| 4/23/2021 6:15:00  | 0   |
| 4/23/2021 6:45:00  | 136 |
| 4/23/2021 7:15:00  | 421 |
| 4/23/2021 7:45:00  | 594 |
| 4/23/2021 8:15:00  | 690 |
| 4/23/2021 8:45:00  | 769 |
| 4/23/2021 9:15:00  | 817 |
| 4/23/2021 9:45:00  | 855 |
| 4/23/2021 10:15:00 | 880 |
| 4/23/2021 10:45:00 | 898 |
| 4/23/2021 11:15:00 | 911 |
| 4/23/2021 11:45:00 | 919 |
| 4/23/2021 12:15:00 | 915 |
| 4/23/2021 12:45:00 | 905 |
| 4/23/2021 13:15:00 | 894 |
| 4/23/2021 13:45:00 | 739 |
| 4/23/2021 14:15:00 | 422 |
| 4/23/2021 14:45:00 | 131 |
| 4/23/2021 15:15:00 | 716 |
| 4/23/2021 15:45:00 | 765 |
| 4/23/2021 16:15:00 | 615 |

---

|                    |     |
|--------------------|-----|
| 4/23/2021 16:45:00 | 674 |
| 4/23/2021 17:15:00 | 645 |
| 4/23/2021 17:45:00 | 464 |
| 4/23/2021 18:15:00 | 302 |
| 4/23/2021 18:45:00 | 0   |
| 4/23/2021 19:15:00 | 0   |
| 4/23/2021 19:45:00 | 0   |
| 4/23/2021 20:15:00 | 0   |
| 4/23/2021 20:45:00 | 0   |
| 4/23/2021 21:15:00 | 0   |
| 4/23/2021 21:45:00 | 0   |
| 4/23/2021 22:15:00 | 0   |
| 4/23/2021 22:45:00 | 0   |
| 4/23/2021 23:15:00 | 0   |
| 4/23/2021 23:45:00 | 0   |
| 4/24/2021 0:15:00  | 0   |
| 4/24/2021 0:45:00  | 0   |
| 4/24/2021 1:15:00  | 0   |
| 4/24/2021 1:45:00  | 0   |
| 4/24/2021 2:15:00  | 0   |
| 4/24/2021 2:45:00  | 0   |
| 4/24/2021 3:15:00  | 0   |
| 4/24/2021 3:45:00  | 0   |
| 4/24/2021 4:15:00  | 0   |
| 4/24/2021 4:45:00  | 0   |
| 4/24/2021 5:15:00  | 0   |
| 4/24/2021 5:45:00  | 0   |
| 4/24/2021 6:15:00  | 0   |
| 4/24/2021 6:45:00  | 117 |
| 4/24/2021 7:15:00  | 408 |
| 4/24/2021 7:45:00  | 553 |

---

|                    |     |
|--------------------|-----|
| 4/24/2021 8:15:00  | 691 |
| 4/24/2021 8:45:00  | 765 |
| 4/24/2021 9:15:00  | 813 |
| 4/24/2021 9:45:00  | 850 |
| 4/24/2021 10:15:00 | 857 |
| 4/24/2021 10:45:00 | 898 |
| 4/24/2021 11:15:00 | 895 |
| 4/24/2021 11:45:00 | 864 |
| 4/24/2021 12:15:00 | 907 |
| 4/24/2021 12:45:00 | 913 |
| 4/24/2021 13:15:00 | 893 |
| 4/24/2021 13:45:00 | 818 |
| 4/24/2021 14:15:00 | 647 |
| 4/24/2021 14:45:00 | 821 |
| 4/24/2021 15:15:00 | 716 |
| 4/24/2021 15:45:00 | 14  |
| 4/24/2021 16:15:00 | 0   |
| 4/24/2021 16:45:00 | 25  |
| 4/24/2021 17:15:00 | 0   |
| 4/24/2021 17:45:00 | 0   |
| 4/24/2021 18:15:00 | 0   |
| 4/24/2021 18:45:00 | 0   |
| 4/24/2021 19:15:00 | 0   |
| 4/24/2021 19:45:00 | 0   |
| 4/24/2021 20:15:00 | 0   |
| 4/24/2021 20:45:00 | 0   |
| 4/24/2021 21:15:00 | 0   |
| 4/24/2021 21:45:00 | 0   |
| 4/24/2021 22:15:00 | 0   |
| 4/24/2021 22:45:00 | 0   |
| 4/24/2021 23:15:00 | 0   |

---

|                    |     |
|--------------------|-----|
| 4/24/2021 23:45:00 | 0   |
| 4/25/2021 0:15:00  | 0   |
| 4/25/2021 0:45:00  | 0   |
| 4/25/2021 1:15:00  | 0   |
| 4/25/2021 1:45:00  | 0   |
| 4/25/2021 2:15:00  | 0   |
| 4/25/2021 2:45:00  | 0   |
| 4/25/2021 3:15:00  | 0   |
| 4/25/2021 3:45:00  | 0   |
| 4/25/2021 4:15:00  | 0   |
| 4/25/2021 4:45:00  | 0   |
| 4/25/2021 5:15:00  | 0   |
| 4/25/2021 5:45:00  | 0   |
| 4/25/2021 6:15:00  | 0   |
| 4/25/2021 6:45:00  | 41  |
| 4/25/2021 7:15:00  | 204 |
| 4/25/2021 7:45:00  | 398 |
| 4/25/2021 8:15:00  | 564 |
| 4/25/2021 8:45:00  | 670 |
| 4/25/2021 9:15:00  | 791 |
| 4/25/2021 9:45:00  | 843 |
| 4/25/2021 10:15:00 | 867 |
| 4/25/2021 10:45:00 | 827 |
| 4/25/2021 11:15:00 | 565 |
| 4/25/2021 11:45:00 | 618 |
| 4/25/2021 12:15:00 | 860 |
| 4/25/2021 12:45:00 | 886 |
| 4/25/2021 13:15:00 | 872 |
| 4/25/2021 13:45:00 | 769 |
| 4/25/2021 14:15:00 | 817 |
| 4/25/2021 14:45:00 | 873 |

---



|                    |     |
|--------------------|-----|
| 4/25/2021 15:15:00 | 834 |
| 4/25/2021 15:45:00 | 629 |
| 4/25/2021 16:15:00 | 104 |
| 4/25/2021 16:45:00 | 18  |
| 4/25/2021 17:15:00 | 452 |
| 4/25/2021 17:45:00 | 0   |
| 4/25/2021 18:15:00 | 37  |
| 4/25/2021 18:45:00 | 0   |
| 4/25/2021 19:15:00 | 0   |
| 4/25/2021 19:45:00 | 0   |
| 4/25/2021 20:15:00 | 0   |
| 4/25/2021 20:45:00 | 0   |
| 4/25/2021 21:15:00 | 0   |
| 4/25/2021 21:45:00 | 0   |
| 4/25/2021 22:15:00 | 0   |
| 4/25/2021 22:45:00 | 0   |
| 4/25/2021 23:15:00 | 0   |
| 4/25/2021 23:45:00 | 0   |
| 4/26/2021 0:15:00  | 0   |
| 4/26/2021 0:45:00  | 0   |
| 4/26/2021 1:15:00  | 0   |
| 4/26/2021 1:45:00  | 0   |
| 4/26/2021 2:15:00  | 0   |
| 4/26/2021 2:45:00  | 0   |
| 4/26/2021 3:15:00  | 0   |
| 4/26/2021 3:45:00  | 0   |
| 4/26/2021 4:15:00  | 0   |
| 4/26/2021 4:45:00  | 0   |
| 4/26/2021 5:15:00  | 0   |
| 4/26/2021 5:45:00  | 0   |
| 4/26/2021 6:15:00  | 0   |

---

|                    |     |
|--------------------|-----|
| 4/26/2021 6:45:00  | 30  |
| 4/26/2021 7:15:00  | 327 |
| 4/26/2021 7:45:00  | 307 |
| 4/26/2021 8:15:00  | 568 |
| 4/26/2021 8:45:00  | 750 |
| 4/26/2021 9:15:00  | 740 |
| 4/26/2021 9:45:00  | 823 |
| 4/26/2021 10:15:00 | 849 |
| 4/26/2021 10:45:00 | 885 |
| 4/26/2021 11:15:00 | 793 |
| 4/26/2021 11:45:00 | 466 |
| 4/26/2021 12:15:00 | 507 |
| 4/26/2021 12:45:00 | 295 |
| 4/26/2021 13:15:00 | 207 |
| 4/26/2021 13:45:00 | 299 |
| 4/26/2021 14:15:00 | 568 |
| 4/26/2021 14:45:00 | 124 |
| 4/26/2021 15:15:00 | 208 |
| 4/26/2021 15:45:00 | 31  |
| 4/26/2021 16:15:00 | 0   |
| 4/26/2021 16:45:00 | 476 |
| 4/26/2021 17:15:00 | 510 |
| 4/26/2021 17:45:00 | 223 |
| 4/26/2021 18:15:00 | 170 |
| 4/26/2021 18:45:00 | 0   |
| 4/26/2021 19:15:00 | 0   |
| 4/26/2021 19:45:00 | 0   |
| 4/26/2021 20:15:00 | 0   |
| 4/26/2021 20:45:00 | 0   |
| 4/26/2021 21:15:00 | 0   |
| 4/26/2021 21:45:00 | 0   |

---

|                    |     |
|--------------------|-----|
| 4/26/2021 22:15:00 | 0   |
| 4/26/2021 22:45:00 | 0   |
| 4/26/2021 23:15:00 | 0   |
| 4/26/2021 23:45:00 | 0   |
| 4/27/2021 0:15:00  | 0   |
| 4/27/2021 0:45:00  | 0   |
| 4/27/2021 1:15:00  | 0   |
| 4/27/2021 1:45:00  | 0   |
| 4/27/2021 2:15:00  | 0   |
| 4/27/2021 2:45:00  | 0   |
| 4/27/2021 3:15:00  | 0   |
| 4/27/2021 3:45:00  | 0   |
| 4/27/2021 4:15:00  | 0   |
| 4/27/2021 4:45:00  | 0   |
| 4/27/2021 5:15:00  | 0   |
| 4/27/2021 5:45:00  | 0   |
| 4/27/2021 6:15:00  | 0   |
| 4/27/2021 6:45:00  | 136 |
| 4/27/2021 7:15:00  | 356 |
| 4/27/2021 7:45:00  | 613 |
| 4/27/2021 8:15:00  | 706 |
| 4/27/2021 8:45:00  | 771 |
| 4/27/2021 9:15:00  | 818 |
| 4/27/2021 9:45:00  | 856 |
| 4/27/2021 10:15:00 | 880 |
| 4/27/2021 10:45:00 | 897 |
| 4/27/2021 11:15:00 | 910 |
| 4/27/2021 11:45:00 | 918 |
| 4/27/2021 12:15:00 | 922 |
| 4/27/2021 12:45:00 | 922 |
| 4/27/2021 13:15:00 | 919 |

---

|                    |     |
|--------------------|-----|
| 4/27/2021 13:45:00 | 912 |
| 4/27/2021 14:15:00 | 901 |
| 4/27/2021 14:45:00 | 886 |
| 4/27/2021 15:15:00 | 864 |
| 4/27/2021 15:45:00 | 831 |
| 4/27/2021 16:15:00 | 683 |
| 4/27/2021 16:45:00 | 272 |
| 4/27/2021 17:15:00 | 546 |
| 4/27/2021 17:45:00 | 520 |
| 4/27/2021 18:15:00 | 243 |
| 4/27/2021 18:45:00 | 0   |
| 4/27/2021 19:15:00 | 0   |
| 4/27/2021 19:45:00 | 0   |
| 4/27/2021 20:15:00 | 0   |
| 4/27/2021 20:45:00 | 0   |
| 4/27/2021 21:15:00 | 0   |
| 4/27/2021 21:45:00 | 0   |
| 4/27/2021 22:15:00 | 0   |
| 4/27/2021 22:45:00 | 0   |
| 4/27/2021 23:15:00 | 0   |
| 4/27/2021 23:45:00 | 0   |
| 4/28/2021 0:15:00  | 0   |
| 4/28/2021 0:45:00  | 0   |
| 4/28/2021 1:15:00  | 0   |
| 4/28/2021 1:45:00  | 0   |
| 4/28/2021 2:15:00  | 0   |
| 4/28/2021 2:45:00  | 0   |
| 4/28/2021 3:15:00  | 0   |
| 4/28/2021 3:45:00  | 0   |
| 4/28/2021 4:15:00  | 0   |
| 4/28/2021 4:45:00  | 0   |

---

|                    |     |
|--------------------|-----|
| 4/28/2021 5:15:00  | 0   |
| 4/28/2021 5:45:00  | 0   |
| 4/28/2021 6:15:00  | 0   |
| 4/28/2021 6:45:00  | 133 |
| 4/28/2021 7:15:00  | 406 |
| 4/28/2021 7:45:00  | 539 |
| 4/28/2021 8:15:00  | 686 |
| 4/28/2021 8:45:00  | 771 |
| 4/28/2021 9:15:00  | 814 |
| 4/28/2021 9:45:00  | 856 |
| 4/28/2021 10:15:00 | 873 |
| 4/28/2021 10:45:00 | 890 |
| 4/28/2021 11:15:00 | 909 |
| 4/28/2021 11:45:00 | 910 |
| 4/28/2021 12:15:00 | 921 |
| 4/28/2021 12:45:00 | 922 |
| 4/28/2021 13:15:00 | 919 |
| 4/28/2021 13:45:00 | 912 |
| 4/28/2021 14:15:00 | 901 |
| 4/28/2021 14:45:00 | 885 |
| 4/28/2021 15:15:00 | 864 |
| 4/28/2021 15:45:00 | 830 |
| 4/28/2021 16:15:00 | 790 |
| 4/28/2021 16:45:00 | 728 |
| 4/28/2021 17:15:00 | 650 |
| 4/28/2021 17:45:00 | 436 |
| 4/28/2021 18:15:00 | 202 |
| 4/28/2021 18:45:00 | 0   |
| 4/28/2021 19:15:00 | 0   |
| 4/28/2021 19:45:00 | 0   |
| 4/28/2021 20:15:00 | 0   |

---

|                    |     |
|--------------------|-----|
| 4/28/2021 20:45:00 | 0   |
| 4/28/2021 21:15:00 | 0   |
| 4/28/2021 21:45:00 | 0   |
| 4/28/2021 22:15:00 | 0   |
| 4/28/2021 22:45:00 | 0   |
| 4/28/2021 23:15:00 | 0   |
| 4/28/2021 23:45:00 | 0   |
| 4/29/2021 0:15:00  | 0   |
| 4/29/2021 0:45:00  | 0   |
| 4/29/2021 1:15:00  | 0   |
| 4/29/2021 1:45:00  | 0   |
| 4/29/2021 2:15:00  | 0   |
| 4/29/2021 2:45:00  | 0   |
| 4/29/2021 3:15:00  | 0   |
| 4/29/2021 3:45:00  | 0   |
| 4/29/2021 4:15:00  | 0   |
| 4/29/2021 4:45:00  | 0   |
| 4/29/2021 5:15:00  | 0   |
| 4/29/2021 5:45:00  | 0   |
| 4/29/2021 6:15:00  | 0   |
| 4/29/2021 6:45:00  | 129 |
| 4/29/2021 7:15:00  | 371 |
| 4/29/2021 7:45:00  | 570 |
| 4/29/2021 8:15:00  | 681 |
| 4/29/2021 8:45:00  | 772 |
| 4/29/2021 9:15:00  | 815 |
| 4/29/2021 9:45:00  | 856 |
| 4/29/2021 10:15:00 | 880 |
| 4/29/2021 10:45:00 | 897 |
| 4/29/2021 11:15:00 | 909 |
| 4/29/2021 11:45:00 | 917 |

---

|                    |     |
|--------------------|-----|
| 4/29/2021 12:15:00 | 921 |
| 4/29/2021 12:45:00 | 921 |
| 4/29/2021 13:15:00 | 918 |
| 4/29/2021 13:45:00 | 912 |
| 4/29/2021 14:15:00 | 901 |
| 4/29/2021 14:45:00 | 885 |
| 4/29/2021 15:15:00 | 821 |
| 4/29/2021 15:45:00 | 762 |
| 4/29/2021 16:15:00 | 706 |
| 4/29/2021 16:45:00 | 572 |
| 4/29/2021 17:15:00 | 88  |
| 4/29/2021 17:45:00 | 144 |
| 4/29/2021 18:15:00 | 94  |
| 4/29/2021 18:45:00 | 0   |
| 4/29/2021 19:15:00 | 0   |
| 4/29/2021 19:45:00 | 0   |
| 4/29/2021 20:15:00 | 0   |
| 4/29/2021 20:45:00 | 0   |
| 4/29/2021 21:15:00 | 0   |
| 4/29/2021 21:45:00 | 0   |
| 4/29/2021 22:15:00 | 0   |
| 4/29/2021 22:45:00 | 0   |
| 4/29/2021 23:15:00 | 0   |
| 4/29/2021 23:45:00 | 0   |
| 4/30/2021 0:15:00  | 0   |
| 4/30/2021 0:45:00  | 0   |
| 4/30/2021 1:15:00  | 0   |
| 4/30/2021 1:45:00  | 0   |
| 4/30/2021 2:15:00  | 0   |
| 4/30/2021 2:45:00  | 0   |
| 4/30/2021 3:15:00  | 0   |

---

|                    |     |
|--------------------|-----|
| 4/30/2021 3:45:00  | 0   |
| 4/30/2021 4:15:00  | 0   |
| 4/30/2021 4:45:00  | 0   |
| 4/30/2021 5:15:00  | 0   |
| 4/30/2021 5:45:00  | 0   |
| 4/30/2021 6:15:00  | 0   |
| 4/30/2021 6:45:00  | 144 |
| 4/30/2021 7:15:00  | 416 |
| 4/30/2021 7:45:00  | 573 |
| 4/30/2021 8:15:00  | 690 |
| 4/30/2021 8:45:00  | 758 |
| 4/30/2021 9:15:00  | 819 |
| 4/30/2021 9:45:00  | 856 |
| 4/30/2021 10:15:00 | 865 |
| 4/30/2021 10:45:00 | 897 |
| 4/30/2021 11:15:00 | 909 |
| 4/30/2021 11:45:00 | 917 |
| 4/30/2021 12:15:00 | 918 |
| 4/30/2021 12:45:00 | 907 |
| 4/30/2021 13:15:00 | 918 |
| 4/30/2021 13:45:00 | 856 |
| 4/30/2021 14:15:00 | 670 |
| 4/30/2021 14:45:00 | 532 |
| 4/30/2021 15:15:00 | 799 |
| 4/30/2021 15:45:00 | 711 |
| 4/30/2021 16:15:00 | 268 |
| 4/30/2021 16:45:00 | 5   |
| 4/30/2021 17:15:00 | 0   |
| 4/30/2021 17:45:00 | 39  |
| 4/30/2021 18:15:00 | 6   |
| 4/30/2021 18:45:00 | 5   |

---



|                    |     |
|--------------------|-----|
| 4/30/2021 19:15:00 | 0   |
| 4/30/2021 19:45:00 | 0   |
| 4/30/2021 20:15:00 | 0   |
| 4/30/2021 20:45:00 | 0   |
| 4/30/2021 21:15:00 | 0   |
| 4/30/2021 21:45:00 | 0   |
| 4/30/2021 22:15:00 | 0   |
| 4/30/2021 22:45:00 | 0   |
| 4/30/2021 23:15:00 | 0   |
| 4/30/2021 23:45:00 | 0   |
| 05/01/2021 00:15   | 0   |
| 05/01/2021 00:45   | 0   |
| 05/01/2021 01:15   | 0   |
| 05/01/2021 01:45   | 0   |
| 05/01/2021 02:15   | 0   |
| 05/01/2021 02:45   | 0   |
| 05/01/2021 03:15   | 0   |
| 05/01/2021 03:45   | 0   |
| 05/01/2021 04:15   | 0   |
| 05/01/2021 04:45   | 0   |
| 05/01/2021 05:15   | 0   |
| 05/01/2021 05:45   | 0   |
| 05/01/2021 06:15   | 0   |
| 05/01/2021 06:45   | 103 |
| 05/01/2021 07:15   | 372 |
| 05/01/2021 07:45   | 502 |
| 05/01/2021 08:15   | 633 |
| 05/01/2021 08:45   | 718 |
| 05/01/2021 09:15   | 765 |
| 05/01/2021 09:45   | 799 |
| 05/01/2021 10:15   | 824 |

---

|                  |     |
|------------------|-----|
| 05/01/2021 10:45 | 843 |
| 05/01/2021 11:15 | 855 |
| 05/01/2021 11:45 | 860 |
| 05/01/2021 12:15 | 867 |
| 05/01/2021 12:45 | 865 |
| 05/01/2021 13:15 | 860 |
| 05/01/2021 13:45 | 829 |
| 05/01/2021 14:15 | 832 |
| 05/01/2021 14:45 | 840 |
| 05/01/2021 15:15 | 763 |
| 05/01/2021 15:45 | 627 |
| 05/01/2021 16:15 | 276 |
| 05/01/2021 16:45 | 12  |
| 05/01/2021 17:15 | 62  |
| 05/01/2021 17:45 | 0   |
| 05/01/2021 18:15 | 0   |
| 05/01/2021 18:45 | 0   |
| 05/01/2021 19:15 | 0   |
| 05/01/2021 19:45 | 0   |
| 05/01/2021 20:15 | 0   |
| 05/01/2021 20:45 | 0   |
| 05/01/2021 21:15 | 0   |
| 05/01/2021 21:45 | 0   |
| 05/01/2021 22:15 | 0   |
| 05/01/2021 22:45 | 0   |
| 05/01/2021 23:15 | 0   |
| 05/01/2021 23:45 | 0   |
| 05/02/2021 00:15 | 0   |
| 05/02/2021 00:45 | 0   |
| 05/02/2021 01:15 | 0   |
| 05/02/2021 01:45 | 0   |

---

|                  |     |
|------------------|-----|
| 05/02/2021 02:15 | 0   |
| 05/02/2021 02:45 | 0   |
| 05/02/2021 03:15 | 0   |
| 05/02/2021 03:45 | 0   |
| 05/02/2021 04:15 | 0   |
| 05/02/2021 04:45 | 0   |
| 05/02/2021 05:15 | 0   |
| 05/02/2021 05:45 | 0   |
| 05/02/2021 06:15 | 0   |
| 05/02/2021 06:45 | 123 |
| 05/02/2021 07:15 | 387 |
| 05/02/2021 07:45 | 540 |
| 05/02/2021 08:15 | 649 |
| 05/02/2021 08:45 | 724 |
| 05/02/2021 09:15 | 774 |
| 05/02/2021 09:45 | 815 |
| 05/02/2021 10:15 | 824 |
| 05/02/2021 10:45 | 859 |
| 05/02/2021 11:15 | 864 |
| 05/02/2021 11:45 | 881 |
| 05/02/2021 12:15 | 867 |
| 05/02/2021 12:45 | 856 |
| 05/02/2021 13:15 | 791 |
| 05/02/2021 13:45 | 866 |
| 05/02/2021 14:15 | 810 |
| 05/02/2021 14:45 | 734 |
| 05/02/2021 15:15 | 570 |
| 05/02/2021 15:45 | 264 |
| 05/02/2021 16:15 | 0   |
| 05/02/2021 16:45 | 125 |
| 05/02/2021 17:15 | 2   |

---

|                  |    |
|------------------|----|
| 05/02/2021 17:45 | 0  |
| 05/02/2021 18:15 | 93 |
| 05/02/2021 18:45 | 13 |
| 05/02/2021 19:15 | 0  |
| 05/02/2021 19:45 | 0  |
| 05/02/2021 20:15 | 0  |
| 05/02/2021 20:45 | 0  |
| 05/02/2021 21:15 | 0  |
| 05/02/2021 21:45 | 0  |
| 05/02/2021 22:15 | 0  |
| 05/02/2021 22:45 | 0  |
| 05/02/2021 23:15 | 0  |
| 05/02/2021 23:45 | 0  |
| 05/03/2021 00:15 | 0  |
| 05/03/2021 00:45 | 0  |
| 05/03/2021 01:15 | 0  |
| 05/03/2021 01:45 | 0  |
| 05/03/2021 02:15 | 0  |
| 05/03/2021 02:45 | 0  |
| 05/03/2021 03:15 | 0  |
| 05/03/2021 03:45 | 0  |
| 05/03/2021 04:15 | 0  |
| 05/03/2021 04:45 | 0  |
| 05/03/2021 05:15 | 0  |
| 05/03/2021 05:45 | 0  |
| 05/03/2021 06:15 | 0  |
| 05/03/2021 06:45 | 32 |
| 05/03/2021 07:15 | 4  |
| 05/03/2021 07:45 | 7  |
| 05/03/2021 08:15 | 0  |
| 05/03/2021 08:45 | 0  |

---

|                  |     |
|------------------|-----|
| 05/03/2021 09:15 | 0   |
| 05/03/2021 09:45 | 0   |
| 05/03/2021 10:15 | 0   |
| 05/03/2021 10:45 | 0   |
| 05/03/2021 11:15 | 2   |
| 05/03/2021 11:45 | 29  |
| 05/03/2021 12:15 | 80  |
| 05/03/2021 12:45 | 273 |
| 05/03/2021 13:15 | 705 |
| 05/03/2021 13:45 | 779 |
| 05/03/2021 14:15 | 448 |
| 05/03/2021 14:45 | 123 |
| 05/03/2021 15:15 | 176 |
| 05/03/2021 15:45 | 317 |
| 05/03/2021 16:15 | 150 |
| 05/03/2021 16:45 | 435 |
| 05/03/2021 17:15 | 452 |
| 05/03/2021 17:45 | 68  |
| 05/03/2021 18:15 | 132 |
| 05/03/2021 18:45 | 11  |
| 05/03/2021 19:15 | 0   |
| 05/03/2021 19:45 | 0   |
| 05/03/2021 20:15 | 0   |
| 05/03/2021 20:45 | 0   |
| 05/03/2021 21:15 | 0   |
| 05/03/2021 21:45 | 0   |
| 05/03/2021 22:15 | 0   |
| 05/03/2021 22:45 | 0   |
| 05/03/2021 23:15 | 0   |
| 05/03/2021 23:45 | 0   |
| 05/04/2021 00:15 | 0   |

---

|                  |     |
|------------------|-----|
| 05/04/2021 00:45 | 0   |
| 05/04/2021 01:15 | 0   |
| 05/04/2021 01:45 | 0   |
| 05/04/2021 02:15 | 0   |
| 05/04/2021 02:45 | 0   |
| 05/04/2021 03:15 | 0   |
| 05/04/2021 03:45 | 0   |
| 05/04/2021 04:15 | 0   |
| 05/04/2021 04:45 | 0   |
| 05/04/2021 05:15 | 0   |
| 05/04/2021 05:45 | 0   |
| 05/04/2021 06:15 | 0   |
| 05/04/2021 06:45 | 0   |
| 05/04/2021 07:15 | 0   |
| 05/04/2021 07:45 | 104 |
| 05/04/2021 08:15 | 566 |
| 05/04/2021 08:45 | 720 |
| 05/04/2021 09:15 | 775 |
| 05/04/2021 09:45 | 799 |
| 05/04/2021 10:15 | 806 |
| 05/04/2021 10:45 | 859 |
| 05/04/2021 11:15 | 872 |
| 05/04/2021 11:45 | 860 |
| 05/04/2021 12:15 | 876 |
| 05/04/2021 12:45 | 814 |
| 05/04/2021 13:15 | 645 |
| 05/04/2021 13:45 | 846 |
| 05/04/2021 14:15 | 748 |
| 05/04/2021 14:45 | 114 |
| 05/04/2021 15:15 | 678 |
| 05/04/2021 15:45 | 449 |

---

|                  |     |
|------------------|-----|
| 05/04/2021 16:15 | 593 |
| 05/04/2021 16:45 | 624 |
| 05/04/2021 17:15 | 471 |
| 05/04/2021 17:45 | 342 |
| 05/04/2021 18:15 | 51  |
| 05/04/2021 18:45 | 24  |
| 05/04/2021 19:15 | 0   |
| 05/04/2021 19:45 | 0   |
| 05/04/2021 20:15 | 0   |
| 05/04/2021 20:45 | 0   |
| 05/04/2021 21:15 | 0   |
| 05/04/2021 21:45 | 0   |
| 05/04/2021 22:15 | 0   |
| 05/04/2021 22:45 | 0   |
| 05/04/2021 23:15 | 0   |
| 05/04/2021 23:45 | 0   |
| 05/05/2021 00:15 | 0   |
| 05/05/2021 00:45 | 0   |
| 05/05/2021 01:15 | 0   |
| 05/05/2021 01:45 | 0   |
| 05/05/2021 02:15 | 0   |
| 05/05/2021 02:45 | 0   |
| 05/05/2021 03:15 | 0   |
| 05/05/2021 03:45 | 0   |
| 05/05/2021 04:15 | 0   |
| 05/05/2021 04:45 | 0   |
| 05/05/2021 05:15 | 0   |
| 05/05/2021 05:45 | 0   |
| 05/05/2021 06:15 | 0   |
| 05/05/2021 06:45 | 129 |
| 05/05/2021 07:15 | 414 |

---

|                  |     |
|------------------|-----|
| 05/05/2021 07:45 | 525 |
| 05/05/2021 08:15 | 420 |
| 05/05/2021 08:45 | 574 |
| 05/05/2021 09:15 | 674 |
| 05/05/2021 09:45 | 778 |
| 05/05/2021 10:15 | 806 |
| 05/05/2021 10:45 | 860 |
| 05/05/2021 11:15 | 823 |
| 05/05/2021 11:45 | 723 |
| 05/05/2021 12:15 | 713 |
| 05/05/2021 12:45 | 486 |
| 05/05/2021 13:15 | 628 |
| 05/05/2021 13:45 | 493 |
| 05/05/2021 14:15 | 303 |
| 05/05/2021 14:45 | 1   |
| 05/05/2021 15:15 | 0   |
| 05/05/2021 15:45 | 0   |
| 05/05/2021 16:15 | 0   |
| 05/05/2021 16:45 | 0   |
| 05/05/2021 17:15 | 0   |
| 05/05/2021 17:45 | 31  |
| 05/05/2021 18:15 | 84  |
| 05/05/2021 18:45 | 0   |
| 05/05/2021 19:15 | 0   |
| 05/05/2021 19:45 | 0   |
| 05/05/2021 20:15 | 0   |
| 05/05/2021 20:45 | 0   |
| 05/05/2021 21:15 | 0   |
| 05/05/2021 21:45 | 0   |
| 05/05/2021 22:15 | 0   |
| 05/05/2021 22:45 | 0   |

---



|                  |     |
|------------------|-----|
| 05/05/2021 23:15 | 0   |
| 05/05/2021 23:45 | 0   |
| 05/06/2021 00:15 | 0   |
| 05/06/2021 00:45 | 0   |
| 05/06/2021 01:15 | 0   |
| 05/06/2021 01:45 | 0   |
| 05/06/2021 02:15 | 0   |
| 05/06/2021 02:45 | 0   |
| 05/06/2021 03:15 | 0   |
| 05/06/2021 03:45 | 0   |
| 05/06/2021 04:15 | 0   |
| 05/06/2021 04:45 | 0   |
| 05/06/2021 05:15 | 0   |
| 05/06/2021 05:45 | 0   |
| 05/06/2021 06:15 | 0   |
| 05/06/2021 06:45 | 194 |
| 05/06/2021 07:15 | 398 |
| 05/06/2021 07:45 | 577 |
| 05/06/2021 08:15 | 659 |
| 05/06/2021 08:45 | 726 |
| 05/06/2021 09:15 | 775 |
| 05/06/2021 09:45 | 814 |
| 05/06/2021 10:15 | 840 |
| 05/06/2021 10:45 | 842 |
| 05/06/2021 11:15 | 813 |
| 05/06/2021 11:45 | 751 |
| 05/06/2021 12:15 | 253 |
| 05/06/2021 12:45 | 132 |
| 05/06/2021 13:15 | 564 |
| 05/06/2021 13:45 | 325 |
| 05/06/2021 14:15 | 491 |

---

|                  |     |
|------------------|-----|
| 05/06/2021 14:45 | 326 |
| 05/06/2021 15:15 | 589 |
| 05/06/2021 15:45 | 726 |
| 05/06/2021 16:15 | 686 |
| 05/06/2021 16:45 | 358 |
| 05/06/2021 17:15 | 457 |
| 05/06/2021 17:45 | 110 |
| 05/06/2021 18:15 | 49  |
| 05/06/2021 18:45 | 0   |
| 05/06/2021 19:15 | 0   |
| 05/06/2021 19:45 | 0   |
| 05/06/2021 20:15 | 0   |
| 05/06/2021 20:45 | 0   |
| 05/06/2021 21:15 | 0   |
| 05/06/2021 21:45 | 0   |
| 05/06/2021 22:15 | 0   |
| 05/06/2021 22:45 | 0   |
| 05/06/2021 23:15 | 0   |
| 05/06/2021 23:45 | 0   |
| 05/07/2021 00:15 | 0   |
| 05/07/2021 00:45 | 0   |
| 05/07/2021 01:15 | 0   |
| 05/07/2021 01:45 | 0   |
| 05/07/2021 02:15 | 0   |
| 05/07/2021 02:45 | 0   |
| 05/07/2021 03:15 | 0   |
| 05/07/2021 03:45 | 0   |
| 05/07/2021 04:15 | 0   |
| 05/07/2021 04:45 | 0   |
| 05/07/2021 05:15 | 0   |
| 05/07/2021 05:45 | 0   |

---

|                  |     |
|------------------|-----|
| 05/07/2021 06:15 | 0   |
| 05/07/2021 06:45 | 153 |
| 05/07/2021 07:15 | 425 |
| 05/07/2021 07:45 | 574 |
| 05/07/2021 08:15 | 660 |
| 05/07/2021 08:45 | 726 |
| 05/07/2021 09:15 | 775 |
| 05/07/2021 09:45 | 814 |
| 05/07/2021 10:15 | 840 |
| 05/07/2021 10:45 | 860 |
| 05/07/2021 11:15 | 871 |
| 05/07/2021 11:45 | 860 |
| 05/07/2021 12:15 | 883 |
| 05/07/2021 12:45 | 884 |
| 05/07/2021 13:15 | 880 |
| 05/07/2021 13:45 | 808 |
| 05/07/2021 14:15 | 486 |
| 05/07/2021 14:45 | 791 |
| 05/07/2021 15:15 | 764 |
| 05/07/2021 15:45 | 531 |
| 05/07/2021 16:15 | 0   |
| 05/07/2021 16:45 | 0   |
| 05/07/2021 17:15 | 203 |
| 05/07/2021 17:45 | 236 |
| 05/07/2021 18:15 | 36  |
| 05/07/2021 18:45 | 28  |
| 05/07/2021 19:15 | 0   |
| 05/07/2021 19:45 | 0   |
| 05/07/2021 20:15 | 0   |
| 05/07/2021 20:45 | 0   |
| 05/07/2021 21:15 | 0   |

---

|                  |     |
|------------------|-----|
| 05/07/2021 21:45 | 0   |
| 05/07/2021 22:15 | 0   |
| 05/07/2021 22:45 | 0   |
| 05/07/2021 23:15 | 0   |
| 05/07/2021 23:45 | 0   |
| 05/08/2021 00:15 | 0   |
| 05/08/2021 00:45 | 0   |
| 05/08/2021 01:15 | 0   |
| 05/08/2021 01:45 | 0   |
| 05/08/2021 02:15 | 0   |
| 05/08/2021 02:45 | 0   |
| 05/08/2021 03:15 | 0   |
| 05/08/2021 03:45 | 0   |
| 05/08/2021 04:15 | 0   |
| 05/08/2021 04:45 | 0   |
| 05/08/2021 05:15 | 0   |
| 05/08/2021 05:45 | 0   |
| 05/08/2021 06:15 | 0   |
| 05/08/2021 06:45 | 173 |
| 05/08/2021 07:15 | 427 |
| 05/08/2021 07:45 | 574 |
| 05/08/2021 08:15 | 661 |
| 05/08/2021 08:45 | 726 |
| 05/08/2021 09:15 | 772 |
| 05/08/2021 09:45 | 813 |
| 05/08/2021 10:15 | 839 |
| 05/08/2021 10:45 | 860 |
| 05/08/2021 11:15 | 860 |
| 05/08/2021 11:45 | 860 |
| 05/08/2021 12:15 | 883 |
| 05/08/2021 12:45 | 883 |

---

|                  |     |
|------------------|-----|
| 05/08/2021 13:15 | 880 |
| 05/08/2021 13:45 | 873 |
| 05/08/2021 14:15 | 861 |
| 05/08/2021 14:45 | 831 |
| 05/08/2021 15:15 | 793 |
| 05/08/2021 15:45 | 785 |
| 05/08/2021 16:15 | 738 |
| 05/08/2021 16:45 | 677 |
| 05/08/2021 17:15 | 504 |
| 05/08/2021 17:45 | 223 |
| 05/08/2021 18:15 | 215 |
| 05/08/2021 18:45 | 41  |
| 05/08/2021 19:15 | 0   |
| 05/08/2021 19:45 | 0   |
| 05/08/2021 20:15 | 0   |
| 05/08/2021 20:45 | 0   |
| 05/08/2021 21:15 | 0   |
| 05/08/2021 21:45 | 0   |
| 05/08/2021 22:15 | 0   |
| 05/08/2021 22:45 | 0   |
| 05/08/2021 23:15 | 0   |
| 05/08/2021 23:45 | 0   |
| 05/09/2021 00:15 | 0   |
| 05/09/2021 00:45 | 0   |
| 05/09/2021 01:15 | 0   |
| 05/09/2021 01:45 | 0   |
| 05/09/2021 02:15 | 0   |
| 05/09/2021 02:45 | 0   |
| 05/09/2021 03:15 | 0   |
| 05/09/2021 03:45 | 0   |
| 05/09/2021 04:15 | 0   |

---

|                  |     |
|------------------|-----|
| 05/09/2021 04:45 | 0   |
| 05/09/2021 05:15 | 0   |
| 05/09/2021 05:45 | 0   |
| 05/09/2021 06:15 | 0   |
| 05/09/2021 06:45 | 144 |
| 05/09/2021 07:15 | 375 |
| 05/09/2021 07:45 | 538 |
| 05/09/2021 08:15 | 631 |
| 05/09/2021 08:45 | 694 |
| 05/09/2021 09:15 | 764 |
| 05/09/2021 09:45 | 797 |
| 05/09/2021 10:15 | 835 |
| 05/09/2021 10:45 | 852 |
| 05/09/2021 11:15 | 860 |
| 05/09/2021 11:45 | 878 |
| 05/09/2021 12:15 | 851 |
| 05/09/2021 12:45 | 867 |
| 05/09/2021 13:15 | 795 |
| 05/09/2021 13:45 | 230 |
| 05/09/2021 14:15 | 3   |
| 05/09/2021 14:45 | 0   |
| 05/09/2021 15:15 | 0   |
| 05/09/2021 15:45 | 0   |
| 05/09/2021 16:15 | 69  |
| 05/09/2021 16:45 | 0   |
| 05/09/2021 17:15 | 0   |
| 05/09/2021 17:45 | 4   |
| 05/09/2021 18:15 | 0   |
| 05/09/2021 18:45 | 0   |
| 05/09/2021 19:15 | 0   |
| 05/09/2021 19:45 | 0   |

---

|                  |     |
|------------------|-----|
| 05/09/2021 20:15 | 0   |
| 05/09/2021 20:45 | 0   |
| 05/09/2021 21:15 | 0   |
| 05/09/2021 21:45 | 0   |
| 05/09/2021 22:15 | 0   |
| 05/09/2021 22:45 | 0   |
| 05/09/2021 23:15 | 0   |
| 05/09/2021 23:45 | 0   |
| 05/10/2021 00:15 | 0   |
| 05/10/2021 00:45 | 0   |
| 05/10/2021 01:15 | 0   |
| 05/10/2021 01:45 | 0   |
| 05/10/2021 02:15 | 0   |
| 05/10/2021 02:45 | 0   |
| 05/10/2021 03:15 | 0   |
| 05/10/2021 03:45 | 0   |
| 05/10/2021 04:15 | 0   |
| 05/10/2021 04:45 | 0   |
| 05/10/2021 05:15 | 0   |
| 05/10/2021 05:45 | 0   |
| 05/10/2021 06:15 | 0   |
| 05/10/2021 06:45 | 165 |
| 05/10/2021 07:15 | 402 |
| 05/10/2021 07:45 | 550 |
| 05/10/2021 08:15 | 650 |
| 05/10/2021 08:45 | 726 |
| 05/10/2021 09:15 | 756 |
| 05/10/2021 09:45 | 788 |
| 05/10/2021 10:15 | 818 |
| 05/10/2021 10:45 | 825 |
| 05/10/2021 11:15 | 870 |

---

|                  |     |
|------------------|-----|
| 05/10/2021 11:45 | 878 |
| 05/10/2021 12:15 | 850 |
| 05/10/2021 12:45 | 791 |
| 05/10/2021 13:15 | 763 |
| 05/10/2021 13:45 | 844 |
| 05/10/2021 14:15 | 743 |
| 05/10/2021 14:45 | 489 |
| 05/10/2021 15:15 | 92  |
| 05/10/2021 15:45 | 50  |
| 05/10/2021 16:15 | 5   |
| 05/10/2021 16:45 | 1   |
| 05/10/2021 17:15 | 0   |
| 05/10/2021 17:45 | 0   |
| 05/10/2021 18:15 | 88  |
| 05/10/2021 18:45 | 0   |
| 05/10/2021 19:15 | 0   |
| 05/10/2021 19:45 | 0   |
| 05/10/2021 20:15 | 0   |
| 05/10/2021 20:45 | 0   |
| 05/10/2021 21:15 | 0   |
| 05/10/2021 21:45 | 0   |
| 05/10/2021 22:15 | 0   |
| 05/10/2021 22:45 | 0   |
| 05/10/2021 23:15 | 0   |
| 05/10/2021 23:45 | 0   |
| 05/11/2021 00:15 | 0   |
| 05/11/2021 00:45 | 0   |
| 05/11/2021 01:15 | 0   |
| 05/11/2021 01:45 | 0   |
| 05/11/2021 02:15 | 0   |
| 05/11/2021 02:45 | 0   |

---



|                  |     |
|------------------|-----|
| 05/11/2021 03:15 | 0   |
| 05/11/2021 03:45 | 0   |
| 05/11/2021 04:15 | 0   |
| 05/11/2021 04:45 | 0   |
| 05/11/2021 05:15 | 0   |
| 05/11/2021 05:45 | 0   |
| 05/11/2021 06:15 | 0   |
| 05/11/2021 06:45 | 134 |
| 05/11/2021 07:15 | 382 |
| 05/11/2021 07:45 | 522 |
| 05/11/2021 08:15 | 605 |
| 05/11/2021 08:45 | 693 |
| 05/11/2021 09:15 | 773 |
| 05/11/2021 09:45 | 788 |
| 05/11/2021 10:15 | 799 |
| 05/11/2021 10:45 | 825 |
| 05/11/2021 11:15 | 795 |
| 05/11/2021 11:45 | 824 |
| 05/11/2021 12:15 | 818 |
| 05/11/2021 12:45 | 686 |
| 05/11/2021 13:15 | 322 |
| 05/11/2021 13:45 | 6   |
| 05/11/2021 14:15 | 6   |
| 05/11/2021 14:45 | 4   |
| 05/11/2021 15:15 | 200 |
| 05/11/2021 15:45 | 0   |
| 05/11/2021 16:15 | 264 |
| 05/11/2021 16:45 | 0   |
| 05/11/2021 17:15 | 0   |
| 05/11/2021 17:45 | 38  |
| 05/11/2021 18:15 | 0   |

---

|                  |     |
|------------------|-----|
| 05/11/2021 18:45 | 0   |
| 05/11/2021 19:15 | 0   |
| 05/11/2021 19:45 | 0   |
| 05/11/2021 20:15 | 0   |
| 05/11/2021 20:45 | 0   |
| 05/11/2021 21:15 | 0   |
| 05/11/2021 21:45 | 0   |
| 05/11/2021 22:15 | 0   |
| 05/11/2021 22:45 | 0   |
| 05/11/2021 23:15 | 0   |
| 05/11/2021 23:45 | 0   |
| 05/12/2021 00:15 | 0   |
| 05/12/2021 00:45 | 0   |
| 05/12/2021 01:15 | 0   |
| 05/12/2021 01:45 | 0   |
| 05/12/2021 02:15 | 0   |
| 05/12/2021 02:45 | 0   |
| 05/12/2021 03:15 | 0   |
| 05/12/2021 03:45 | 0   |
| 05/12/2021 04:15 | 0   |
| 05/12/2021 04:45 | 0   |
| 05/12/2021 05:15 | 0   |
| 05/12/2021 05:45 | 0   |
| 05/12/2021 06:15 | 0   |
| 05/12/2021 06:45 | 147 |
| 05/12/2021 07:15 | 373 |
| 05/12/2021 07:45 | 526 |
| 05/12/2021 08:15 | 644 |
| 05/12/2021 08:45 | 696 |
| 05/12/2021 09:15 | 739 |
| 05/12/2021 09:45 | 778 |

---

|                   |     |
|-------------------|-----|
| 05/12/2021 10:15  | 799 |
| 05/12/2021 10:45  | 698 |
| 05/12/2021 11:15  | 681 |
| 05/12/2021 11:45  | 717 |
| 05/12/2021 12:15  | 659 |
| 05/12/2021 12:45  | 617 |
| 05/12/2021 13:15  | 183 |
| 05/12/2021 13:45  | 558 |
| 05/12/2021 14:15  | 21  |
| 05/12/2021 14:45  | 283 |
| 05/12/2021 15:15  | 336 |
| 05/12/2021 15:45  | 375 |
| 05/12/2021 16:15  | 155 |
| 05/12/2021 16:45  | 0   |
| 05/12/2021 17:15  | 3   |
| 05/12/2021 17:45  | 89  |
| 05/12/2021 18:15  | 0   |
| 05/12/2021 18:45  | 0   |
| 05/12/2021 19:15  | 0   |
| 05/12/2021 19:45  | 0   |
| 05/12/2021 20:15  | 0   |
| 05/12/2021 20:45  | 0   |
| 05/12/2021 21:15  | 0   |
| 05/12/2021 21:45  | 0   |
| 05/12/2021 22:15  | 0   |
| 05/12/2021 22:45  | 0   |
| 05/12/2021 23:15  | 0   |
| 05/12/2021 23:45  | 0   |
| 5/13/2021 0:15:00 | 0   |
| 5/13/2021 0:45:00 | 0   |
| 5/13/2021 1:15:00 | 0   |

---

|                    |     |
|--------------------|-----|
| 5/13/2021 1:45:00  | 0   |
| 5/13/2021 2:15:00  | 0   |
| 5/13/2021 2:45:00  | 0   |
| 5/13/2021 3:15:00  | 0   |
| 5/13/2021 3:45:00  | 0   |
| 5/13/2021 4:15:00  | 0   |
| 5/13/2021 4:45:00  | 0   |
| 5/13/2021 5:15:00  | 0   |
| 5/13/2021 5:45:00  | 0   |
| 5/13/2021 6:15:00  | 0   |
| 5/13/2021 6:45:00  | 139 |
| 5/13/2021 7:15:00  | 280 |
| 5/13/2021 7:45:00  | 493 |
| 5/13/2021 8:15:00  | 628 |
| 5/13/2021 8:45:00  | 724 |
| 5/13/2021 9:15:00  | 766 |
| 5/13/2021 9:45:00  | 814 |
| 5/13/2021 10:15:00 | 835 |
| 5/13/2021 10:45:00 | 856 |
| 5/13/2021 11:15:00 | 869 |
| 5/13/2021 11:45:00 | 877 |
| 5/13/2021 12:15:00 | 869 |
| 5/13/2021 12:45:00 | 860 |
| 5/13/2021 13:15:00 | 868 |
| 5/13/2021 13:45:00 | 846 |
| 5/13/2021 14:15:00 | 830 |
| 5/13/2021 14:45:00 | 783 |
| 5/13/2021 15:15:00 | 579 |
| 5/13/2021 15:45:00 | 325 |
| 5/13/2021 16:15:00 | 246 |
| 5/13/2021 16:45:00 | 288 |

---

|                    |     |
|--------------------|-----|
| 5/13/2021 17:15:00 | 118 |
| 5/13/2021 17:45:00 | 0   |
| 5/13/2021 18:15:00 | 120 |
| 5/13/2021 18:45:00 | 51  |
| 5/13/2021 19:15:00 | 0   |
| 5/13/2021 19:45:00 | 0   |
| 5/13/2021 20:15:00 | 0   |
| 5/13/2021 20:45:00 | 0   |
| 5/13/2021 21:15:00 | 0   |
| 5/13/2021 21:45:00 | 0   |
| 5/13/2021 22:15:00 | 0   |
| 5/13/2021 22:45:00 | 0   |
| 5/13/2021 23:15:00 | 0   |
| 5/13/2021 23:45:00 | 0   |
| 5/14/2021 0:15:00  | 0   |
| 5/14/2021 0:45:00  | 0   |
| 5/14/2021 1:15:00  | 0   |
| 5/14/2021 1:45:00  | 0   |
| 5/14/2021 2:15:00  | 0   |
| 5/14/2021 2:45:00  | 0   |
| 5/14/2021 3:15:00  | 0   |
| 5/14/2021 3:45:00  | 0   |
| 5/14/2021 4:15:00  | 0   |
| 5/14/2021 4:45:00  | 0   |
| 5/14/2021 5:15:00  | 0   |
| 5/14/2021 5:45:00  | 0   |
| 5/14/2021 6:15:00  | 0   |
| 5/14/2021 6:45:00  | 135 |
| 5/14/2021 7:15:00  | 353 |
| 5/14/2021 7:45:00  | 546 |
| 5/14/2021 8:15:00  | 616 |

---

|                    |     |
|--------------------|-----|
| 5/14/2021 8:45:00  | 675 |
| 5/14/2021 9:15:00  | 757 |
| 5/14/2021 9:45:00  | 797 |
| 5/14/2021 10:15:00 | 808 |
| 5/14/2021 10:45:00 | 834 |
| 5/14/2021 11:15:00 | 819 |
| 5/14/2021 11:45:00 | 823 |
| 5/14/2021 12:15:00 | 805 |
| 5/14/2021 12:45:00 | 776 |
| 5/14/2021 13:15:00 | 789 |
| 5/14/2021 13:45:00 | 546 |
| 5/14/2021 14:15:00 | 13  |
| 5/14/2021 14:45:00 | 1   |
| 5/14/2021 15:15:00 | 277 |
| 5/14/2021 15:45:00 | 0   |
| 5/14/2021 16:15:00 | 119 |
| 5/14/2021 16:45:00 | 0   |
| 5/14/2021 17:15:00 | 78  |
| 5/14/2021 17:45:00 | 361 |
| 5/14/2021 18:15:00 | 304 |
| 5/14/2021 18:45:00 | 51  |
| 5/14/2021 19:15:00 | 0   |
| 5/14/2021 19:45:00 | 0   |
| 5/14/2021 20:15:00 | 0   |
| 5/14/2021 20:45:00 | 0   |
| 5/14/2021 21:15:00 | 0   |
| 5/14/2021 21:45:00 | 0   |
| 5/14/2021 22:15:00 | 0   |
| 5/14/2021 22:45:00 | 0   |
| 5/14/2021 23:15:00 | 0   |
| 5/14/2021 23:45:00 | 0   |

---

|                    |     |
|--------------------|-----|
| 5/15/2021 0:15:00  | 0   |
| 5/15/2021 0:45:00  | 0   |
| 5/15/2021 1:15:00  | 0   |
| 5/15/2021 1:45:00  | 0   |
| 5/15/2021 2:15:00  | 0   |
| 5/15/2021 2:45:00  | 0   |
| 5/15/2021 3:15:00  | 0   |
| 5/15/2021 3:45:00  | 0   |
| 5/15/2021 4:15:00  | 0   |
| 5/15/2021 4:45:00  | 0   |
| 5/15/2021 5:15:00  | 0   |
| 5/15/2021 5:45:00  | 0   |
| 5/15/2021 6:15:00  | 0   |
| 5/15/2021 6:45:00  | 178 |
| 5/15/2021 7:15:00  | 381 |
| 5/15/2021 7:45:00  | 516 |
| 5/15/2021 8:15:00  | 630 |
| 5/15/2021 8:45:00  | 688 |
| 5/15/2021 9:15:00  | 730 |
| 5/15/2021 9:45:00  | 813 |
| 5/15/2021 10:15:00 | 818 |
| 5/15/2021 10:45:00 | 843 |
| 5/15/2021 11:15:00 | 819 |
| 5/15/2021 11:45:00 | 781 |
| 5/15/2021 12:15:00 | 572 |
| 5/15/2021 12:45:00 | 124 |
| 5/15/2021 13:15:00 | 370 |
| 5/15/2021 13:45:00 | 4   |
| 5/15/2021 14:15:00 | 1   |
| 5/15/2021 14:45:00 | 0   |
| 5/15/2021 15:15:00 | 0   |

---

|                    |     |
|--------------------|-----|
| 5/15/2021 15:45:00 | 0   |
| 5/15/2021 16:15:00 | 0   |
| 5/15/2021 16:45:00 | 61  |
| 5/15/2021 17:15:00 | 0   |
| 5/15/2021 17:45:00 | 0   |
| 5/15/2021 18:15:00 | 0   |
| 5/15/2021 18:45:00 | 2   |
| 5/15/2021 19:15:00 | 0   |
| 5/15/2021 19:45:00 | 0   |
| 5/15/2021 20:15:00 | 0   |
| 5/15/2021 20:45:00 | 0   |
| 5/15/2021 21:15:00 | 0   |
| 5/15/2021 21:45:00 | 0   |
| 5/15/2021 22:15:00 | 0   |
| 5/15/2021 22:45:00 | 0   |
| 5/15/2021 23:15:00 | 0   |
| 5/15/2021 23:45:00 | 0   |
| 5/16/2021 0:15:00  | 0   |
| 5/16/2021 0:45:00  | 0   |
| 5/16/2021 1:15:00  | 0   |
| 5/16/2021 1:45:00  | 0   |
| 5/16/2021 2:15:00  | 0   |
| 5/16/2021 2:45:00  | 0   |
| 5/16/2021 3:15:00  | 0   |
| 5/16/2021 3:45:00  | 0   |
| 5/16/2021 4:15:00  | 0   |
| 5/16/2021 4:45:00  | 0   |
| 5/16/2021 5:15:00  | 0   |
| 5/16/2021 5:45:00  | 0   |
| 5/16/2021 6:15:00  | 0   |
| 5/16/2021 6:45:00  | 111 |

---



|                    |     |
|--------------------|-----|
| 5/16/2021 7:15:00  | 335 |
| 5/16/2021 7:45:00  | 518 |
| 5/16/2021 8:15:00  | 621 |
| 5/16/2021 8:45:00  | 676 |
| 5/16/2021 9:15:00  | 746 |
| 5/16/2021 9:45:00  | 813 |
| 5/16/2021 10:15:00 | 826 |
| 5/16/2021 10:45:00 | 855 |
| 5/16/2021 11:15:00 | 860 |
| 5/16/2021 11:45:00 | 738 |
| 5/16/2021 12:15:00 | 13  |
| 5/16/2021 12:45:00 | 54  |
| 5/16/2021 13:15:00 | 732 |
| 5/16/2021 13:45:00 | 395 |
| 5/16/2021 14:15:00 | 457 |
| 5/16/2021 14:45:00 | 18  |
| 5/16/2021 15:15:00 | 287 |
| 5/16/2021 15:45:00 | 525 |
| 5/16/2021 16:15:00 | 0   |
| 5/16/2021 16:45:00 | 0   |
| 5/16/2021 17:15:00 | 0   |
| 5/16/2021 17:45:00 | 0   |
| 5/16/2021 18:15:00 | 0   |
| 5/16/2021 18:45:00 | 36  |
| 5/16/2021 19:15:00 | 0   |
| 5/16/2021 19:45:00 | 0   |
| 5/16/2021 20:15:00 | 0   |
| 5/16/2021 20:45:00 | 0   |
| 5/16/2021 21:15:00 | 0   |
| 5/16/2021 21:45:00 | 0   |
| 5/16/2021 22:15:00 | 0   |

---

|                    |     |
|--------------------|-----|
| 5/16/2021 22:45:00 | 0   |
| 5/16/2021 23:15:00 | 0   |
| 5/16/2021 23:45:00 | 0   |
| 5/17/2021 0:15:00  | 0   |
| 5/17/2021 0:45:00  | 0   |
| 5/17/2021 1:15:00  | 0   |
| 5/17/2021 1:45:00  | 0   |
| 5/17/2021 2:15:00  | 0   |
| 5/17/2021 2:45:00  | 0   |
| 5/17/2021 3:15:00  | 0   |
| 5/17/2021 3:45:00  | 0   |
| 5/17/2021 4:15:00  | 0   |
| 5/17/2021 4:45:00  | 0   |
| 5/17/2021 5:15:00  | 0   |
| 5/17/2021 5:45:00  | 0   |
| 5/17/2021 6:15:00  | 0   |
| 5/17/2021 6:45:00  | 168 |
| 5/17/2021 7:15:00  | 409 |
| 5/17/2021 7:45:00  | 560 |
| 5/17/2021 8:15:00  | 648 |
| 5/17/2021 8:45:00  | 727 |
| 5/17/2021 9:15:00  | 775 |
| 5/17/2021 9:45:00  | 813 |
| 5/17/2021 10:15:00 | 837 |
| 5/17/2021 10:45:00 | 855 |
| 5/17/2021 11:15:00 | 867 |
| 5/17/2021 11:45:00 | 780 |
| 5/17/2021 12:15:00 | 72  |
| 5/17/2021 12:45:00 | 760 |
| 5/17/2021 13:15:00 | 765 |
| 5/17/2021 13:45:00 | 711 |

---

|                    |     |
|--------------------|-----|
| 5/17/2021 14:15:00 | 146 |
| 5/17/2021 14:45:00 | 18  |
| 5/17/2021 15:15:00 | 0   |
| 5/17/2021 15:45:00 | 5   |
| 5/17/2021 16:15:00 | 0   |
| 5/17/2021 16:45:00 | 0   |
| 5/17/2021 17:15:00 | 0   |
| 5/17/2021 17:45:00 | 0   |
| 5/17/2021 18:15:00 | 21  |
| 5/17/2021 18:45:00 | 0   |
| 5/17/2021 19:15:00 | 0   |
| 5/17/2021 19:45:00 | 0   |
| 5/17/2021 20:15:00 | 0   |
| 5/17/2021 20:45:00 | 0   |
| 5/17/2021 21:15:00 | 0   |
| 5/17/2021 21:45:00 | 0   |
| 5/17/2021 22:15:00 | 0   |
| 5/17/2021 22:45:00 | 0   |
| 5/17/2021 23:15:00 | 0   |
| 5/17/2021 23:45:00 | 0   |
| 5/18/2021 0:15:00  | 0   |
| 5/18/2021 0:45:00  | 0   |
| 5/18/2021 1:15:00  | 0   |
| 5/18/2021 1:45:00  | 0   |
| 5/18/2021 2:15:00  | 0   |
| 5/18/2021 2:45:00  | 0   |
| 5/18/2021 3:15:00  | 0   |
| 5/18/2021 3:45:00  | 0   |
| 5/18/2021 4:15:00  | 0   |
| 5/18/2021 4:45:00  | 0   |
| 5/18/2021 5:15:00  | 0   |

---

|                    |     |
|--------------------|-----|
| 5/18/2021 5:45:00  | 0   |
| 5/18/2021 6:15:00  | 0   |
| 5/18/2021 6:45:00  | 162 |
| 5/18/2021 7:15:00  | 422 |
| 5/18/2021 7:45:00  | 561 |
| 5/18/2021 8:15:00  | 664 |
| 5/18/2021 8:45:00  | 718 |
| 5/18/2021 9:15:00  | 775 |
| 5/18/2021 9:45:00  | 812 |
| 5/18/2021 10:15:00 | 833 |
| 5/18/2021 10:45:00 | 850 |
| 5/18/2021 11:15:00 | 865 |
| 5/18/2021 11:45:00 | 875 |
| 5/18/2021 12:15:00 | 868 |
| 5/18/2021 12:45:00 | 821 |
| 5/18/2021 13:15:00 | 426 |
| 5/18/2021 13:45:00 | 158 |
| 5/18/2021 14:15:00 | 10  |
| 5/18/2021 14:45:00 | 0   |
| 5/18/2021 15:15:00 | 6   |
| 5/18/2021 15:45:00 | 540 |
| 5/18/2021 16:15:00 | 159 |
| 5/18/2021 16:45:00 | 0   |
| 5/18/2021 17:15:00 | 0   |
| 5/18/2021 17:45:00 | 113 |
| 5/18/2021 18:15:00 | 0   |
| 5/18/2021 18:45:00 | 0   |
| 5/18/2021 19:15:00 | 0   |
| 5/18/2021 19:45:00 | 0   |
| 5/18/2021 20:15:00 | 0   |
| 5/18/2021 20:45:00 | 0   |

---

|                    |     |
|--------------------|-----|
| 5/18/2021 21:15:00 | 0   |
| 5/18/2021 21:45:00 | 0   |
| 5/18/2021 22:15:00 | 0   |
| 5/18/2021 22:45:00 | 0   |
| 5/18/2021 23:15:00 | 0   |
| 5/18/2021 23:45:00 | 0   |
| 5/19/2021 0:15:00  | 0   |
| 5/19/2021 0:45:00  | 0   |
| 5/19/2021 1:15:00  | 0   |
| 5/19/2021 1:45:00  | 0   |
| 5/19/2021 2:15:00  | 0   |
| 5/19/2021 2:45:00  | 0   |
| 5/19/2021 3:15:00  | 0   |
| 5/19/2021 3:45:00  | 0   |
| 5/19/2021 4:15:00  | 0   |
| 5/19/2021 4:45:00  | 0   |
| 5/19/2021 5:15:00  | 0   |
| 5/19/2021 5:45:00  | 0   |
| 5/19/2021 6:15:00  | 0   |
| 5/19/2021 6:45:00  | 155 |
| 5/19/2021 7:15:00  | 389 |
| 5/19/2021 7:45:00  | 562 |
| 5/19/2021 8:15:00  | 649 |
| 5/19/2021 8:45:00  | 718 |
| 5/19/2021 9:15:00  | 774 |
| 5/19/2021 9:45:00  | 810 |
| 5/19/2021 10:15:00 | 836 |
| 5/19/2021 10:45:00 | 854 |
| 5/19/2021 11:15:00 | 865 |
| 5/19/2021 11:45:00 | 875 |
| 5/19/2021 12:15:00 | 876 |

---

|                    |     |
|--------------------|-----|
| 5/19/2021 12:45:00 | 839 |
| 5/19/2021 13:15:00 | 748 |
| 5/19/2021 13:45:00 | 595 |
| 5/19/2021 14:15:00 | 641 |
| 5/19/2021 14:45:00 | 48  |
| 5/19/2021 15:15:00 | 239 |
| 5/19/2021 15:45:00 | 185 |
| 5/19/2021 16:15:00 | 15  |
| 5/19/2021 16:45:00 | 29  |
| 5/19/2021 17:15:00 | 92  |
| 5/19/2021 17:45:00 | 376 |
| 5/19/2021 18:15:00 | 248 |
| 5/19/2021 18:45:00 | 38  |
| 5/19/2021 19:15:00 | 0   |
| 5/19/2021 19:45:00 | 0   |
| 5/19/2021 20:15:00 | 0   |
| 5/19/2021 20:45:00 | 0   |
| 5/19/2021 21:15:00 | 0   |
| 5/19/2021 21:45:00 | 0   |
| 5/19/2021 22:15:00 | 0   |
| 5/19/2021 22:45:00 | 0   |
| 5/19/2021 23:15:00 | 0   |
| 5/19/2021 23:45:00 | 0   |
| 5/20/2021 0:15:00  | 0   |
| 5/20/2021 0:45:00  | 0   |
| 5/20/2021 1:15:00  | 0   |
| 5/20/2021 1:45:00  | 0   |
| 5/20/2021 2:15:00  | 0   |
| 5/20/2021 2:45:00  | 0   |
| 5/20/2021 3:15:00  | 0   |
| 5/20/2021 3:45:00  | 0   |

---

|                    |     |
|--------------------|-----|
| 5/20/2021 4:15:00  | 0   |
| 5/20/2021 4:45:00  | 0   |
| 5/20/2021 5:15:00  | 0   |
| 5/20/2021 5:45:00  | 0   |
| 5/20/2021 6:15:00  | 0   |
| 5/20/2021 6:45:00  | 175 |
| 5/20/2021 7:15:00  | 426 |
| 5/20/2021 7:45:00  | 562 |
| 5/20/2021 8:15:00  | 642 |
| 5/20/2021 8:45:00  | 727 |
| 5/20/2021 9:15:00  | 774 |
| 5/20/2021 9:45:00  | 802 |
| 5/20/2021 10:15:00 | 836 |
| 5/20/2021 10:45:00 | 860 |
| 5/20/2021 11:15:00 | 863 |
| 5/20/2021 11:45:00 | 870 |
| 5/20/2021 12:15:00 | 860 |
| 5/20/2021 12:45:00 | 872 |
| 5/20/2021 13:15:00 | 829 |
| 5/20/2021 13:45:00 | 815 |
| 5/20/2021 14:15:00 | 757 |
| 5/20/2021 14:45:00 | 295 |
| 5/20/2021 15:15:00 | 162 |
| 5/20/2021 15:45:00 | 13  |
| 5/20/2021 16:15:00 | 0   |
| 5/20/2021 16:45:00 | 0   |
| 5/20/2021 17:15:00 | 0   |
| 5/20/2021 17:45:00 | 2   |
| 5/20/2021 18:15:00 | 0   |
| 5/20/2021 18:45:00 | 0   |
| 5/20/2021 19:15:00 | 0   |

---

|                    |     |
|--------------------|-----|
| 5/20/2021 19:45:00 | 0   |
| 5/20/2021 20:15:00 | 0   |
| 5/20/2021 20:45:00 | 0   |
| 5/20/2021 21:15:00 | 0   |
| 5/20/2021 21:45:00 | 0   |
| 5/20/2021 22:15:00 | 0   |
| 5/20/2021 22:45:00 | 0   |
| 5/20/2021 23:15:00 | 0   |
| 5/20/2021 23:45:00 | 0   |
| 5/21/2021 0:15:00  | 0   |
| 5/21/2021 0:45:00  | 0   |
| 5/21/2021 1:15:00  | 0   |
| 5/21/2021 1:45:00  | 0   |
| 5/21/2021 2:15:00  | 0   |
| 5/21/2021 2:45:00  | 0   |
| 5/21/2021 3:15:00  | 0   |
| 5/21/2021 3:45:00  | 0   |
| 5/21/2021 4:15:00  | 0   |
| 5/21/2021 4:45:00  | 0   |
| 5/21/2021 5:15:00  | 0   |
| 5/21/2021 5:45:00  | 0   |
| 5/21/2021 6:15:00  | 0   |
| 5/21/2021 6:45:00  | 210 |
| 5/21/2021 7:15:00  | 427 |
| 5/21/2021 7:45:00  | 563 |
| 5/21/2021 8:15:00  | 650 |
| 5/21/2021 8:45:00  | 718 |
| 5/21/2021 9:15:00  | 771 |
| 5/21/2021 9:45:00  | 812 |
| 5/21/2021 10:15:00 | 836 |
| 5/21/2021 10:45:00 | 854 |

---



|                    |     |
|--------------------|-----|
| 5/21/2021 11:15:00 | 863 |
| 5/21/2021 11:45:00 | 874 |
| 5/21/2021 12:15:00 | 860 |
| 5/21/2021 12:45:00 | 815 |
| 5/21/2021 13:15:00 | 701 |
| 5/21/2021 13:45:00 | 141 |
| 5/21/2021 14:15:00 | 200 |
| 5/21/2021 14:45:00 | 740 |
| 5/21/2021 15:15:00 | 683 |
| 5/21/2021 15:45:00 | 23  |
| 5/21/2021 16:15:00 | 8   |
| 5/21/2021 16:45:00 | 37  |
| 5/21/2021 17:15:00 | 423 |
| 5/21/2021 17:45:00 | 5   |
| 5/21/2021 18:15:00 | 155 |
| 5/21/2021 18:45:00 | 53  |
| 5/21/2021 19:15:00 | 0   |
| 5/21/2021 19:45:00 | 0   |
| 5/21/2021 20:15:00 | 0   |
| 5/21/2021 20:45:00 | 0   |
| 5/21/2021 21:15:00 | 0   |
| 5/21/2021 21:45:00 | 0   |
| 5/21/2021 22:15:00 | 0   |
| 5/21/2021 22:45:00 | 0   |
| 5/21/2021 23:15:00 | 0   |
| 5/21/2021 23:45:00 | 0   |
| 5/22/2021 0:15:00  | 0   |
| 5/22/2021 0:45:00  | 0   |
| 5/22/2021 1:15:00  | 0   |
| 5/22/2021 1:45:00  | 0   |
| 5/22/2021 2:15:00  | 0   |

---

|                    |     |
|--------------------|-----|
| 5/22/2021 2:45:00  | 0   |
| 5/22/2021 3:15:00  | 0   |
| 5/22/2021 3:45:00  | 0   |
| 5/22/2021 4:15:00  | 0   |
| 5/22/2021 4:45:00  | 0   |
| 5/22/2021 5:15:00  | 0   |
| 5/22/2021 5:45:00  | 0   |
| 5/22/2021 6:15:00  | 0   |
| 5/22/2021 6:45:00  | 170 |
| 5/22/2021 7:15:00  | 439 |
| 5/22/2021 7:45:00  | 580 |
| 5/22/2021 8:15:00  | 664 |
| 5/22/2021 8:45:00  | 726 |
| 5/22/2021 9:15:00  | 774 |
| 5/22/2021 9:45:00  | 811 |
| 5/22/2021 10:15:00 | 835 |
| 5/22/2021 10:45:00 | 860 |
| 5/22/2021 11:15:00 | 866 |
| 5/22/2021 11:45:00 | 874 |
| 5/22/2021 12:15:00 | 860 |
| 5/22/2021 12:45:00 | 795 |
| 5/22/2021 13:15:00 | 563 |
| 5/22/2021 13:45:00 | 102 |
| 5/22/2021 14:15:00 | 50  |
| 5/22/2021 14:45:00 | 259 |
| 5/22/2021 15:15:00 | 25  |
| 5/22/2021 15:45:00 | 30  |
| 5/22/2021 16:15:00 | 15  |
| 5/22/2021 16:45:00 | 473 |
| 5/22/2021 17:15:00 | 7   |
| 5/22/2021 17:45:00 | 20  |

---

|                    |     |
|--------------------|-----|
| 5/22/2021 18:15:00 | 52  |
| 5/22/2021 18:45:00 | 32  |
| 5/22/2021 19:15:00 | 0   |
| 5/22/2021 19:45:00 | 0   |
| 5/22/2021 20:15:00 | 0   |
| 5/22/2021 20:45:00 | 0   |
| 5/22/2021 21:15:00 | 0   |
| 5/22/2021 21:45:00 | 0   |
| 5/22/2021 22:15:00 | 0   |
| 5/22/2021 22:45:00 | 0   |
| 5/22/2021 23:15:00 | 0   |
| 5/22/2021 23:45:00 | 0   |
| 5/23/2021 0:15:00  | 0   |
| 5/23/2021 0:45:00  | 0   |
| 5/23/2021 1:15:00  | 0   |
| 5/23/2021 1:45:00  | 0   |
| 5/23/2021 2:15:00  | 0   |
| 5/23/2021 2:45:00  | 0   |
| 5/23/2021 3:15:00  | 0   |
| 5/23/2021 3:45:00  | 0   |
| 5/23/2021 4:15:00  | 0   |
| 5/23/2021 4:45:00  | 0   |
| 5/23/2021 5:15:00  | 0   |
| 5/23/2021 5:45:00  | 0   |
| 5/23/2021 6:15:00  | 0   |
| 5/23/2021 6:45:00  | 190 |
| 5/23/2021 7:15:00  | 430 |
| 5/23/2021 7:45:00  | 564 |
| 5/23/2021 8:15:00  | 648 |
| 5/23/2021 8:45:00  | 708 |
| 5/23/2021 9:15:00  | 768 |

---

|                    |     |
|--------------------|-----|
| 5/23/2021 9:45:00  | 811 |
| 5/23/2021 10:15:00 | 810 |
| 5/23/2021 10:45:00 | 860 |
| 5/23/2021 11:15:00 | 865 |
| 5/23/2021 11:45:00 | 866 |
| 5/23/2021 12:15:00 | 878 |
| 5/23/2021 12:45:00 | 872 |
| 5/23/2021 13:15:00 | 875 |
| 5/23/2021 13:45:00 | 868 |
| 5/23/2021 14:15:00 | 856 |
| 5/23/2021 14:45:00 | 840 |
| 5/23/2021 15:15:00 | 817 |
| 5/23/2021 15:45:00 | 761 |
| 5/23/2021 16:15:00 | 575 |
| 5/23/2021 16:45:00 | 193 |
| 5/23/2021 17:15:00 | 87  |
| 5/23/2021 17:45:00 | 0   |
| 5/23/2021 18:15:00 | 0   |
| 5/23/2021 18:45:00 | 0   |
| 5/23/2021 19:15:00 | 0   |
| 5/23/2021 19:45:00 | 0   |
| 5/23/2021 20:15:00 | 0   |
| 5/23/2021 20:45:00 | 0   |
| 5/23/2021 21:15:00 | 0   |
| 5/23/2021 21:45:00 | 0   |
| 5/23/2021 22:15:00 | 0   |
| 5/23/2021 22:45:00 | 0   |
| 5/23/2021 23:15:00 | 0   |
| 5/23/2021 23:45:00 | 0   |
| 5/24/2021 0:15:00  | 0   |
| 5/24/2021 0:45:00  | 0   |

---

|                    |     |
|--------------------|-----|
| 5/24/2021 1:15:00  | 0   |
| 5/24/2021 1:45:00  | 0   |
| 5/24/2021 2:15:00  | 0   |
| 5/24/2021 2:45:00  | 0   |
| 5/24/2021 3:15:00  | 0   |
| 5/24/2021 3:45:00  | 0   |
| 5/24/2021 4:15:00  | 0   |
| 5/24/2021 4:45:00  | 0   |
| 5/24/2021 5:15:00  | 0   |
| 5/24/2021 5:45:00  | 0   |
| 5/24/2021 6:15:00  | 0   |
| 5/24/2021 6:45:00  | 200 |
| 5/24/2021 7:15:00  | 425 |
| 5/24/2021 7:45:00  | 585 |
| 5/24/2021 8:15:00  | 664 |
| 5/24/2021 8:45:00  | 726 |
| 5/24/2021 9:15:00  | 773 |
| 5/24/2021 9:45:00  | 811 |
| 5/24/2021 10:15:00 | 835 |
| 5/24/2021 10:45:00 | 852 |
| 5/24/2021 11:15:00 | 865 |
| 5/24/2021 11:45:00 | 873 |
| 5/24/2021 12:15:00 | 877 |
| 5/24/2021 12:45:00 | 878 |
| 5/24/2021 13:15:00 | 874 |
| 5/24/2021 13:45:00 | 867 |
| 5/24/2021 14:15:00 | 856 |
| 5/24/2021 14:45:00 | 840 |
| 5/24/2021 15:15:00 | 817 |
| 5/24/2021 15:45:00 | 783 |
| 5/24/2021 16:15:00 | 739 |

---

|                    |     |
|--------------------|-----|
| 5/24/2021 16:45:00 | 680 |
| 5/24/2021 17:15:00 | 604 |
| 5/24/2021 17:45:00 | 469 |
| 5/24/2021 18:15:00 | 225 |
| 5/24/2021 18:45:00 | 70  |
| 5/24/2021 19:15:00 | 0   |
| 5/24/2021 19:45:00 | 0   |
| 5/24/2021 20:15:00 | 0   |
| 5/24/2021 20:45:00 | 0   |
| 5/24/2021 21:15:00 | 0   |
| 5/24/2021 21:45:00 | 0   |
| 5/24/2021 22:15:00 | 0   |
| 5/24/2021 22:45:00 | 0   |
| 5/24/2021 23:15:00 | 0   |
| 5/24/2021 23:45:00 | 0   |
| 5/25/2021 0:15:00  | 0   |
| 5/25/2021 0:45:00  | 0   |
| 5/25/2021 1:15:00  | 0   |
| 5/25/2021 1:45:00  | 0   |
| 5/25/2021 2:15:00  | 0   |
| 5/25/2021 2:45:00  | 0   |
| 5/25/2021 3:15:00  | 0   |
| 5/25/2021 3:45:00  | 0   |
| 5/25/2021 4:15:00  | 0   |
| 5/25/2021 4:45:00  | 0   |
| 5/25/2021 5:15:00  | 0   |
| 5/25/2021 5:45:00  | 0   |
| 5/25/2021 6:15:00  | 0   |
| 5/25/2021 6:45:00  | 177 |
| 5/25/2021 7:15:00  | 431 |
| 5/25/2021 7:45:00  | 554 |

---

|                    |     |
|--------------------|-----|
| 5/25/2021 8:15:00  | 700 |
| 5/25/2021 8:45:00  | 723 |
| 5/25/2021 9:15:00  | 771 |
| 5/25/2021 9:45:00  | 810 |
| 5/25/2021 10:15:00 | 833 |
| 5/25/2021 10:45:00 | 852 |
| 5/25/2021 11:15:00 | 865 |
| 5/25/2021 11:45:00 | 873 |
| 5/25/2021 12:15:00 | 877 |
| 5/25/2021 12:45:00 | 877 |
| 5/25/2021 13:15:00 | 874 |
| 5/25/2021 13:45:00 | 867 |
| 5/25/2021 14:15:00 | 856 |
| 5/25/2021 14:45:00 | 712 |
| 5/25/2021 15:15:00 | 138 |
| 5/25/2021 15:45:00 | 210 |
| 5/25/2021 16:15:00 | 49  |
| 5/25/2021 16:45:00 | 482 |
| 5/25/2021 17:15:00 | 331 |
| 5/25/2021 17:45:00 | 59  |
| 5/25/2021 18:15:00 | 2   |
| 5/25/2021 18:45:00 | 49  |
| 5/25/2021 19:15:00 | 0   |
| 5/25/2021 19:45:00 | 0   |
| 5/25/2021 20:15:00 | 0   |
| 5/25/2021 20:45:00 | 0   |
| 5/25/2021 21:15:00 | 0   |
| 5/25/2021 21:45:00 | 0   |
| 5/25/2021 22:15:00 | 0   |
| 5/25/2021 22:45:00 | 0   |
| 5/25/2021 23:15:00 | 0   |

---

|                    |     |
|--------------------|-----|
| 5/25/2021 23:45:00 | 0   |
| 5/26/2021 0:15:00  | 0   |
| 5/26/2021 0:45:00  | 0   |
| 5/26/2021 1:15:00  | 0   |
| 5/26/2021 1:45:00  | 0   |
| 5/26/2021 2:15:00  | 0   |
| 5/26/2021 2:45:00  | 0   |
| 5/26/2021 3:15:00  | 0   |
| 5/26/2021 3:45:00  | 0   |
| 5/26/2021 4:15:00  | 0   |
| 5/26/2021 4:45:00  | 0   |
| 5/26/2021 5:15:00  | 0   |
| 5/26/2021 5:45:00  | 0   |
| 5/26/2021 6:15:00  | 3   |
| 5/26/2021 6:45:00  | 179 |
| 5/26/2021 7:15:00  | 432 |
| 5/26/2021 7:45:00  | 564 |
| 5/26/2021 8:15:00  | 663 |
| 5/26/2021 8:45:00  | 715 |
| 5/26/2021 9:15:00  | 762 |
| 5/26/2021 9:45:00  | 810 |
| 5/26/2021 10:15:00 | 834 |
| 5/26/2021 10:45:00 | 833 |
| 5/26/2021 11:15:00 | 815 |
| 5/26/2021 11:45:00 | 850 |
| 5/26/2021 12:15:00 | 810 |
| 5/26/2021 12:45:00 | 564 |
| 5/26/2021 13:15:00 | 802 |
| 5/26/2021 13:45:00 | 820 |
| 5/26/2021 14:15:00 | 810 |
| 5/26/2021 14:45:00 | 735 |

---



|                    |     |
|--------------------|-----|
| 5/26/2021 15:15:00 | 553 |
| 5/26/2021 15:45:00 | 14  |
| 5/26/2021 16:15:00 | 0   |
| 5/26/2021 16:45:00 | 0   |
| 5/26/2021 17:15:00 | 114 |
| 5/26/2021 17:45:00 | 372 |
| 5/26/2021 18:15:00 | 141 |
| 5/26/2021 18:45:00 | 53  |
| 5/26/2021 19:15:00 | 0   |
| 5/26/2021 19:45:00 | 0   |
| 5/26/2021 20:15:00 | 0   |
| 5/26/2021 20:45:00 | 0   |
| 5/26/2021 21:15:00 | 0   |
| 5/26/2021 21:45:00 | 0   |
| 5/26/2021 22:15:00 | 0   |
| 5/26/2021 22:45:00 | 0   |
| 5/26/2021 23:15:00 | 0   |
| 5/26/2021 23:45:00 | 0   |
| 5/27/2021 0:15:00  | 0   |
| 5/27/2021 0:45:00  | 0   |
| 5/27/2021 1:15:00  | 0   |
| 5/27/2021 1:45:00  | 0   |
| 5/27/2021 2:15:00  | 0   |
| 5/27/2021 2:45:00  | 0   |
| 5/27/2021 3:15:00  | 0   |
| 5/27/2021 3:45:00  | 0   |
| 5/27/2021 4:15:00  | 0   |
| 5/27/2021 4:45:00  | 0   |
| 5/27/2021 5:15:00  | 0   |
| 5/27/2021 5:45:00  | 0   |
| 5/27/2021 6:15:00  | 10  |

---

|                    |     |
|--------------------|-----|
| 5/27/2021 6:45:00  | 214 |
| 5/27/2021 7:15:00  | 441 |
| 5/27/2021 7:45:00  | 585 |
| 5/27/2021 8:15:00  | 663 |
| 5/27/2021 8:45:00  | 725 |
| 5/27/2021 9:15:00  | 772 |
| 5/27/2021 9:45:00  | 810 |
| 5/27/2021 10:15:00 | 834 |
| 5/27/2021 10:45:00 | 851 |
| 5/27/2021 11:15:00 | 864 |
| 5/27/2021 11:45:00 | 872 |
| 5/27/2021 12:15:00 | 876 |
| 5/27/2021 12:45:00 | 877 |
| 5/27/2021 13:15:00 | 874 |
| 5/27/2021 13:45:00 | 866 |
| 5/27/2021 14:15:00 | 855 |
| 5/27/2021 14:45:00 | 839 |
| 5/27/2021 15:15:00 | 761 |
| 5/27/2021 15:45:00 | 523 |
| 5/27/2021 16:15:00 | 563 |
| 5/27/2021 16:45:00 | 542 |
| 5/27/2021 17:15:00 | 149 |
| 5/27/2021 17:45:00 | 0   |
| 5/27/2021 18:15:00 | 208 |
| 5/27/2021 18:45:00 | 80  |
| 5/27/2021 19:15:00 | 0   |
| 5/27/2021 19:45:00 | 0   |
| 5/27/2021 20:15:00 | 0   |
| 5/27/2021 20:45:00 | 0   |
| 5/27/2021 21:15:00 | 0   |
| 5/27/2021 21:45:00 | 0   |

---

|                    |     |
|--------------------|-----|
| 5/27/2021 22:15:00 | 0   |
| 5/27/2021 22:45:00 | 0   |
| 5/27/2021 23:15:00 | 0   |
| 5/27/2021 23:45:00 | 0   |
| 5/28/2021 0:15:00  | 0   |
| 5/28/2021 0:45:00  | 0   |
| 5/28/2021 1:15:00  | 0   |
| 5/28/2021 1:45:00  | 0   |
| 5/28/2021 2:15:00  | 0   |
| 5/28/2021 2:45:00  | 0   |
| 5/28/2021 3:15:00  | 0   |
| 5/28/2021 3:45:00  | 0   |
| 5/28/2021 4:15:00  | 0   |
| 5/28/2021 4:45:00  | 0   |
| 5/28/2021 5:15:00  | 0   |
| 5/28/2021 5:45:00  | 0   |
| 5/28/2021 6:15:00  | 11  |
| 5/28/2021 6:45:00  | 223 |
| 5/28/2021 7:15:00  | 451 |
| 5/28/2021 7:45:00  | 562 |
| 5/28/2021 8:15:00  | 700 |
| 5/28/2021 8:45:00  | 725 |
| 5/28/2021 9:15:00  | 772 |
| 5/28/2021 9:45:00  | 809 |
| 5/28/2021 10:15:00 | 833 |
| 5/28/2021 10:45:00 | 851 |
| 5/28/2021 11:15:00 | 864 |
| 5/28/2021 11:45:00 | 872 |
| 5/28/2021 12:15:00 | 876 |
| 5/28/2021 12:45:00 | 876 |
| 5/28/2021 13:15:00 | 873 |

---

|                    |     |
|--------------------|-----|
| 5/28/2021 13:45:00 | 866 |
| 5/28/2021 14:15:00 | 855 |
| 5/28/2021 14:45:00 | 839 |
| 5/28/2021 15:15:00 | 817 |
| 5/28/2021 15:45:00 | 783 |
| 5/28/2021 16:15:00 | 739 |
| 5/28/2021 16:45:00 | 637 |
| 5/28/2021 17:15:00 | 376 |
| 5/28/2021 17:45:00 | 0   |
| 5/28/2021 18:15:00 | 136 |
| 5/28/2021 18:45:00 | 33  |
| 5/28/2021 19:15:00 | 0   |
| 5/28/2021 19:45:00 | 0   |
| 5/28/2021 20:15:00 | 0   |
| 5/28/2021 20:45:00 | 0   |
| 5/28/2021 21:15:00 | 0   |
| 5/28/2021 21:45:00 | 0   |
| 5/28/2021 22:15:00 | 0   |
| 5/28/2021 22:45:00 | 0   |
| 5/28/2021 23:15:00 | 0   |
| 5/28/2021 23:45:00 | 0   |
| 5/29/2021 0:15:00  | 0   |
| 5/29/2021 0:45:00  | 0   |
| 5/29/2021 1:15:00  | 0   |
| 5/29/2021 1:45:00  | 0   |
| 5/29/2021 2:15:00  | 0   |
| 5/29/2021 2:45:00  | 0   |
| 5/29/2021 3:15:00  | 0   |
| 5/29/2021 3:45:00  | 0   |
| 5/29/2021 4:15:00  | 0   |
| 5/29/2021 4:45:00  | 0   |

---

|                    |     |
|--------------------|-----|
| 5/29/2021 5:15:00  | 0   |
| 5/29/2021 5:45:00  | 0   |
| 5/29/2021 6:15:00  | 0   |
| 5/29/2021 6:45:00  | 191 |
| 5/29/2021 7:15:00  | 425 |
| 5/29/2021 7:45:00  | 585 |
| 5/29/2021 8:15:00  | 663 |
| 5/29/2021 8:45:00  | 725 |
| 5/29/2021 9:15:00  | 772 |
| 5/29/2021 9:45:00  | 809 |
| 5/29/2021 10:15:00 | 833 |
| 5/29/2021 10:45:00 | 851 |
| 5/29/2021 11:15:00 | 863 |
| 5/29/2021 11:45:00 | 871 |
| 5/29/2021 12:15:00 | 876 |
| 5/29/2021 12:45:00 | 876 |
| 5/29/2021 13:15:00 | 873 |
| 5/29/2021 13:45:00 | 866 |
| 5/29/2021 14:15:00 | 855 |
| 5/29/2021 14:45:00 | 839 |
| 5/29/2021 15:15:00 | 816 |
| 5/29/2021 15:45:00 | 783 |
| 5/29/2021 16:15:00 | 739 |
| 5/29/2021 16:45:00 | 543 |
| 5/29/2021 17:15:00 | 58  |
| 5/29/2021 17:45:00 | 240 |
| 5/29/2021 18:15:00 | 114 |
| 5/29/2021 18:45:00 | 58  |
| 5/29/2021 19:15:00 | 0   |
| 5/29/2021 19:45:00 | 0   |
| 5/29/2021 20:15:00 | 0   |

---

|                    |     |
|--------------------|-----|
| 5/29/2021 20:45:00 | 0   |
| 5/29/2021 21:15:00 | 0   |
| 5/29/2021 21:45:00 | 0   |
| 5/29/2021 22:15:00 | 0   |
| 5/29/2021 22:45:00 | 0   |
| 5/29/2021 23:15:00 | 0   |
| 5/29/2021 23:45:00 | 0   |
| 5/30/2021 0:15:00  | 0   |
| 5/30/2021 0:45:00  | 0   |
| 5/30/2021 1:15:00  | 0   |
| 5/30/2021 1:45:00  | 0   |
| 5/30/2021 2:15:00  | 0   |
| 5/30/2021 2:45:00  | 0   |
| 5/30/2021 3:15:00  | 0   |
| 5/30/2021 3:45:00  | 0   |
| 5/30/2021 4:15:00  | 0   |
| 5/30/2021 4:45:00  | 0   |
| 5/30/2021 5:15:00  | 0   |
| 5/30/2021 5:45:00  | 0   |
| 5/30/2021 6:15:00  | 0   |
| 5/30/2021 6:45:00  | 164 |
| 5/30/2021 7:15:00  | 431 |
| 5/30/2021 7:45:00  | 542 |
| 5/30/2021 8:15:00  | 647 |
| 5/30/2021 8:45:00  | 722 |
| 5/30/2021 9:15:00  | 772 |
| 5/30/2021 9:45:00  | 809 |
| 5/30/2021 10:15:00 | 821 |
| 5/30/2021 10:45:00 | 844 |
| 5/30/2021 11:15:00 | 846 |
| 5/30/2021 11:45:00 | 871 |

---

|                    |     |
|--------------------|-----|
| 5/30/2021 12:15:00 | 860 |
| 5/30/2021 12:45:00 | 828 |
| 5/30/2021 13:15:00 | 824 |
| 5/30/2021 13:45:00 | 811 |
| 5/30/2021 14:15:00 | 753 |
| 5/30/2021 14:45:00 | 399 |
| 5/30/2021 15:15:00 | 552 |
| 5/30/2021 15:45:00 | 161 |
| 5/30/2021 16:15:00 | 14  |
| 5/30/2021 16:45:00 | 13  |
| 5/30/2021 17:15:00 | 0   |
| 5/30/2021 17:45:00 | 0   |
| 5/30/2021 18:15:00 | 39  |
| 5/30/2021 18:45:00 | 0   |
| 5/30/2021 19:15:00 | 0   |
| 5/30/2021 19:45:00 | 0   |
| 5/30/2021 20:15:00 | 0   |
| 5/30/2021 20:45:00 | 0   |
| 5/30/2021 21:15:00 | 0   |
| 5/30/2021 21:45:00 | 0   |
| 5/30/2021 22:15:00 | 0   |
| 5/30/2021 22:45:00 | 0   |
| 5/30/2021 23:15:00 | 0   |
| 5/30/2021 23:45:00 | 0   |
| 5/31/2021 0:15:00  | 0   |
| 5/31/2021 0:45:00  | 0   |
| 5/31/2021 1:15:00  | 0   |
| 5/31/2021 1:45:00  | 0   |
| 5/31/2021 2:15:00  | 0   |
| 5/31/2021 2:45:00  | 0   |
| 5/31/2021 3:15:00  | 0   |

---

|                    |     |
|--------------------|-----|
| 5/31/2021 3:45:00  | 0   |
| 5/31/2021 4:15:00  | 0   |
| 5/31/2021 4:45:00  | 0   |
| 5/31/2021 5:15:00  | 0   |
| 5/31/2021 5:45:00  | 0   |
| 5/31/2021 6:15:00  | 0   |
| 5/31/2021 6:45:00  | 0   |
| 5/31/2021 7:15:00  | 136 |
| 5/31/2021 7:45:00  | 62  |
| 5/31/2021 8:15:00  | 361 |
| 5/31/2021 8:45:00  | 462 |
| 5/31/2021 9:15:00  | 418 |
| 5/31/2021 9:45:00  | 154 |
| 5/31/2021 10:15:00 | 13  |
| 5/31/2021 10:45:00 | 259 |
| 5/31/2021 11:15:00 | 733 |
| 5/31/2021 11:45:00 | 571 |
| 5/31/2021 12:15:00 | 598 |
| 5/31/2021 12:45:00 | 540 |
| 5/31/2021 13:15:00 | 392 |
| 5/31/2021 13:45:00 | 434 |
| 5/31/2021 14:15:00 | 91  |
| 5/31/2021 14:45:00 | 144 |
| 5/31/2021 15:15:00 | 577 |
| 5/31/2021 15:45:00 | 636 |
| 5/31/2021 16:15:00 | 686 |
| 5/31/2021 16:45:00 | 559 |
| 5/31/2021 17:15:00 | 607 |
| 5/31/2021 17:45:00 | 418 |
| 5/31/2021 18:15:00 | 118 |
| 5/31/2021 18:45:00 | 31  |

---



|                    |     |
|--------------------|-----|
| 5/31/2021 19:15:00 | 0   |
| 5/31/2021 19:45:00 | 0   |
| 5/31/2021 20:15:00 | 0   |
| 5/31/2021 20:45:00 | 0   |
| 5/31/2021 21:15:00 | 0   |
| 5/31/2021 21:45:00 | 0   |
| 5/31/2021 22:15:00 | 0   |
| 5/31/2021 22:45:00 | 0   |
| 5/31/2021 23:15:00 | 0   |
| 5/31/2021 23:45:00 | 0   |
| 06/01/2021 00:15   | 0   |
| 06/01/2021 00:45   | 0   |
| 06/01/2021 01:15   | 0   |
| 06/01/2021 01:45   | 0   |
| 06/01/2021 02:15   | 0   |
| 06/01/2021 02:45   | 0   |
| 06/01/2021 03:15   | 0   |
| 06/01/2021 03:45   | 0   |
| 06/01/2021 04:15   | 0   |
| 06/01/2021 04:45   | 0   |
| 06/01/2021 05:15   | 0   |
| 06/01/2021 05:45   | 0   |
| 06/01/2021 06:15   | 0   |
| 06/01/2021 06:45   | 138 |
| 06/01/2021 07:15   | 11  |
| 06/01/2021 07:45   | 6   |
| 06/01/2021 08:15   | 190 |
| 06/01/2021 08:45   | 50  |
| 06/01/2021 09:15   | 6   |
| 06/01/2021 09:45   | 25  |
| 06/01/2021 10:15   | 161 |

---

|                  |     |
|------------------|-----|
| 06/01/2021 10:45 | 120 |
| 06/01/2021 11:15 | 7   |
| 06/01/2021 11:45 | 5   |
| 06/01/2021 12:15 | 32  |
| 06/01/2021 12:45 | 11  |
| 06/01/2021 13:15 | 295 |
| 06/01/2021 13:45 | 425 |
| 06/01/2021 14:15 | 32  |
| 06/01/2021 14:45 | 609 |
| 06/01/2021 15:15 | 122 |
| 06/01/2021 15:45 | 477 |
| 06/01/2021 16:15 | 516 |
| 06/01/2021 16:45 | 587 |
| 06/01/2021 17:15 | 553 |
| 06/01/2021 17:45 | 417 |
| 06/01/2021 18:15 | 273 |
| 06/01/2021 18:45 | 22  |
| 06/01/2021 19:15 | 0   |
| 06/01/2021 19:45 | 0   |
| 06/01/2021 20:15 | 0   |
| 06/01/2021 20:45 | 0   |
| 06/01/2021 21:15 | 0   |
| 06/01/2021 21:45 | 0   |
| 06/01/2021 22:15 | 0   |
| 06/01/2021 22:45 | 0   |
| 06/01/2021 23:15 | 0   |
| 06/01/2021 23:45 | 0   |
| 06/02/2021 00:15 | 0   |
| 06/02/2021 00:45 | 0   |
| 06/02/2021 01:15 | 0   |
| 06/02/2021 01:45 | 0   |

---

|                  |     |
|------------------|-----|
| 06/02/2021 02:15 | 0   |
| 06/02/2021 02:45 | 0   |
| 06/02/2021 03:15 | 0   |
| 06/02/2021 03:45 | 0   |
| 06/02/2021 04:15 | 0   |
| 06/02/2021 04:45 | 0   |
| 06/02/2021 05:15 | 0   |
| 06/02/2021 05:45 | 0   |
| 06/02/2021 06:15 | 0   |
| 06/02/2021 06:45 | 4   |
| 06/02/2021 07:15 | 49  |
| 06/02/2021 07:45 | 434 |
| 06/02/2021 08:15 | 668 |
| 06/02/2021 08:45 | 722 |
| 06/02/2021 09:15 | 773 |
| 06/02/2021 09:45 | 810 |
| 06/02/2021 10:15 | 833 |
| 06/02/2021 10:45 | 850 |
| 06/02/2021 11:15 | 862 |
| 06/02/2021 11:45 | 870 |
| 06/02/2021 12:15 | 874 |
| 06/02/2021 12:45 | 874 |
| 06/02/2021 13:15 | 871 |
| 06/02/2021 13:45 | 865 |
| 06/02/2021 14:15 | 854 |
| 06/02/2021 14:45 | 839 |
| 06/02/2021 15:15 | 818 |
| 06/02/2021 15:45 | 786 |
| 06/02/2021 16:15 | 743 |
| 06/02/2021 16:45 | 689 |
| 06/02/2021 17:15 | 594 |

---

|                  |     |
|------------------|-----|
| 06/02/2021 17:45 | 387 |
| 06/02/2021 18:15 | 35  |
| 06/02/2021 18:45 | 9   |
| 06/02/2021 19:15 | 0   |
| 06/02/2021 19:45 | 0   |
| 06/02/2021 20:15 | 0   |
| 06/02/2021 20:45 | 0   |
| 06/02/2021 21:15 | 0   |
| 06/02/2021 21:45 | 0   |
| 06/02/2021 22:15 | 0   |
| 06/02/2021 22:45 | 0   |
| 06/02/2021 23:15 | 0   |
| 06/02/2021 23:45 | 0   |
| 06/03/2021 00:15 | 0   |
| 06/03/2021 00:45 | 0   |
| 06/03/2021 01:15 | 0   |
| 06/03/2021 01:45 | 0   |
| 06/03/2021 02:15 | 0   |
| 06/03/2021 02:45 | 0   |
| 06/03/2021 03:15 | 0   |
| 06/03/2021 03:45 | 0   |
| 06/03/2021 04:15 | 0   |
| 06/03/2021 04:45 | 0   |
| 06/03/2021 05:15 | 0   |
| 06/03/2021 05:45 | 0   |
| 06/03/2021 06:15 | 0   |
| 06/03/2021 06:45 | 102 |
| 06/03/2021 07:15 | 395 |
| 06/03/2021 07:45 | 579 |
| 06/03/2021 08:15 | 668 |
| 06/03/2021 08:45 | 721 |

---

|                  |     |
|------------------|-----|
| 06/03/2021 09:15 | 772 |
| 06/03/2021 09:45 | 809 |
| 06/03/2021 10:15 | 832 |
| 06/03/2021 10:45 | 849 |
| 06/03/2021 11:15 | 862 |
| 06/03/2021 11:45 | 869 |
| 06/03/2021 12:15 | 850 |
| 06/03/2021 12:45 | 874 |
| 06/03/2021 13:15 | 871 |
| 06/03/2021 13:45 | 865 |
| 06/03/2021 14:15 | 854 |
| 06/03/2021 14:45 | 839 |
| 06/03/2021 15:15 | 818 |
| 06/03/2021 15:45 | 786 |
| 06/03/2021 16:15 | 743 |
| 06/03/2021 16:45 | 689 |
| 06/03/2021 17:15 | 617 |
| 06/03/2021 17:45 | 490 |
| 06/03/2021 18:15 | 224 |
| 06/03/2021 18:45 | 41  |
| 06/03/2021 19:15 | 0   |
| 06/03/2021 19:45 | 0   |
| 06/03/2021 20:15 | 0   |
| 06/03/2021 20:45 | 0   |
| 06/03/2021 21:15 | 0   |
| 06/03/2021 21:45 | 0   |
| 06/03/2021 22:15 | 0   |
| 06/03/2021 22:45 | 0   |
| 06/03/2021 23:15 | 0   |
| 06/03/2021 23:45 | 0   |
| 06/04/2021 00:15 | 0   |

---

|                  |     |
|------------------|-----|
| 06/04/2021 00:45 | 0   |
| 06/04/2021 01:15 | 0   |
| 06/04/2021 01:45 | 0   |
| 06/04/2021 02:15 | 0   |
| 06/04/2021 02:45 | 0   |
| 06/04/2021 03:15 | 0   |
| 06/04/2021 03:45 | 0   |
| 06/04/2021 04:15 | 0   |
| 06/04/2021 04:45 | 0   |
| 06/04/2021 05:15 | 0   |
| 06/04/2021 05:45 | 0   |
| 06/04/2021 06:15 | 0   |
| 06/04/2021 06:45 | 168 |
| 06/04/2021 07:15 | 377 |
| 06/04/2021 07:45 | 579 |
| 06/04/2021 08:15 | 667 |
| 06/04/2021 08:45 | 692 |
| 06/04/2021 09:15 | 769 |
| 06/04/2021 09:45 | 773 |
| 06/04/2021 10:15 | 826 |
| 06/04/2021 10:45 | 833 |
| 06/04/2021 11:15 | 861 |
| 06/04/2021 11:45 | 869 |
| 06/04/2021 12:15 | 873 |
| 06/04/2021 12:45 | 874 |
| 06/04/2021 13:15 | 862 |
| 06/04/2021 13:45 | 864 |
| 06/04/2021 14:15 | 848 |
| 06/04/2021 14:45 | 838 |
| 06/04/2021 15:15 | 814 |
| 06/04/2021 15:45 | 768 |

---

|                  |     |
|------------------|-----|
| 06/04/2021 16:15 | 744 |
| 06/04/2021 16:45 | 690 |
| 06/04/2021 17:15 | 617 |
| 06/04/2021 17:45 | 484 |
| 06/04/2021 18:15 | 220 |
| 06/04/2021 18:45 | 40  |
| 06/04/2021 19:15 | 0   |
| 06/04/2021 19:45 | 0   |
| 06/04/2021 20:15 | 0   |
| 06/04/2021 20:45 | 0   |
| 06/04/2021 21:15 | 0   |
| 06/04/2021 21:45 | 0   |
| 06/04/2021 22:15 | 0   |
| 06/04/2021 22:45 | 0   |
| 06/04/2021 23:15 | 0   |
| 06/04/2021 23:45 | 0   |
| 06/05/2021 00:15 | 0   |
| 06/05/2021 00:45 | 0   |
| 06/05/2021 01:15 | 0   |
| 06/05/2021 01:45 | 0   |
| 06/05/2021 02:15 | 0   |
| 06/05/2021 02:45 | 0   |
| 06/05/2021 03:15 | 0   |
| 06/05/2021 03:45 | 0   |
| 06/05/2021 04:15 | 0   |
| 06/05/2021 04:45 | 0   |
| 06/05/2021 05:15 | 0   |
| 06/05/2021 05:45 | 0   |
| 06/05/2021 06:15 | 16  |
| 06/05/2021 06:45 | 207 |
| 06/05/2021 07:15 | 300 |

---

|                  |     |
|------------------|-----|
| 06/05/2021 07:45 | 12  |
| 06/05/2021 08:15 | 0   |
| 06/05/2021 08:45 | 222 |
| 06/05/2021 09:15 | 321 |
| 06/05/2021 09:45 | 487 |
| 06/05/2021 10:15 | 5   |
| 06/05/2021 10:45 | 3   |
| 06/05/2021 11:15 | 321 |
| 06/05/2021 11:45 | 297 |
| 06/05/2021 12:15 | 32  |
| 06/05/2021 12:45 | 689 |
| 06/05/2021 13:15 | 664 |
| 06/05/2021 13:45 | 759 |
| 06/05/2021 14:15 | 717 |
| 06/05/2021 14:45 | 572 |
| 06/05/2021 15:15 | 89  |
| 06/05/2021 15:45 | 0   |
| 06/05/2021 16:15 | 44  |
| 06/05/2021 16:45 | 0   |
| 06/05/2021 17:15 | 0   |
| 06/05/2021 17:45 | 15  |
| 06/05/2021 18:15 | 0   |
| 06/05/2021 18:45 | 0   |
| 06/05/2021 19:15 | 0   |
| 06/05/2021 19:45 | 0   |
| 06/05/2021 20:15 | 0   |
| 06/05/2021 20:45 | 0   |
| 06/05/2021 21:15 | 0   |
| 06/05/2021 21:45 | 0   |
| 06/05/2021 22:15 | 0   |
| 06/05/2021 22:45 | 0   |

---



|                  |     |
|------------------|-----|
| 06/05/2021 23:15 | 0   |
| 06/05/2021 23:45 | 0   |
| 06/06/2021 00:15 | 0   |
| 06/06/2021 00:45 | 0   |
| 06/06/2021 01:15 | 0   |
| 06/06/2021 01:45 | 0   |
| 06/06/2021 02:15 | 0   |
| 06/06/2021 02:45 | 0   |
| 06/06/2021 03:15 | 0   |
| 06/06/2021 03:45 | 0   |
| 06/06/2021 04:15 | 0   |
| 06/06/2021 04:45 | 0   |
| 06/06/2021 05:15 | 0   |
| 06/06/2021 05:45 | 0   |
| 06/06/2021 06:15 | 0   |
| 06/06/2021 06:45 | 12  |
| 06/06/2021 07:15 | 0   |
| 06/06/2021 07:45 | 29  |
| 06/06/2021 08:15 | 359 |
| 06/06/2021 08:45 | 539 |
| 06/06/2021 09:15 | 293 |
| 06/06/2021 09:45 | 721 |
| 06/06/2021 10:15 | 831 |
| 06/06/2021 10:45 | 768 |
| 06/06/2021 11:15 | 851 |
| 06/06/2021 11:45 | 852 |
| 06/06/2021 12:15 | 873 |
| 06/06/2021 12:45 | 873 |
| 06/06/2021 13:15 | 871 |
| 06/06/2021 13:45 | 847 |
| 06/06/2021 14:15 | 852 |

---

|                  |     |
|------------------|-----|
| 06/06/2021 14:45 | 829 |
| 06/06/2021 15:15 | 721 |
| 06/06/2021 15:45 | 214 |
| 06/06/2021 16:15 | 586 |
| 06/06/2021 16:45 | 644 |
| 06/06/2021 17:15 | 535 |
| 06/06/2021 17:45 | 326 |
| 06/06/2021 18:15 | 44  |
| 06/06/2021 18:45 | 0   |
| 06/06/2021 19:15 | 0   |
| 06/06/2021 19:45 | 0   |
| 06/06/2021 20:15 | 0   |
| 06/06/2021 20:45 | 0   |
| 06/06/2021 21:15 | 0   |
| 06/06/2021 21:45 | 0   |
| 06/06/2021 22:15 | 0   |
| 06/06/2021 22:45 | 0   |
| 06/06/2021 23:15 | 0   |
| 06/06/2021 23:45 | 0   |
| 06/07/2021 00:15 | 0   |
| 06/07/2021 00:45 | 0   |
| 06/07/2021 01:15 | 0   |
| 06/07/2021 01:45 | 0   |
| 06/07/2021 02:15 | 0   |
| 06/07/2021 02:45 | 0   |
| 06/07/2021 03:15 | 0   |
| 06/07/2021 03:45 | 0   |
| 06/07/2021 04:15 | 0   |
| 06/07/2021 04:45 | 0   |
| 06/07/2021 05:15 | 0   |
| 06/07/2021 05:45 | 0   |

---

|                  |     |
|------------------|-----|
| 06/07/2021 06:15 | 10  |
| 06/07/2021 06:45 | 202 |
| 06/07/2021 07:15 | 436 |
| 06/07/2021 07:45 | 586 |
| 06/07/2021 08:15 | 666 |
| 06/07/2021 08:45 | 726 |
| 06/07/2021 09:15 | 771 |
| 06/07/2021 09:45 | 808 |
| 06/07/2021 10:15 | 831 |
| 06/07/2021 10:45 | 848 |
| 06/07/2021 11:15 | 859 |
| 06/07/2021 11:45 | 868 |
| 06/07/2021 12:15 | 873 |
| 06/07/2021 12:45 | 873 |
| 06/07/2021 13:15 | 870 |
| 06/07/2021 13:45 | 854 |
| 06/07/2021 14:15 | 852 |
| 06/07/2021 14:45 | 829 |
| 06/07/2021 15:15 | 814 |
| 06/07/2021 15:45 | 783 |
| 06/07/2021 16:15 | 727 |
| 06/07/2021 16:45 | 679 |
| 06/07/2021 17:15 | 577 |
| 06/07/2021 17:45 | 521 |
| 06/07/2021 18:15 | 257 |
| 06/07/2021 18:45 | 63  |
| 06/07/2021 19:15 | 0   |
| 06/07/2021 19:45 | 0   |
| 06/07/2021 20:15 | 0   |
| 06/07/2021 20:45 | 0   |
| 06/07/2021 21:15 | 0   |

---

|                  |     |
|------------------|-----|
| 06/07/2021 21:45 | 0   |
| 06/07/2021 22:15 | 0   |
| 06/07/2021 22:45 | 0   |
| 06/07/2021 23:15 | 0   |
| 06/07/2021 23:45 | 0   |
| 06/08/2021 00:15 | 0   |
| 06/08/2021 00:45 | 0   |
| 06/08/2021 01:15 | 0   |
| 06/08/2021 01:45 | 0   |
| 06/08/2021 02:15 | 0   |
| 06/08/2021 02:45 | 0   |
| 06/08/2021 03:15 | 0   |
| 06/08/2021 03:45 | 0   |
| 06/08/2021 04:15 | 0   |
| 06/08/2021 04:45 | 0   |
| 06/08/2021 05:15 | 0   |
| 06/08/2021 05:45 | 0   |
| 06/08/2021 06:15 | 0   |
| 06/08/2021 06:45 | 238 |
| 06/08/2021 07:15 | 461 |
| 06/08/2021 07:45 | 591 |
| 06/08/2021 08:15 | 666 |
| 06/08/2021 08:45 | 718 |
| 06/08/2021 09:15 | 770 |
| 06/08/2021 09:45 | 799 |
| 06/08/2021 10:15 | 831 |
| 06/08/2021 10:45 | 842 |
| 06/08/2021 11:15 | 860 |
| 06/08/2021 11:45 | 868 |
| 06/08/2021 12:15 | 843 |
| 06/08/2021 12:45 | 873 |

---

|                  |     |
|------------------|-----|
| 06/08/2021 13:15 | 806 |
| 06/08/2021 13:45 | 774 |
| 06/08/2021 14:15 | 621 |
| 06/08/2021 14:45 | 31  |
| 06/08/2021 15:15 | 49  |
| 06/08/2021 15:45 | 52  |
| 06/08/2021 16:15 | 456 |
| 06/08/2021 16:45 | 408 |
| 06/08/2021 17:15 | 32  |
| 06/08/2021 17:45 | 256 |
| 06/08/2021 18:15 | 84  |
| 06/08/2021 18:45 | 10  |
| 06/08/2021 19:15 | 0   |
| 06/08/2021 19:45 | 0   |
| 06/08/2021 20:15 | 0   |
| 06/08/2021 20:45 | 0   |
| 06/08/2021 21:15 | 0   |
| 06/08/2021 21:45 | 0   |
| 06/08/2021 22:15 | 0   |
| 06/08/2021 22:45 | 0   |
| 06/08/2021 23:15 | 0   |
| 06/08/2021 23:45 | 0   |
| 06/09/2021 00:15 | 0   |
| 06/09/2021 00:45 | 0   |
| 06/09/2021 01:15 | 0   |
| 06/09/2021 01:45 | 0   |
| 06/09/2021 02:15 | 0   |
| 06/09/2021 02:45 | 0   |
| 06/09/2021 03:15 | 0   |
| 06/09/2021 03:45 | 0   |
| 06/09/2021 04:15 | 0   |

---

|                  |     |
|------------------|-----|
| 06/09/2021 04:45 | 0   |
| 06/09/2021 05:15 | 0   |
| 06/09/2021 05:45 | 0   |
| 06/09/2021 06:15 | 11  |
| 06/09/2021 06:45 | 229 |
| 06/09/2021 07:15 | 419 |
| 06/09/2021 07:45 | 588 |
| 06/09/2021 08:15 | 665 |
| 06/09/2021 08:45 | 725 |
| 06/09/2021 09:15 | 770 |
| 06/09/2021 09:45 | 805 |
| 06/09/2021 10:15 | 830 |
| 06/09/2021 10:45 | 841 |
| 06/09/2021 11:15 | 860 |
| 06/09/2021 11:45 | 852 |
| 06/09/2021 12:15 | 832 |
| 06/09/2021 12:45 | 851 |
| 06/09/2021 13:15 | 764 |
| 06/09/2021 13:45 | 736 |
| 06/09/2021 14:15 | 714 |
| 06/09/2021 14:45 | 458 |
| 06/09/2021 15:15 | 117 |
| 06/09/2021 15:45 | 6   |
| 06/09/2021 16:15 | 504 |
| 06/09/2021 16:45 | 0   |
| 06/09/2021 17:15 | 313 |
| 06/09/2021 17:45 | 46  |
| 06/09/2021 18:15 | 8   |
| 06/09/2021 18:45 | 0   |
| 06/09/2021 19:15 | 0   |
| 06/09/2021 19:45 | 0   |

---

|                  |     |
|------------------|-----|
| 06/09/2021 20:15 | 0   |
| 06/09/2021 20:45 | 0   |
| 06/09/2021 21:15 | 0   |
| 06/09/2021 21:45 | 0   |
| 06/09/2021 22:15 | 0   |
| 06/09/2021 22:45 | 0   |
| 06/09/2021 23:15 | 0   |
| 06/09/2021 23:45 | 0   |
| 06/10/2021 00:15 | 0   |
| 06/10/2021 00:45 | 0   |
| 06/10/2021 01:15 | 0   |
| 06/10/2021 01:45 | 0   |
| 06/10/2021 02:15 | 0   |
| 06/10/2021 02:45 | 0   |
| 06/10/2021 03:15 | 0   |
| 06/10/2021 03:45 | 0   |
| 06/10/2021 04:15 | 0   |
| 06/10/2021 04:45 | 0   |
| 06/10/2021 05:15 | 0   |
| 06/10/2021 05:45 | 0   |
| 06/10/2021 06:15 | 0   |
| 06/10/2021 06:45 | 220 |
| 06/10/2021 07:15 | 384 |
| 06/10/2021 07:45 | 533 |
| 06/10/2021 08:15 | 700 |
| 06/10/2021 08:45 | 717 |
| 06/10/2021 09:15 | 763 |
| 06/10/2021 09:45 | 790 |
| 06/10/2021 10:15 | 830 |
| 06/10/2021 10:45 | 832 |
| 06/10/2021 11:15 | 849 |

---

|                  |     |
|------------------|-----|
| 06/10/2021 11:45 | 851 |
| 06/10/2021 12:15 | 862 |
| 06/10/2021 12:45 | 873 |
| 06/10/2021 13:15 | 840 |
| 06/10/2021 13:45 | 791 |
| 06/10/2021 14:15 | 634 |
| 06/10/2021 14:45 | 43  |
| 06/10/2021 15:15 | 551 |
| 06/10/2021 15:45 | 697 |
| 06/10/2021 16:15 | 677 |
| 06/10/2021 16:45 | 591 |
| 06/10/2021 17:15 | 571 |
| 06/10/2021 17:45 | 466 |
| 06/10/2021 18:15 | 182 |
| 06/10/2021 18:45 | 0   |
| 06/10/2021 19:15 | 0   |
| 06/10/2021 19:45 | 0   |
| 06/10/2021 20:15 | 0   |
| 06/10/2021 20:45 | 0   |
| 06/10/2021 21:15 | 0   |
| 06/10/2021 21:45 | 0   |
| 06/10/2021 22:15 | 0   |
| 06/10/2021 22:45 | 0   |
| 06/10/2021 23:15 | 0   |
| 06/10/2021 23:45 | 0   |
| 06/11/2021 00:15 | 0   |
| 06/11/2021 00:45 | 0   |
| 06/11/2021 01:15 | 0   |
| 06/11/2021 01:45 | 0   |
| 06/11/2021 02:15 | 0   |
| 06/11/2021 02:45 | 0   |

---



|                  |     |
|------------------|-----|
| 06/11/2021 03:15 | 0   |
| 06/11/2021 03:45 | 0   |
| 06/11/2021 04:15 | 0   |
| 06/11/2021 04:45 | 0   |
| 06/11/2021 05:15 | 0   |
| 06/11/2021 05:45 | 0   |
| 06/11/2021 06:15 | 0   |
| 06/11/2021 06:45 | 158 |
| 06/11/2021 07:15 | 377 |
| 06/11/2021 07:45 | 559 |
| 06/11/2021 08:15 | 646 |
| 06/11/2021 08:45 | 724 |
| 06/11/2021 09:15 | 706 |
| 06/11/2021 09:45 | 805 |
| 06/11/2021 10:15 | 830 |
| 06/11/2021 10:45 | 831 |
| 06/11/2021 11:15 | 859 |
| 06/11/2021 11:45 | 867 |
| 06/11/2021 12:15 | 862 |
| 06/11/2021 12:45 | 872 |
| 06/11/2021 13:15 | 860 |
| 06/11/2021 13:45 | 829 |
| 06/11/2021 14:15 | 860 |
| 06/11/2021 14:45 | 830 |
| 06/11/2021 15:15 | 805 |
| 06/11/2021 15:45 | 786 |
| 06/11/2021 16:15 | 737 |
| 06/11/2021 16:45 | 658 |
| 06/11/2021 17:15 | 551 |
| 06/11/2021 17:45 | 518 |
| 06/11/2021 18:15 | 236 |

---

|                  |     |
|------------------|-----|
| 06/11/2021 18:45 | 48  |
| 06/11/2021 19:15 | 0   |
| 06/11/2021 19:45 | 0   |
| 06/11/2021 20:15 | 0   |
| 06/11/2021 20:45 | 0   |
| 06/11/2021 21:15 | 0   |
| 06/11/2021 21:45 | 0   |
| 06/11/2021 22:15 | 0   |
| 06/11/2021 22:45 | 0   |
| 06/11/2021 23:15 | 0   |
| 06/11/2021 23:45 | 0   |
| 06/12/2021 00:15 | 0   |
| 06/12/2021 00:45 | 0   |
| 06/12/2021 01:15 | 0   |
| 06/12/2021 01:45 | 0   |
| 06/12/2021 02:15 | 0   |
| 06/12/2021 02:45 | 0   |
| 06/12/2021 03:15 | 0   |
| 06/12/2021 03:45 | 0   |
| 06/12/2021 04:15 | 0   |
| 06/12/2021 04:45 | 0   |
| 06/12/2021 05:15 | 0   |
| 06/12/2021 05:45 | 0   |
| 06/12/2021 06:15 | 0   |
| 06/12/2021 06:45 | 186 |
| 06/12/2021 07:15 | 435 |
| 06/12/2021 07:45 | 568 |
| 06/12/2021 08:15 | 644 |
| 06/12/2021 08:45 | 716 |
| 06/12/2021 09:15 | 769 |
| 06/12/2021 09:45 | 804 |

---

|                   |     |
|-------------------|-----|
| 06/12/2021 10:15  | 830 |
| 06/12/2021 10:45  | 820 |
| 06/12/2021 11:15  | 859 |
| 06/12/2021 11:45  | 867 |
| 06/12/2021 12:15  | 862 |
| 06/12/2021 12:45  | 856 |
| 06/12/2021 13:15  | 840 |
| 06/12/2021 13:45  | 854 |
| 06/12/2021 14:15  | 831 |
| 06/12/2021 14:45  | 799 |
| 06/12/2021 15:15  | 782 |
| 06/12/2021 15:45  | 775 |
| 06/12/2021 16:15  | 723 |
| 06/12/2021 16:45  | 693 |
| 06/12/2021 17:15  | 582 |
| 06/12/2021 17:45  | 478 |
| 06/12/2021 18:15  | 351 |
| 06/12/2021 18:45  | 102 |
| 06/12/2021 19:15  | 0   |
| 06/12/2021 19:45  | 0   |
| 06/12/2021 20:15  | 0   |
| 06/12/2021 20:45  | 0   |
| 06/12/2021 21:15  | 0   |
| 06/12/2021 21:45  | 0   |
| 06/12/2021 22:15  | 0   |
| 06/12/2021 22:45  | 0   |
| 06/12/2021 23:15  | 0   |
| 06/12/2021 23:45  | 0   |
| 6/13/2021 0:15:00 | 0   |
| 6/13/2021 0:45:00 | 0   |
| 6/13/2021 1:15:00 | 0   |

---

|                    |     |
|--------------------|-----|
| 6/13/2021 1:45:00  | 0   |
| 6/13/2021 2:15:00  | 0   |
| 6/13/2021 2:45:00  | 0   |
| 6/13/2021 3:15:00  | 0   |
| 6/13/2021 3:45:00  | 0   |
| 6/13/2021 4:15:00  | 0   |
| 6/13/2021 4:45:00  | 0   |
| 6/13/2021 5:15:00  | 0   |
| 6/13/2021 5:45:00  | 0   |
| 6/13/2021 6:15:00  | 0   |
| 6/13/2021 6:45:00  | 16  |
| 6/13/2021 7:15:00  | 309 |
| 6/13/2021 7:45:00  | 440 |
| 6/13/2021 8:15:00  | 232 |
| 6/13/2021 8:45:00  | 125 |
| 6/13/2021 9:15:00  | 454 |
| 6/13/2021 9:45:00  | 640 |
| 6/13/2021 10:15:00 | 795 |
| 6/13/2021 10:45:00 | 840 |
| 6/13/2021 11:15:00 | 846 |
| 6/13/2021 11:45:00 | 859 |
| 6/13/2021 12:15:00 | 871 |
| 6/13/2021 12:45:00 | 860 |
| 6/13/2021 13:15:00 | 710 |
| 6/13/2021 13:45:00 | 776 |
| 6/13/2021 14:15:00 | 792 |
| 6/13/2021 14:45:00 | 682 |
| 6/13/2021 15:15:00 | 449 |
| 6/13/2021 15:45:00 | 569 |
| 6/13/2021 16:15:00 | 643 |
| 6/13/2021 16:45:00 | 614 |

---

|                    |     |
|--------------------|-----|
| 6/13/2021 17:15:00 | 419 |
| 6/13/2021 17:45:00 | 349 |
| 6/13/2021 18:15:00 | 230 |
| 6/13/2021 18:45:00 | 39  |
| 6/13/2021 19:15:00 | 0   |
| 6/13/2021 19:45:00 | 0   |
| 6/13/2021 20:15:00 | 0   |
| 6/13/2021 20:45:00 | 0   |
| 6/13/2021 21:15:00 | 0   |
| 6/13/2021 21:45:00 | 0   |
| 6/13/2021 22:15:00 | 0   |
| 6/13/2021 22:45:00 | 0   |
| 6/13/2021 23:15:00 | 0   |
| 6/13/2021 23:45:00 | 0   |
| 6/14/2021 0:15:00  | 0   |
| 6/14/2021 0:45:00  | 0   |
| 6/14/2021 1:15:00  | 0   |
| 6/14/2021 1:45:00  | 0   |
| 6/14/2021 2:15:00  | 0   |
| 6/14/2021 2:45:00  | 0   |
| 6/14/2021 3:15:00  | 0   |
| 6/14/2021 3:45:00  | 0   |
| 6/14/2021 4:15:00  | 0   |
| 6/14/2021 4:45:00  | 0   |
| 6/14/2021 5:15:00  | 0   |
| 6/14/2021 5:45:00  | 0   |
| 6/14/2021 6:15:00  | 0   |
| 6/14/2021 6:45:00  | 193 |
| 6/14/2021 7:15:00  | 425 |
| 6/14/2021 7:45:00  | 576 |
| 6/14/2021 8:15:00  | 633 |

---

|                    |     |
|--------------------|-----|
| 6/14/2021 8:45:00  | 710 |
| 6/14/2021 9:15:00  | 686 |
| 6/14/2021 9:45:00  | 700 |
| 6/14/2021 10:15:00 | 765 |
| 6/14/2021 10:45:00 | 771 |
| 6/14/2021 11:15:00 | 723 |
| 6/14/2021 11:45:00 | 829 |
| 6/14/2021 12:15:00 | 860 |
| 6/14/2021 12:45:00 | 847 |
| 6/14/2021 13:15:00 | 840 |
| 6/14/2021 13:45:00 | 810 |
| 6/14/2021 14:15:00 | 770 |
| 6/14/2021 14:45:00 | 726 |
| 6/14/2021 15:15:00 | 688 |
| 6/14/2021 15:45:00 | 498 |
| 6/14/2021 16:15:00 | 631 |
| 6/14/2021 16:45:00 | 628 |
| 6/14/2021 17:15:00 | 553 |
| 6/14/2021 17:45:00 | 426 |
| 6/14/2021 18:15:00 | 281 |
| 6/14/2021 18:45:00 | 53  |
| 6/14/2021 19:15:00 | 0   |
| 6/14/2021 19:45:00 | 0   |
| 6/14/2021 20:15:00 | 0   |
| 6/14/2021 20:45:00 | 0   |
| 6/14/2021 21:15:00 | 0   |
| 6/14/2021 21:45:00 | 0   |
| 6/14/2021 22:15:00 | 0   |
| 6/14/2021 22:45:00 | 0   |
| 6/14/2021 23:15:00 | 0   |
| 6/14/2021 23:45:00 | 0   |

---

|                    |     |
|--------------------|-----|
| 6/15/2021 0:15:00  | 0   |
| 6/15/2021 0:45:00  | 0   |
| 6/15/2021 1:15:00  | 0   |
| 6/15/2021 1:45:00  | 0   |
| 6/15/2021 2:15:00  | 0   |
| 6/15/2021 2:45:00  | 0   |
| 6/15/2021 3:15:00  | 0   |
| 6/15/2021 3:45:00  | 0   |
| 6/15/2021 4:15:00  | 0   |
| 6/15/2021 4:45:00  | 0   |
| 6/15/2021 5:15:00  | 0   |
| 6/15/2021 5:45:00  | 0   |
| 6/15/2021 6:15:00  | 18  |
| 6/15/2021 6:45:00  | 201 |
| 6/15/2021 7:15:00  | 442 |
| 6/15/2021 7:45:00  | 575 |
| 6/15/2021 8:15:00  | 662 |
| 6/15/2021 8:45:00  | 708 |
| 6/15/2021 9:15:00  | 768 |
| 6/15/2021 9:45:00  | 803 |
| 6/15/2021 10:15:00 | 823 |
| 6/15/2021 10:45:00 | 846 |
| 6/15/2021 11:15:00 | 846 |
| 6/15/2021 11:45:00 | 867 |
| 6/15/2021 12:15:00 | 871 |
| 6/15/2021 12:45:00 | 872 |
| 6/15/2021 13:15:00 | 830 |
| 6/15/2021 13:45:00 | 788 |
| 6/15/2021 14:15:00 | 782 |
| 6/15/2021 14:45:00 | 772 |
| 6/15/2021 15:15:00 | 784 |

---

|                    |     |
|--------------------|-----|
| 6/15/2021 15:45:00 | 770 |
| 6/15/2021 16:15:00 | 725 |
| 6/15/2021 16:45:00 | 678 |
| 6/15/2021 17:15:00 | 421 |
| 6/15/2021 17:45:00 | 22  |
| 6/15/2021 18:15:00 | 4   |
| 6/15/2021 18:45:00 | 31  |
| 6/15/2021 19:15:00 | 0   |
| 6/15/2021 19:45:00 | 0   |
| 6/15/2021 20:15:00 | 0   |
| 6/15/2021 20:45:00 | 0   |
| 6/15/2021 21:15:00 | 0   |
| 6/15/2021 21:45:00 | 0   |
| 6/15/2021 22:15:00 | 0   |
| 6/15/2021 22:45:00 | 0   |
| 6/15/2021 23:15:00 | 0   |
| 6/15/2021 23:45:00 | 0   |
| 6/16/2021 0:15:00  | 0   |
| 6/16/2021 0:45:00  | 0   |
| 6/16/2021 1:15:00  | 0   |
| 6/16/2021 1:45:00  | 0   |
| 6/16/2021 2:15:00  | 0   |
| 6/16/2021 2:45:00  | 0   |
| 6/16/2021 3:15:00  | 0   |
| 6/16/2021 3:45:00  | 0   |
| 6/16/2021 4:15:00  | 0   |
| 6/16/2021 4:45:00  | 0   |
| 6/16/2021 5:15:00  | 0   |
| 6/16/2021 5:45:00  | 0   |
| 6/16/2021 6:15:00  | 0   |
| 6/16/2021 6:45:00  | 233 |

---



|                    |     |
|--------------------|-----|
| 6/16/2021 7:15:00  | 402 |
| 6/16/2021 7:45:00  | 565 |
| 6/16/2021 8:15:00  | 662 |
| 6/16/2021 8:45:00  | 708 |
| 6/16/2021 9:15:00  | 760 |
| 6/16/2021 9:45:00  | 805 |
| 6/16/2021 10:15:00 | 828 |
| 6/16/2021 10:45:00 | 840 |
| 6/16/2021 11:15:00 | 860 |
| 6/16/2021 11:45:00 | 799 |
| 6/16/2021 12:15:00 | 671 |
| 6/16/2021 12:45:00 | 744 |
| 6/16/2021 13:15:00 | 680 |
| 6/16/2021 13:45:00 | 664 |
| 6/16/2021 14:15:00 | 79  |
| 6/16/2021 14:45:00 | 590 |
| 6/16/2021 15:15:00 | 690 |
| 6/16/2021 15:45:00 | 546 |
| 6/16/2021 16:15:00 | 0   |
| 6/16/2021 16:45:00 | 0   |
| 6/16/2021 17:15:00 | 0   |
| 6/16/2021 17:45:00 | 0   |
| 6/16/2021 18:15:00 | 0   |
| 6/16/2021 18:45:00 | 25  |
| 6/16/2021 19:15:00 | 0   |
| 6/16/2021 19:45:00 | 0   |
| 6/16/2021 20:15:00 | 0   |
| 6/16/2021 20:45:00 | 0   |
| 6/16/2021 21:15:00 | 0   |
| 6/16/2021 21:45:00 | 0   |
| 6/16/2021 22:15:00 | 0   |

---

|                    |     |
|--------------------|-----|
| 6/16/2021 22:45:00 | 0   |
| 6/16/2021 23:15:00 | 0   |
| 6/16/2021 23:45:00 | 0   |
| 6/17/2021 0:15:00  | 0   |
| 6/17/2021 0:45:00  | 0   |
| 6/17/2021 1:15:00  | 0   |
| 6/17/2021 1:45:00  | 0   |
| 6/17/2021 2:15:00  | 0   |
| 6/17/2021 2:45:00  | 0   |
| 6/17/2021 3:15:00  | 0   |
| 6/17/2021 3:45:00  | 0   |
| 6/17/2021 4:15:00  | 0   |
| 6/17/2021 4:45:00  | 0   |
| 6/17/2021 5:15:00  | 0   |
| 6/17/2021 5:45:00  | 0   |
| 6/17/2021 6:15:00  | 1   |
| 6/17/2021 6:45:00  | 244 |
| 6/17/2021 7:15:00  | 431 |
| 6/17/2021 7:45:00  | 573 |
| 6/17/2021 8:15:00  | 661 |
| 6/17/2021 8:45:00  | 722 |
| 6/17/2021 9:15:00  | 767 |
| 6/17/2021 9:45:00  | 802 |
| 6/17/2021 10:15:00 | 828 |
| 6/17/2021 10:45:00 | 777 |
| 6/17/2021 11:15:00 | 283 |
| 6/17/2021 11:45:00 | 599 |
| 6/17/2021 12:15:00 | 719 |
| 6/17/2021 12:45:00 | 646 |
| 6/17/2021 13:15:00 | 626 |
| 6/17/2021 13:45:00 | 365 |

---

|                    |     |
|--------------------|-----|
| 6/17/2021 14:15:00 | 62  |
| 6/17/2021 14:45:00 | 297 |
| 6/17/2021 15:15:00 | 665 |
| 6/17/2021 15:45:00 | 547 |
| 6/17/2021 16:15:00 | 577 |
| 6/17/2021 16:45:00 | 105 |
| 6/17/2021 17:15:00 | 0   |
| 6/17/2021 17:45:00 | 0   |
| 6/17/2021 18:15:00 | 262 |
| 6/17/2021 18:45:00 | 118 |
| 6/17/2021 19:15:00 | 0   |
| 6/17/2021 19:45:00 | 0   |
| 6/17/2021 20:15:00 | 0   |
| 6/17/2021 20:45:00 | 0   |
| 6/17/2021 21:15:00 | 0   |
| 6/17/2021 21:45:00 | 0   |
| 6/17/2021 22:15:00 | 0   |
| 6/17/2021 22:45:00 | 0   |
| 6/17/2021 23:15:00 | 0   |
| 6/17/2021 23:45:00 | 0   |
| 6/18/2021 0:15:00  | 0   |
| 6/18/2021 0:45:00  | 0   |
| 6/18/2021 1:15:00  | 0   |
| 6/18/2021 1:45:00  | 0   |
| 6/18/2021 2:15:00  | 0   |
| 6/18/2021 2:45:00  | 0   |
| 6/18/2021 3:15:00  | 0   |
| 6/18/2021 3:45:00  | 0   |
| 6/18/2021 4:15:00  | 0   |
| 6/18/2021 4:45:00  | 0   |
| 6/18/2021 5:15:00  | 0   |

---

|                    |     |
|--------------------|-----|
| 6/18/2021 5:45:00  | 0   |
| 6/18/2021 6:15:00  | 0   |
| 6/18/2021 6:45:00  | 186 |
| 6/18/2021 7:15:00  | 454 |
| 6/18/2021 7:45:00  | 569 |
| 6/18/2021 8:15:00  | 658 |
| 6/18/2021 8:45:00  | 703 |
| 6/18/2021 9:15:00  | 720 |
| 6/18/2021 9:45:00  | 783 |
| 6/18/2021 10:15:00 | 648 |
| 6/18/2021 10:45:00 | 833 |
| 6/18/2021 11:15:00 | 860 |
| 6/18/2021 11:45:00 | 859 |
| 6/18/2021 12:15:00 | 788 |
| 6/18/2021 12:45:00 | 501 |
| 6/18/2021 13:15:00 | 45  |
| 6/18/2021 13:45:00 | 24  |
| 6/18/2021 14:15:00 | 138 |
| 6/18/2021 14:45:00 | 461 |
| 6/18/2021 15:15:00 | 129 |
| 6/18/2021 15:45:00 | 578 |
| 6/18/2021 16:15:00 | 345 |
| 6/18/2021 16:45:00 | 281 |
| 6/18/2021 17:15:00 | 430 |
| 6/18/2021 17:45:00 | 219 |
| 6/18/2021 18:15:00 | 0   |
| 6/18/2021 18:45:00 | 0   |
| 6/18/2021 19:15:00 | 0   |
| 6/18/2021 19:45:00 | 0   |
| 6/18/2021 20:15:00 | 0   |
| 6/18/2021 20:45:00 | 0   |

---

|                    |     |
|--------------------|-----|
| 6/18/2021 21:15:00 | 0   |
| 6/18/2021 21:45:00 | 0   |
| 6/18/2021 22:15:00 | 0   |
| 6/18/2021 22:45:00 | 0   |
| 6/18/2021 23:15:00 | 0   |
| 6/18/2021 23:45:00 | 0   |
| 6/19/2021 0:15:00  | 0   |
| 6/19/2021 0:45:00  | 0   |
| 6/19/2021 1:15:00  | 0   |
| 6/19/2021 1:45:00  | 0   |
| 6/19/2021 2:15:00  | 0   |
| 6/19/2021 2:45:00  | 0   |
| 6/19/2021 3:15:00  | 0   |
| 6/19/2021 3:45:00  | 0   |
| 6/19/2021 4:15:00  | 0   |
| 6/19/2021 4:45:00  | 0   |
| 6/19/2021 5:15:00  | 0   |
| 6/19/2021 5:45:00  | 0   |
| 6/19/2021 6:15:00  | 0   |
| 6/19/2021 6:45:00  | 242 |
| 6/19/2021 7:15:00  | 434 |
| 6/19/2021 7:45:00  | 577 |
| 6/19/2021 8:15:00  | 660 |
| 6/19/2021 8:45:00  | 716 |
| 6/19/2021 9:15:00  | 766 |
| 6/19/2021 9:45:00  | 804 |
| 6/19/2021 10:15:00 | 828 |
| 6/19/2021 10:45:00 | 845 |
| 6/19/2021 11:15:00 | 860 |
| 6/19/2021 11:45:00 | 866 |
| 6/19/2021 12:15:00 | 870 |

---

|                    |     |
|--------------------|-----|
| 6/19/2021 12:45:00 | 871 |
| 6/19/2021 13:15:00 | 838 |
| 6/19/2021 13:45:00 | 737 |
| 6/19/2021 14:15:00 | 712 |
| 6/19/2021 14:45:00 | 22  |
| 6/19/2021 15:15:00 | 449 |
| 6/19/2021 15:45:00 | 133 |
| 6/19/2021 16:15:00 | 661 |
| 6/19/2021 16:45:00 | 685 |
| 6/19/2021 17:15:00 | 562 |
| 6/19/2021 17:45:00 | 392 |
| 6/19/2021 18:15:00 | 39  |
| 6/19/2021 18:45:00 | 106 |
| 6/19/2021 19:15:00 | 0   |
| 6/19/2021 19:45:00 | 0   |
| 6/19/2021 20:15:00 | 0   |
| 6/19/2021 20:45:00 | 0   |
| 6/19/2021 21:15:00 | 0   |
| 6/19/2021 21:45:00 | 0   |
| 6/19/2021 22:15:00 | 0   |
| 6/19/2021 22:45:00 | 0   |
| 6/19/2021 23:15:00 | 0   |
| 6/19/2021 23:45:00 | 0   |
| 6/20/2021 0:15:00  | 0   |
| 6/20/2021 0:45:00  | 0   |
| 6/20/2021 1:15:00  | 0   |
| 6/20/2021 1:45:00  | 0   |
| 6/20/2021 2:15:00  | 0   |
| 6/20/2021 2:45:00  | 0   |
| 6/20/2021 3:15:00  | 0   |
| 6/20/2021 3:45:00  | 0   |

---

|                    |     |
|--------------------|-----|
| 6/20/2021 4:15:00  | 0   |
| 6/20/2021 4:45:00  | 0   |
| 6/20/2021 5:15:00  | 0   |
| 6/20/2021 5:45:00  | 0   |
| 6/20/2021 6:15:00  | 0   |
| 6/20/2021 6:45:00  | 65  |
| 6/20/2021 7:15:00  | 299 |
| 6/20/2021 7:45:00  | 175 |
| 6/20/2021 8:15:00  | 456 |
| 6/20/2021 8:45:00  | 242 |
| 6/20/2021 9:15:00  | 660 |
| 6/20/2021 9:45:00  | 750 |
| 6/20/2021 10:15:00 | 455 |
| 6/20/2021 10:45:00 | 633 |
| 6/20/2021 11:15:00 | 358 |
| 6/20/2021 11:45:00 | 571 |
| 6/20/2021 12:15:00 | 107 |
| 6/20/2021 12:45:00 | 449 |
| 6/20/2021 13:15:00 | 312 |
| 6/20/2021 13:45:00 | 14  |
| 6/20/2021 14:15:00 | 6   |
| 6/20/2021 14:45:00 | 275 |
| 6/20/2021 15:15:00 | 298 |
| 6/20/2021 15:45:00 | 705 |
| 6/20/2021 16:15:00 | 587 |
| 6/20/2021 16:45:00 | 70  |
| 6/20/2021 17:15:00 | 0   |
| 6/20/2021 17:45:00 | 0   |
| 6/20/2021 18:15:00 | 0   |
| 6/20/2021 18:45:00 | 0   |
| 6/20/2021 19:15:00 | 0   |

---

|                    |   |
|--------------------|---|
| 6/20/2021 19:45:00 | 0 |
| 6/20/2021 20:15:00 | 0 |
| 6/20/2021 20:45:00 | 0 |
| 6/20/2021 21:15:00 | 0 |
| 6/20/2021 21:45:00 | 0 |
| 6/20/2021 22:15:00 | 0 |
| 6/20/2021 22:45:00 | 0 |
| 6/20/2021 23:15:00 | 0 |
| 6/20/2021 23:45:00 | 0 |
| 6/21/2021 0:15:00  | 0 |
| 6/21/2021 0:45:00  | 0 |
| 6/21/2021 1:15:00  | 0 |
| 6/21/2021 1:45:00  | 0 |
| 6/21/2021 2:15:00  | 0 |

---
